# Supplementary material for: Differentially Expressed Long Noncoding RNAs Involved in FUBP1 Promoting Hepatocellular Carcinoma Cells Proliferation
Source: Hindawi journal article supplement (doi:10.1155/2021/6664519), 2021-01-01
Supplement: f2 [file 6664519.f2.pdf]

| Probe Set ID      | FC ( 97L-Log FC ( FC (abs) | Regulatio | 97L-FUBF | 97L-mo | GeneSymbol | Description | IncipediaID          | NonCodeID        | Chr              | start     | stop      | strand    |           |   |
|-------------------|----------------------------|-----------|----------|--------|------------|-------------|----------------------|------------------|------------------|-----------|-----------|-----------|-----------|---|
| TC0100000152.oe.1 | -2.41                      | -1.27     | 2.41     | down   | 3.13       | 4.40        | OTTHUMG0 N/A//unchar | Inc-SLC45A1      | NONHSAT0(        | chr1      | 8208672   | 8215210   | +         |   |
| TC0100000238.oe.1 | 2.11                       | 1.08      | 2.11     | up     | 5.29       | 4.21        | Inc-AADACL           | NONCODE c        | Inc-AADACL       | NONHSAT0( | chr1      | 12497226  | 12506907  | + |
| TC0100000356.oe.1 | 2.37                       | 1.24      | 2.37     | up     | 4.33       | 3.08        | Inc-NBPF3-1          | gene_id XLO      | Inc-NBPF3-1      | NONHSAT0( | chr1      | 21418289  | 21420016  | + |
| TC0100000378.oe.1 | 2.07                       | 1.05      | 2.07     | up     | 5.14       | 4.09        | Inc-EPHB2-2          | LNCipedia lc     | Inc-EPHB2-2      | NONHSAT0( | chr1      | 23080873  | 23083682  | + |
| TC0100000390.oe.1 | 2.18                       | 1.13      | 2.18     | up     | 7.97       | 6.84        | Inc-PITHD1-1         | LNCipedia lc     | Inc-PITHD1-1     | NONHSAT0( | chr1      | 23744034  | 23750944  | + |
| TC0100000392.oe.1 | 2.39                       | 1.26      | 2.39     | up     | 8.86       | 7.60        | Inc-PITHD1-1         | NONCODE c        | Inc-PITHD1-1     | NONHSAT0( | chr1      | 23794092  | 23795081  | + |
| TC0100000412.oe.1 | 3.52                       | 1.82      | 3.52     | up     | 8.40       | 6.58        | Inc-C1orf13(         | NONCODE c        | Inc-C1orf13(     | NONHSAT0( | chr1      | 24666555  | 24669264  | + |
| TC0100000454.oe.1 | 2.05                       | 1.03      | 2.05     | up     | 5.27       | 4.24        | Inc-HMGN2            | NONCODE c        | Inc-HMGN2        | NONHSAT0( | chr1      | 26551446  | 26554135  | + |
| TC0100000480.oe.1 | -2.16                      | -1.11     | 2.16     | down   | 3.41       | 4.51        | Inc-GPR3-1/          | NONCODE c        | Inc-GPR3-1:      | NONHSAT0( | chr1      | 27457198  | 27459582  | + |
| TC0100000635.oe.1 | -2.32                      | -1.21     | 2.32     | down   | 3.37       | 4.59        | Inc-DNALI1-          | NONCODE c        | Inc-DNALI1-      | NONHSAT0( | chr1      | 37604422  | 37606253  | + |
| TC0100000723.oe.1 | 2.36                       | 1.24      | 2.36     | up     | 11.36      | 10.12       | Inc-KCNQ4-           | NONCODE c        | Inc-KCNQ4-       | NONHSAT0( | chr1      | 41000813  | 41003176  | + |
| TC0100000738.oe.1 | 2.70                       | 1.43      | 2.70     | up     | 4.74       | 3.30        | Inc-PPCS-2           | LNCipedia lc     | Inc-PPCS-2: ---  | chr1      | 42451273  | 42454245  | +         |   |
| TC0100000757.oe.1 | 2.06                       | 1.04      | 2.06     | up     | 11.53      | 10.49       | Inc-MPL-1            | NONCODE c        | Inc-MPL-1:1      | NONHSAT0( | chr1      | 43361058  | 43363066  | + |
| TC0100000781.oe.1 | 2.04                       | 1.03      | 2.04     | up     | 5.95       | 4.93        | Inc-DMAP1-           | NONCODE c        | Inc-DMAP1-       | NONHSAT0( | chr1      | 44412698  | 44419872  | + |
| TC0100000893.oe.1 | -2.04                      | -1.03     | 2.04     | down   | 11.55      | 12.58       | Inc-BTF3L4-          | LNCipedia lc     | Inc-BTF3L4-      | NONHSAT0( | chr1      | 51745597  | 51759546  | + |
| TC0100001095.oe.1 | 2.30                       | 1.20      | 2.30     | up     | 7.22       | 6.02        | Inc-HHLA3-           | NONCODE c        | Inc-HHLA3-       | NONHSAT0( | chr1      | 70434851  | 70439232  | + |
| TC0100001119.oe.1 | -2.37                      | -1.25     | 2.37     | down   | 4.28       | 5.52        | Inc-FPGT-T/          | LNCipedia lc     | Inc-FPGT-T/      | NONHSAT0( | chr1      | 74198253  | 74249518  | + |
| TC0100001157.oe.1 | -2.32                      | -1.21     | 2.32     | down   | 6.45       | 7.67        | Inc-IFI44-8          | NONCODE c        | Inc-IFI44-8:1    | NONHSAT0( | chr1      | 79696440  | 79700695  | + |
| TC0100001374.oe.1 | 2.81                       | 1.49      | 2.81     | up     | 4.76       | 3.27        | Inc-AMY2B-           | NONCODE c        | Inc-AMY2B-       | NONHSAT0( | chr1      | 103577387 | 103579534 | + |
| TC0100001406.oe.1 | -2.24                      | -1.16     | 2.24     | down   | 7.32       | 8.48        | Inc-STXBP3-          | NONCODE c        | Inc-STXBP3-      | NONHSAT0( | chr1      | 108746674 | 108757005 | + |
| TC0100001509.oe.1 | 2.09                       | 1.07      | 2.09     | up     | 4.16       | 3.10        | Inc-OLFML3           | LNCipedia lc     | Inc-OLFML3 ---   | chr1      | 114007950 | 114063801 | +         |   |
| TC0100001609.oe.1 | 3.09                       | 1.63      | 3.09     | up     | 12.66      | 11.03       | RNVU1-14             | RNA, variant --- | ---              | chr1      | 145281116 | 145281462 | +         |   |
| TC0100001658.oe.1 | 2.15                       | 1.11      | 2.15     | up     | 5.37       | 4.26        | OTTHUMG0             | NONCODE c        | Inc-PDE4DIF      | NONHSAT0( | chr1      | 149048576 | 149051394 | + |
| TC0100001705.oe.1 | -2.17                      | -1.12     | 2.17     | down   | 6.90       | 8.02        | Inc-SETDB1-          | LNCipedia lc     | Inc-SETDB1-      | NONHSAT0( | chr1      | 150982249 | 150984371 | + |
| TC0100001759.oe.1 | -2.01                      | -1.00     | 2.01     | down   | 4.60       | 5.61        | Inc-LELP1-2          | LNCipedia lc     | Inc-LELP1-2      | NONHSAT0( | chr1      | 153140120 | 153150040 | + |
| TC0100001801.oe.1 | 2.08                       | 1.06      | 2.08     | up     | 9.44       | 8.38        | Inc-FLAD1-2          | LNCipedia lc     | Inc-FLAD1-2      | NONHSAT0( | chr1      | 154990213 | 154993111 | + |
| TC0100001942.oe.1 | 2.22                       | 1.15      | 2.22     | up     | 6.09       | 4.94        | Inc-DDR2-2           | LNCipedia lc     | Inc-DDR2-2       | NONHSAT0( | chr1      | 162790721 | 162812526 | + |
| TC0100001984.oe.1 | -2.38                      | -1.25     | 2.38     | down   | 2.81       | 4.06        | Inc-MAEL-3           | LNCipedia lc     | Inc-MAEL-3       | NONHSAT0( | chr1      | 166981536 | 166982083 | + |
| TC0100002062.oe.1 | -2.05                      | -1.04     | 2.05     | down   | 6.45       | 7.48        | Inc-PRDX6-1          | LNCipedia lc     | Inc-PRDX6-1 ---  | chr1      | 173261644 | 173261877 | +         |   |
| TC0100002080.oe.1 | 2.78                       | 1.48      | 2.78     | up     | 7.26       | 5.78        | Inc-GPR52-2          | LNCipedia lc     | Inc-GPR52-2      | NONHSAT0( | chr1      | 174220712 | 174243167 | + |
| TC0100002107.oe.1 | 2.61                       | 1.38      | 2.61     | up     | 4.62       | 3.24        | Inc-C1orf22(         | NONCODE c        | Inc-C1orf22(     | NONHSAT0( | chr1      | 178569477 | 178570415 | + |
| TC0100002119.oe.1 | 2.06                       | 1.04      | 2.06     | up     | 9.86       | 8.81        | Inc-SOAT1--          | NONCODE c        | Inc-SOAT1--      | NONHSAT0( | chr1      | 179201705 | 179201926 | + |
| TC0100002133.oe.1 | 2.27                       | 1.18      | 2.27     | up     | 4.03       | 2.85        | Inc-CEP350-          | LNCipedia lc     | Inc-CEP350-      | NONHSAT0( | chr1      | 180131729 | 180134851 | + |
| TC0100002141.oe.1 | -2.43                      | -1.28     | 2.43     | down   | 4.46       | 5.74        | Inc-KIAA161          | NONCODE c        | Inc-KIAA161      | NONHSAT0( | chr1      | 180887572 | 180888448 | + |
| TC0100002178.oe.1 | 2.43                       | 1.28      | 2.43     | up     | 5.52       | 4.24        | Inc-LAMC2-           | LNCipedia lc     | Inc-LAMC2-       | NONHSAT0( | chr1      | 183138379 | 183141304 | + |
| TC0100002276.oe.1 | -2.48                      | -1.31     | 2.48     | down   | 8.94       | 10.25       | Inc-CFH-2            | LNCipedia lc     | Inc-CFH-2:1      | NONHSAT0( | chr1      | 196676988 | 196747504 | + |
| TC0100002285.oe.1 | -2.68                      | -1.42     | 2.68     | down   | 7.82       | 9.25        | Inc-CFHR5-1          | LNCipedia lc     | Inc-CFHR5-1      | NONHSAT0( | chr1      | 197363817 | 197364078 | + |
| TC0100002288.oe.1 | 2.42                       | 1.28      | 2.42     | up     | 8.19       | 6.92        | Inc-LHX9-2           | LNCipedia lc     | Inc-LHX9-2:      | NONHSAT0( | chr1      | 197905517 | 197907364 | + |
| TC0100002396.oe.1 | 2.24                       | 1.16      | 2.24     | up     | 5.54       | 4.38        | Inc-MDM4-1           | LNCipedia lc     | Inc-MDM4-1       | NONHSAT0( | chr1      | 204403390 | 204404742 | + |
| TC0100002431.oe.1 | -2.31                      | -1.21     | 2.31     | down   | 3.11       | 4.32        | Inc-C1orf18(         | LNCipedia lc     | Inc-C1orf18( --- | chr1      | 206215584 | 206219787 | +         |   |
| TC0100002434.oe.1 | 2.76                       | 1.47      | 2.76     | up     | 5.16       | 3.70        | Inc-IBKE-2           | NONCODE c        | Inc-IBKE-2:      | NONHSAT0( | chr1      | 206453345 | 206454509 | + |
| TC0100002486.oe.1 | 2.91                       | 1.54      | 2.91     | up     | 9.19       | 7.65        | Inc-HSD11B           | LNCipedia lc     | Inc-HSD11B       | NONHSAT0( | chr1      | 209675686 | 209675993 | + |
| TC0100002578.oe.1 | -2.30                      | -1.20     | 2.30     | down   | 4.29       | 5.49        | OTTHUMG0             | LNCipedia lc     | Inc-LYPLAL1 ---  | chr1      | 219557192 | 219557701 | +         |   |
| TC0100002593.oe.1 | -2.37                      | -1.24     | 2.37     | down   | 5.59       | 6.83        | Inc-MARC1-           | NONCODE c        | Inc-MARC1-       | NONHSAT0( | chr1      | 220756278 | 220761764 | + |
| TC0100003108.oe.1 | -2.11                      | -1.08     | 2.11     | down   | 3.69       | 4.77        | Inc-DFFA-4           | NONCODE c        | Inc-DFFA-4:      | NONHSAT0( | chr1      | 10637121  | 10638763  | - |
| TC0100003170.oe.1 | -2.37                      | -1.25     | 2.37     | down   | 3.15       | 4.39        | Inc-ZBTB17-          | LNCipedia lc     | Inc-ZBTB17-      | NONHSAT0( | chr1      | 15917698  | 15917908  | - |
| TC0100003209.oe.1 | 2.20                       | 1.14      | 2.20     | up     | 10.89      | 9.75        | Inc-KIAA009          | NONCODE c        | Inc-KIAA009      | NONHSAT0( | chr1      | 19144852  | 19146128  | - |
| TC0100003280.oe.1 | -2.09                      | -1.06     | 2.09     | down   | 3.89       | 4.95        | Inc-ASAP3-2          | LNCipedia lc     | Inc-ASAP3-2:     | NONHSAT0( | chr1      | 23408560  | 23419236  | - |

|                   |       |       |      |      |       |       |                         |                            |      |           |           |   |
|-------------------|-------|-------|------|------|-------|-------|-------------------------|----------------------------|------|-----------|-----------|---|
| TC0100003462.oe.1 | -2.07 | -1.05 | 2.07 | down | 15.04 | 16.09 | Inc-ZMYM6- LNCipedia    | lc Inc-ZMYM6- ---          | chr1 | 34957213  | 34957413  | - |
| TC0100003515.oe.1 | 2.23  | 1.16  | 2.23 | up   | 5.64  | 4.48  | Inc-MTF1-1 LNCipedia    | lc Inc-MTF1-1: NONHSAT0(   | chr1 | 37809577  | 37813320  | - |
| TC0100003645.oe.1 | 2.04  | 1.03  | 2.04 | up   | 7.45  | 6.42  | Inc-PIK3R3- LNCipedia   | lc Inc-PIK3R3-: NONHSAT0(  | chr1 | 46193383  | 46194651  | - |
| TC0100003802.oe.1 | 2.04  | 1.03  | 2.04 | up   | 4.87  | 3.84  | Inc-OMA1- LNCipedia     | lc Inc-OMA1-: NONHSAT0(    | chr1 | 58228682  | 58229003  | - |
| TC0100003889.oe.1 | -2.03 | -1.02 | 2.03 | down | 6.98  | 8.00  | Inc-RPE65-1 NONCODE     | cl Inc-RPE65-1 NONHSAT0(   | chr1 | 68475574  | 68482238  | - |
| TC0100003946.oe.1 | 3.19  | 1.67  | 3.19 | up   | 5.48  | 3.80  | Inc-FUBP1- LNCipedia    | lc Inc-FUBP1-: ---         | chr1 | 78004346  | 78004554  | - |
| TC0100004051.oe.1 | -2.30 | -1.20 | 2.30 | down | 3.20  | 4.41  | Inc-BARHL2 LNCipedia    | lc Inc-BARHL2 ---          | chr1 | 90283497  | 90306059  | - |
| TC0100004134.oe.1 | 2.28  | 1.19  | 2.28 | up   | 11.66 | 10.47 | Inc-SASS6- LNCipedia    | lc Inc-SASS6-: NONHSAT0(   | chr1 | 99710825  | 99715659  | - |
| TC0100004273.oe.1 | 3.36  | 1.75  | 3.36 | up   | 8.35  | 6.60  | Inc-BCL2L15 NONCODE     | cl Inc-BCL2L15 NONHSAT0(   | chr1 | 113878168 | 113887459 | - |
| TC0100004282.oe.1 | 2.06  | 1.04  | 2.06 | up   | 3.73  | 2.69  | Inc-BCAS2- LNCipedia    | lc Inc-BCAS2-: ---         | chr1 | 114558476 | 114558681 | - |
| TC0100004330.oe.1 | 2.08  | 1.06  | 2.08 | up   | 8.92  | 7.86  | Inc-WARS2- LNCipedia    | lc Inc-WARS2- NONHSAT0(    | chr1 | 119219314 | 119220096 | - |
| TC0100004353.oe.1 | -2.68 | -1.42 | 2.68 | down | 14.28 | 15.70 | Inc-FCGR1B gene_id XLO  | Inc-FCGR1B NONHSAT0(       | chr1 | 121742259 | 121743636 | - |
| TC0100004378.oe.1 | -2.57 | -1.36 | 2.57 | down | 4.48  | 5.84  | Inc-PDZK1- LNCipedia    | lc Inc-PDZK1-: NONHSAT0(   | chr1 | 145670985 | 145672848 | - |
| TC0100004380.oe.1 | -2.53 | -1.34 | 2.53 | down | 4.12  | 5.46  | Inc-PIAS3-1 LNCipedia   | lc Inc-PIAS3-1 ---         | chr1 | 145796993 | 145798540 | - |
| TC0100004389.oe.1 | -2.11 | -1.08 | 2.11 | down | 7.16  | 8.24  | Inc-NBPF10 LNCipedia    | lc Inc-NBPF10- ---         | chr1 | 146224791 | 146225057 | - |
| TC0100004522.oe.1 | -2.10 | -1.07 | 2.10 | down | 3.57  | 4.64  | Inc-C1orf43 LNCipedia   | lc Inc-C1orf43- ---        | chr1 | 154239837 | 154240157 | - |
| TC0100004569.oe.1 | -2.17 | -1.12 | 2.17 | down | 4.10  | 5.21  | Inc-YY1AP1 LNCipedia    | lc Inc-YY1AP1- ---         | chr1 | 155498854 | 155503759 | - |
| TC0100004604.oe.1 | 2.20  | 1.14  | 2.20 | up   | 8.31  | 7.17  | NONHSAG0 LNCipedia      | lc Inc-NES- 1:1 NONHSAT0(  | chr1 | 156646507 | 156661424 | - |
| TC0100004633.oe.1 | -3.16 | -1.66 | 3.16 | down | 2.46  | 4.12  | Inc-OR10X1 LNCipedia    | lc Inc-OR10X1 ---          | chr1 | 158594664 | 158594871 | - |
| TC0100004725.oe.1 | 2.33  | 1.22  | 2.33 | up   | 3.81  | 2.59  | RP11-276E1 LNCipedia    | lc Inc-FAM78B NONHSAT0(    | chr1 | 166475772 | 166490039 | - |
| TC0100004758.oe.1 | 8.10  | 3.02  | 8.10 | up   | 7.57  | 4.55  | Inc-SELE-1 LNCipedia    | lc Inc-SELE- 1:2 NONHSAT0( | chr1 | 169691681 | 169708456 | - |
| TC0100004800.oe.1 | -2.35 | -1.23 | 2.35 | down | 5.14  | 6.37  | Inc-RC3H1- LNCipedia    | lc Inc-RC3H1-: NONHSAT0(   | chr1 | 173931214 | 173936175 | - |
| TC0100004818.oe.1 | -2.01 | -1.01 | 2.01 | down | 3.17  | 4.18  | OTTHUMG0 LNCipedia      | lc Inc-RFWD2- NONHSAT0(    | chr1 | 175538775 | 175556818 | - |
| TC0100004823.oe.1 | 2.07  | 1.05  | 2.07 | up   | 11.00 | 9.95  | Inc-TNR-6 NONCODE       | cl Inc-TNR- 6:1 NONHSAT0(  | chr1 | 175944831 | 176081256 | - |
| TC0100004927.oe.1 | 5.49  | 2.46  | 5.49 | up   | 7.06  | 4.60  | Inc-PDC-2 NONCODE       | cl Inc-PDC- 2:1 NONHSAT0(  | chr1 | 186678270 | 186680423 | - |
| TC0100004954.oe.1 | -2.10 | -1.07 | 2.10 | down | 3.24  | 4.31  | Inc-UCHL5- LNCipedia    | lc Inc-UCHL5- ---          | chr1 | 191950869 | 191955052 | - |
| TC0100004961.oe.1 | -2.13 | -1.09 | 2.13 | down | 4.45  | 5.54  | Inc-GLRX2-1 LNCipedia   | lc Inc-GLRX2-1 ---         | chr1 | 193090866 | 193091556 | - |
| TC0100005027.oe.1 | 2.34  | 1.22  | 2.34 | up   | 9.56  | 8.34  | Inc-SYT2-2 LNCipedia    | lc Inc-SYT2- 2:1 NONHSAT0( | chr1 | 202745877 | 202746595 | - |
| TC0100005072.oe.1 | -2.94 | -1.56 | 2.94 | down | 6.20  | 7.76  | Inc-SLC45A LNCipedia    | lc Inc-SLC45A: NONHSAT0(   | chr1 | 205607945 | 205609670 | - |
| TC0100005073.oe.1 | -2.06 | -1.04 | 2.06 | down | 7.85  | 8.89  | Inc-SLC45A LNCipedia    | lc Inc-SLC45A: NONHSAT0(   | chr1 | 205609716 | 205612016 | - |
| TC0100005081.oe.1 | 2.26  | 1.18  | 2.26 | up   | 6.15  | 4.97  | Inc-AVPR1B LNCipedia    | lc Inc-AVPR1B NONHSAT0(    | chr1 | 206012331 | 206014130 | - |
| TC0100005133.oe.1 | -2.35 | -1.23 | 2.35 | down | 3.02  | 4.25  | Inc-C1orf13 LNCipedia   | lc Inc-C1orf13- ---        | chr1 | 210040660 | 210040860 | - |
| TC0100005214.oe.1 | 3.94  | 1.98  | 3.94 | up   | 4.91  | 2.93  | Inc-SLC30A1 NONCODE     | cl Inc-SLC30A1 NONHSAT0(   | chr1 | 219080975 | 219173961 | - |
| TC0100005254.oe.1 | 2.95  | 1.56  | 2.95 | up   | 6.56  | 4.99  | Inc-TAF1A- LNCipedia    | lc Inc-TAF1A-2 NONHSAT0(   | chr1 | 222538729 | 222540103 | - |
| TC0100005255.oe.1 | 2.01  | 1.01  | 2.01 | up   | 8.88  | 7.87  | Inc-HHIPL2- LNCipedia   | lc Inc-HHIPL2- NONHSAT0(   | chr1 | 222568829 | 222570563 | - |
| TC0100005328.oe.1 | 2.13  | 1.09  | 2.13 | up   | 9.25  | 8.15  | Inc-WNT9A- NONCODE      | cl Inc-WNT9A- NONHSAT0(    | chr1 | 227733619 | 227734371 | - |
| TC0100005439.oe.1 | -2.69 | -1.43 | 2.69 | down | 6.06  | 7.49  | Inc-RBM34- NONCODE      | cl Inc-RBM34- NONHSAT0(    | chr1 | 235172647 | 235175643 | - |
| TC0100005497.oe.1 | -3.36 | -1.75 | 3.36 | down | 7.11  | 8.85  | Inc-CHML-1 LNCipedia    | lc Inc-CHML-1 NONHSAT0(    | chr1 | 241628853 | 241631422 | - |
| TC0100005536.oe.1 | -2.04 | -1.03 | 2.04 | down | 5.71  | 6.74  | Inc-HNRNP LNCipedia     | lc Inc-HNRNP LNCipedia     | chr1 | 244840243 | 244855497 | - |
| TC0100005559.oe.1 | -2.36 | -1.24 | 2.36 | down | 5.35  | 6.59  | Inc-AHCTF1 gene_id XLO  | Inc-AHCTF1 NONHSAT0(       | chr1 | 246785650 | 246786104 | - |
| TC0100005568.oe.1 | -2.04 | -1.03 | 2.04 | down | 4.80  | 5.83  | NONHSAG0 NONCODE        | cl Inc-ZNF124- NONHSAT0(   | chr1 | 247187281 | 247188526 | - |
| TC01001053.hg.4   | 2.05  | 1.04  | 2.05 | up   | 4.46  | 3.43  | EMBP1 embigin pse       | --- ---                    | chr1 | 121519112 | 121571888 | + |
| TC01001487.hg.4   | 2.11  | 1.08  | 2.11 | up   | 4.06  | 2.99  | FMO6P flavin contain    | --- ---                    | chr1 | 171137740 | 171161568 | + |
| TC01001517.hg.4   | -2.28 | -1.19 | 2.28 | down | 3.67  | 4.86  | GAS5-AS1 GAS5 antiser   | --- ---                    | chr1 | 173862152 | 173863941 | + |
| TC01003095.hg.4   | -2.70 | -1.43 | 2.70 | down | 3.66  | 5.09  | PFN1P2 profilin 1 pse   | --- ---                    | chr1 | 149084551 | 149086462 | + |
| TC01006390.hg.4   | -4.64 | -2.22 | 4.64 | down | 6.49  | 8.71  | HNRNP A non-protein     | --- ---                    | chr1 | 244840638 | 244846941 | - |
| TC01006409.hg.4   | -2.04 | -1.03 | 2.04 | down | 3.78  | 4.81  | C1ORF220// chromosome   | --- ---                    | chr1 | 178542752 | 178548889 | + |
| TC01006415.hg.4   | -2.09 | -1.06 | 2.09 | down | 3.34  | 4.40  | RP11-267N1 regulator of | --- ---                    | chr1 | 163244505 | 163321894 | - |
| TC0200000007.oe.1 | -2.87 | -1.52 | 2.87 | down | 3.27  | 4.80  | Inc-ACP1-1 LNCipedia    | lc Inc-ACP1-1: ---         | chr2 | 307912    | 332118    | + |

|                   |       |       |      |      |       |       |                         |                          |      |           |           |   |
|-------------------|-------|-------|------|------|-------|-------|-------------------------|--------------------------|------|-----------|-----------|---|
| TC0200000133.oe.1 | 2.04  | 1.03  | 2.04 | up   | 6.72  | 5.68  | Inc-C2orf50- LNCipedia  | lc Inc-C2orf50- NONHSAT0 | chr2 | 11172012  | 11178168  | + |
| TC0200000210.oe.1 | -3.18 | -1.67 | 3.18 | down | 3.16  | 4.83  | Inc-KCNS3-: gene_id XLO | Inc-KCNS3-: NONHSAT0     | chr2 | 18550772  | 18553219  | + |
| TC0200000212.oe.1 | 2.10  | 1.07  | 2.10 | up   | 4.00  | 2.94  | Inc-KCNS3- LNCipedia    | lc Inc-KCNS3-: ---       | chr2 | 18648288  | 18651233  | + |
| TC0200000355.oe.1 | -2.05 | -1.04 | 2.05 | down | 3.12  | 4.16  | Inc-LBH-4 LNCipedia     | lc Inc-LBH-4:1 ---       | chr2 | 30200163  | 30205935  | + |
| TC0200000495.oe.1 | -2.30 | -1.20 | 2.30 | down | 4.60  | 5.81  | Inc-SLC3A1- LNCipedia   | lc Inc-SLC3A1- NONHSAT0  | chr2 | 44395310  | 44396393  | + |
| TC0200000511.oe.1 | -2.65 | -1.41 | 2.65 | down | 3.00  | 4.41  | Inc-RHOQ- LNCipedia     | lc Inc-RHOQ-: ---        | chr2 | 46522374  | 46524282  | + |
| TC0200000577.oe.1 | -2.76 | -1.46 | 2.76 | down | 2.74  | 4.20  | Inc-C2orf73- LNCipedia  | lc Inc-C2orf73- ---      | chr2 | 54516636  | 54517678  | + |
| TC0200000610.oe.1 | 2.01  | 1.01  | 2.01 | up   | 11.96 | 10.96 | Inc-VRK2-8 NONCODE      | cl Inc-VRK2-8: NONHSAT0  | chr2 | 58046642  | 58159920  | + |
| TC0200000659.oe.1 | -2.03 | -1.02 | 2.03 | down | 3.89  | 4.91  | Inc-OTX1-7 LNCipedia    | lc Inc-OTX1-7: NONHSAT0  | chr2 | 62766549  | 62766968  | + |
| TC0200000731.oe.1 | 2.06  | 1.05  | 2.06 | up   | 7.73  | 6.68  | Inc-PNO1-1 LNCipedia    | lc Inc-PNO1-1 ---        | chr2 | 68179833  | 68180532  | + |
| TC0200000750.oe.1 | 2.30  | 1.20  | 2.30 | up   | 5.37  | 4.17  | Inc-SNRNP2 LNCipedia    | lc Inc-SNRNP2 NONHSAT0   | chr2 | 69938152  | 69942942  | + |
| TC0200000787.oe.1 | -2.55 | -1.35 | 2.55 | down | 5.65  | 7.00  | Inc-DYSF-8 NONCODE      | cl Inc-DYSF-8: NONHSAT0  | chr2 | 71379516  | 71398757  | + |
| TC0200000788.oe.1 | -2.10 | -1.07 | 2.10 | down | 9.96  | 11.03 | Inc-DYSF-7 NONCODE      | cl Inc-DYSF-7: NONHSAT0  | chr2 | 71403850  | 71426606  | + |
| TC0200000859.oe.1 | -2.90 | -1.54 | 2.90 | down | 5.08  | 6.62  | RP11-342K6 LNCipedia    | lc Inc-POLE4-: NONHSAT0  | chr2 | 75660462  | 75662208  | + |
| TC0200000951.oe.1 | 2.13  | 1.09  | 2.13 | up   | 10.91 | 9.81  | Inc-PLGLB2- LNCipedia   | lc Inc-PLGLB2- NONHSAT0  | chr2 | 87710443  | 87714232  | + |
| TC0200000967.oe.1 | -2.02 | -1.02 | 2.02 | down | 4.95  | 5.97  | Inc-RPIA-1 NONCODE      | cl Inc-RPIA-1:1 NONHSAT0 | chr2 | 88765807  | 88806612  | + |
| TC0200000993.oe.1 | 2.19  | 1.13  | 2.19 | up   | 3.64  | 2.51  | CH17-132F2 N/A          | --- ---                  | chr2 | 90365737  | 90367699  | + |
| TC0200001005.oe.1 | -2.05 | -1.04 | 2.05 | down | 4.20  | 5.24  | Inc-AC0734- LNCipedia   | lc Inc-AC0734- NONHSAT0  | chr2 | 92130438  | 92136243  | + |
| TC0200001131.oe.1 | 2.06  | 1.05  | 2.06 | up   | 8.58  | 7.53  | Inc-TMEM1 LNCipedia     | lc Inc-TMEM1: NONHSAT0   | chr2 | 102689694 | 102702451 | + |
| TC0200001200.oe.1 | -2.50 | -1.32 | 2.50 | down | 5.34  | 6.66  | Inc-LIMS1-4 NONCODE     | cl Inc-LIMS1-4 NONHSAT0  | chr2 | 108471814 | 108475161 | + |
| TC0200001278.oe.1 | 2.21  | 1.15  | 2.21 | up   | 5.55  | 4.41  | Inc-PSD4-2 LNCipedia    | lc Inc-PSD4-2: NONHSAT0  | chr2 | 113205926 | 113209396 | + |
| TC0200001346.oe.1 | 2.04  | 1.03  | 2.04 | up   | 4.30  | 3.27  | Inc-GLI2-6 NONCODE      | cl Inc-GLI2-6:1 NONHSAT0 | chr2 | 120735623 | 120951763 | + |
| TC0200001435.oe.1 | 2.23  | 1.16  | 2.23 | up   | 7.46  | 6.30  | Inc-PTPN18- LNCipedia   | lc Inc-PTPN18- NONHSAT0  | chr2 | 130342897 | 130345020 | + |
| TC0200001470.oe.1 | -2.07 | -1.05 | 2.07 | down | 12.17 | 13.22 | Inc-GPR39- LNCipedia    | lc Inc-GPR39-: NONHSAT0  | chr2 | 132255493 | 132255912 | + |
| TC0200001516.oe.1 | -2.06 | -1.04 | 2.06 | down | 2.67  | 3.72  | Inc-THSD7B LNCipedia    | lc Inc-THSD7B ---        | chr2 | 137693347 | 137693561 | + |
| TC0200001544.oe.1 | 3.49  | 1.80  | 3.49 | up   | 12.94 | 11.13 | Inc-ARHGAF NONCODE      | cl Inc-ARHGAF NONHSAT0   | chr2 | 142918679 | 142958075 | + |
| TC0200001574.oe.1 | 2.16  | 1.11  | 2.16 | up   | 3.99  | 2.88  | Inc-ACVR2A NONCODE      | cl Inc-ACVR2A NONHSAT0   | chr2 | 146477427 | 146478113 | + |
| TC0200001586.oe.1 | -2.34 | -1.23 | 2.34 | down | 4.24  | 5.46  | RP11-567F1 N/A          | --- ---                  | chr2 | 148062154 | 148062577 | + |
| TC0200001740.oe.1 | -2.97 | -1.57 | 2.97 | down | 5.03  | 6.60  | Inc-PHOSPH LNCipedia    | lc Inc-PHOSPH NONHSAT0   | chr2 | 169639482 | 169641403 | + |
| TC0200001795.oe.1 | -2.62 | -1.39 | 2.62 | down | 4.42  | 5.81  | RP11-39411 LNCipedia    | lc Inc-SP9-7:1 NONHSAT0  | chr2 | 173968351 | 173969418 | + |
| TC0200001798.oe.1 | -2.16 | -1.11 | 2.16 | down | 3.14  | 4.25  | Inc-SP9-5 LNCipedia     | lc Inc-SP9-5:1 ---       | chr2 | 174195610 | 174196656 | + |
| TC0200001847.oe.1 | 2.36  | 1.24  | 2.36 | up   | 6.66  | 5.42  | Inc-OSBPL6- NONCODE     | cl Inc-OSBPL6- NONHSAT0  | chr2 | 178121004 | 178124290 | + |
| TC0200001876.oe.1 | 2.42  | 1.28  | 2.42 | up   | 3.88  | 2.61  | Inc-PLEKHA- NONCODE     | cl Inc-PLEKHA-: NONHSAT0 | chr2 | 179657779 | 179660393 | + |
| TC0200001944.oe.1 | 2.01  | 1.01  | 2.01 | up   | 5.67  | 4.66  | Inc-MFSD6- NONCODE      | cl Inc-MFSD6- NONHSAT0   | chr2 | 190343930 | 190366730 | + |
| TC0200001956.oe.1 | -2.04 | -1.03 | 2.04 | down | 5.76  | 6.79  | Inc-OBFC2A NONCODE      | cl Inc-OBFC2A NONHSAT0   | chr2 | 191407658 | 191409073 | + |
| TC0200002074.oe.1 | 3.25  | 1.70  | 3.25 | up   | 5.25  | 3.55  | Inc-ALS2CR LNCipedia    | lc Inc-ALS2CR: NONHSAT0  | chr2 | 203083499 | 203085008 | + |
| TC0200002125.oe.1 | 2.01  | 1.01  | 2.01 | up   | 11.25 | 10.24 | Inc-CREB1- LNCipedia    | lc Inc-CREB1-: NONHSAT0  | chr2 | 207750685 | 207753875 | + |
| TC0200002135.oe.1 | 2.97  | 1.57  | 2.97 | up   | 6.85  | 5.29  | Inc-UNC80- LNCipedia    | lc Inc-UNC80- NONHSAT0   | chr2 | 209661465 | 209710812 | + |
| TC0200002202.oe.1 | -2.37 | -1.25 | 2.37 | down | 2.97  | 4.22  | Inc-AC0075- LNCipedia   | lc Inc-AC0075: NONHSAT0  | chr2 | 216821131 | 216831633 | + |
| TC0200002307.oe.1 | -5.39 | -2.43 | 5.39 | down | 7.15  | 9.58  | Inc-KCNE4- LNCipedia    | lc Inc-KCNE4-: NONHSAT0  | chr2 | 222942942 | 222944636 | + |
| TC0200002328.oe.1 | -2.18 | -1.12 | 2.18 | down | 3.59  | 4.72  | NONHSAG0 NONCODE        | cl Inc-RHBDD1 NONHSAT0   | chr2 | 226804036 | 226805061 | + |
| TC0200002337.oe.1 | 2.03  | 1.02  | 2.03 | up   | 9.42  | 8.40  | Inc-COL4A3 LNCipedia    | lc Inc-COL4A3 NONHSAT0   | chr2 | 227355298 | 227357181 | + |
| TC0200002378.oe.1 | 2.90  | 1.54  | 2.90 | up   | 5.99  | 4.45  | Inc-PSMD1- LNCipedia    | lc Inc-PSMD1- NONHSAT0   | chr2 | 231258965 | 231278427 | + |
| TC0200002771.oe.1 | 2.07  | 1.05  | 2.07 | up   | 4.53  | 3.49  | Inc-RDH14- NONCODE      | cl Inc-RDH14- NONHSAT0   | chr2 | 18547386  | 18548204  | - |
| TC0200002831.oe.1 | 2.03  | 1.02  | 2.03 | up   | 7.19  | 6.17  | Inc-TP53I3- LNCipedia   | lc Inc-TP53I3-: NONHSAT0 | chr2 | 24073649  | 24076373  | - |
| TC0200002936.oe.1 | 2.42  | 1.27  | 2.42 | up   | 4.82  | 3.55  | Inc-CAPN14 LNCipedia    | lc Inc-CAPN14 NONHSAT0   | chr2 | 31383082  | 31384395  | - |
| TC0200003023.oe.1 | 2.43  | 1.28  | 2.43 | up   | 5.31  | 4.03  | Inc-CDKL4- LNCipedia    | lc Inc-CDKL4-: ---       | chr2 | 39323328  | 39323804  | - |
| TC0200003146.oe.1 | -2.15 | -1.10 | 2.15 | down | 2.87  | 3.97  | Inc-GPR75- LNCipedia    | lc Inc-GPR75-: ---       | chr2 | 53616465  | 53618384  | - |
| TC0200003413.oe.1 | 2.04  | 1.03  | 2.04 | up   | 8.33  | 7.30  | Inc-SLC4A5- LNCipedia   | lc Inc-SLC4A5- NONHSAT0  | chr2 | 74361155  | 74369395  | - |

|                   |       |       |       |      |       |       |                                                    |           |           |   |
|-------------------|-------|-------|-------|------|-------|-------|----------------------------------------------------|-----------|-----------|---|
| TC0200003458.oe.1 | -2.48 | -1.31 | 2.48  | down | 2.77  | 4.08  | Inc-REG1B-4 gene_id XLOC Inc-REG1B-4 NONHSAT0 chr2 | 78597911  | 78599406  | - |
| TC0200003631.oe.1 | -3.42 | -1.78 | 3.42  | down | 10.66 | 12.43 | Inc-GPAT2-1 LNCipedia lc Inc-GPAT2-1 NONHSAT0 chr2 | 95857340  | 95867471  | - |
| TC0200003632.oe.1 | -2.18 | -1.12 | 2.18  | down | 5.34  | 6.46  | Inc-GPAT2-1 LNCipedia lc Inc-GPAT2-1 --- chr2      | 95891657  | 95896022  | - |
| TC0200003633.oe.1 | -2.02 | -1.01 | 2.02  | down | 4.46  | 5.47  | Inc-GPAT2-4 LNCipedia lc Inc-GPAT2-4 NONHSAT0 chr2 | 95936811  | 95939208  | - |
| TC0200003634.oe.1 | -2.54 | -1.35 | 2.54  | down | 7.58  | 8.92  | Inc-GPAT2-1 LNCipedia lc Inc-GPAT2-1 NONHSAT0 chr2 | 95945114  | 95960664  | - |
| TC0200003635.oe.1 | -2.07 | -1.05 | 2.07  | down | 9.25  | 10.30 | Inc-GPAT2-1 LNCipedia lc Inc-GPAT2-1 NONHSAT0 chr2 | 95978127  | 95986839  | - |
| TC0200003669.oe.1 | -2.61 | -1.38 | 2.61  | down | 4.29  | 5.68  | NONHSAG0 LNCipedia lc Inc-AC10841 NONHSAT0 chr2    | 97416067  | 97433527  | - |
| TC0200003670.oe.1 | -2.22 | -1.15 | 2.22  | down | 8.14  | 9.29  | Inc-AC10841 LNCipedia lc Inc-AC10841 NONHSAT0 chr2 | 97492514  | 97511249  | - |
| TC0200003712.oe.1 | 2.16  | 1.11  | 2.16  | up   | 4.28  | 3.17  | Inc-RFX8-1 gene_id XLOC Inc-RFX8-1:1 NONHSAT0 chr2 | 101551603 | 101567908 | - |
| TC0200003823.oe.1 | 2.22  | 1.15  | 2.22  | up   | 8.04  | 6.90  | NONHSAG0 NONCODE c Inc-AC10841 NONHSAT0 chr2       | 111491943 | 111494811 | - |
| TC0200003843.oe.1 | 4.51  | 2.17  | 4.51  | up   | 6.41  | 4.24  | Inc-IL1A-3 LNCipedia lc Inc-IL1A-3:1 NONHSAT0 chr2 | 112835181 | 112836779 | - |
| TC0200003860.oe.1 | -2.49 | -1.32 | 2.49  | down | 6.77  | 8.09  | Inc-AC01674 NONCODE c Inc-AC01674 NONHSAT0 chr2    | 113706793 | 113710239 | - |
| TC0200004024.oe.1 | 2.36  | 1.24  | 2.36  | up   | 5.89  | 4.65  | RP11-725P1 LNCipedia lc Inc-ANKRD3 --- chr2        | 132345616 | 132347297 | - |
| TC0200004066.oe.1 | 12.06 | 3.59  | 12.06 | up   | 7.94  | 4.35  | Inc-LRP1B-4 NONCODE c Inc-LRP1B-4 NONHSAT0 chr2    | 142870588 | 142871067 | - |
| TC0200004139.oe.1 | -2.59 | -1.37 | 2.59  | down | 4.99  | 6.37  | Inc-AC02341 NONCODE c Inc-AC02341 NONHSAT0 chr2    | 150955591 | 150956046 | - |
| TC0200004217.oe.1 | -2.30 | -1.20 | 2.30  | down | 3.01  | 4.21  | Inc-RBMS1- LNCipedia lc Inc-RBMS1- NONHSAT0 chr2   | 161048606 | 161050546 | - |
| TC0200004250.oe.1 | -2.19 | -1.13 | 2.19  | down | 3.08  | 4.21  | Inc-COBL1- NONCODE c Inc-COBL1- NONHSAT0 chr2      | 164898528 | 164939503 | - |
| TC0200004334.oe.1 | -2.16 | -1.11 | 2.16  | down | 7.21  | 8.31  | Inc-OLA1-5 LNCipedia lc Inc-OLA1-5:1 NONHSAT0 chr2 | 173908532 | 173916832 | - |
| TC0200004364.oe.1 | -2.12 | -1.09 | 2.12  | down | 7.21  | 8.30  | Inc-CHN1-5 NONCODE c Inc-CHN1-5 NONHSAT0 chr2      | 175072252 | 175074044 | - |
| TC0200004413.oe.1 | -2.72 | -1.44 | 2.72  | down | 5.14  | 6.58  | Inc-CCDC14 LNCipedia lc Inc-CCDC14 NONHSAT0 chr2   | 179102280 | 179104484 | - |
| TC0200004433.oe.1 | 2.01  | 1.00  | 2.01  | up   | 3.48  | 2.47  | Inc-NEURO1 LNCipedia lc Inc-NEURO1 NONHSAT0 chr2   | 182140483 | 182141627 | - |
| TC0200004512.oe.1 | -2.09 | -1.06 | 2.09  | down | 5.10  | 6.16  | Inc-C2orf66 LNCipedia lc Inc-C2orf66 NONHSAT0 chr2 | 196837871 | 196842825 | - |
| TC0200004522.oe.1 | -2.16 | -1.11 | 2.16  | down | 10.77 | 11.88 | Inc-ANKRD4 LNCipedia lc Inc-ANKRD4 NONHSAT0 chr2   | 197392255 | 197393351 | - |
| TC0200004524.oe.1 | -2.04 | -1.03 | 2.04  | down | 8.81  | 9.84  | Inc-HSPD1- LNCipedia lc Inc-HSPD1- NONHSAT0 chr2   | 197409783 | 197435047 | - |
| TC0200004619.oe.1 | -2.23 | -1.16 | 2.23  | down | 3.18  | 4.34  | Inc-METTL2 LNCipedia lc Inc-METTL2 NONHSAT0 chr2   | 207673744 | 207673959 | - |
| TC0200004621.oe.1 | 3.00  | 1.58  | 3.00  | up   | 5.67  | 4.09  | OTTHUMG01 NONCODE c Inc-PLEKHM NONHSAT0 chr2       | 207821290 | 207822769 | - |
| TC0200004872.oe.1 | -2.33 | -1.22 | 2.33  | down | 5.19  | 6.41  | Inc-AC11272 LNCipedia lc Inc-AC11272 NONHSAT0 chr2 | 237338940 | 237340602 | - |
| TC0200004907.oe.1 | -2.05 | -1.04 | 2.05  | down | 6.18  | 7.21  | Inc-AC01702 LNCipedia lc Inc-AC01702 NONHSAT0 chr2 | 239345520 | 239346621 | - |
| TC02000912.hg.4   | -2.46 | -1.30 | 2.46  | down | 4.32  | 5.62  | TEX41//LOC uncharacteri --- --- chr2               | 144667967 | 145182649 | + |
| TC0300000020.oe.1 | -2.82 | -1.50 | 2.82  | down | 5.46  | 6.96  | Inc-TRNT1-1 LNCipedia lc Inc-TRNT1-1 NONHSAT0 chr3 | 3149140   | 3154190   | + |
| TC0300000058.oe.1 | -2.10 | -1.07 | 2.10  | down | 5.03  | 6.10  | Inc-THUMPF LNCipedia lc Inc-THUMPF --- chr3        | 9405780   | 9407229   | + |
| TC0300000059.oe.1 | -2.00 | -1.00 | 2.00  | down | 6.08  | 7.09  | Inc-THUMPF LNCipedia lc Inc-THUMPF --- chr3        | 9408357   | 9408669   | + |
| TC0300000062.oe.1 | -2.40 | -1.27 | 2.40  | down | 5.20  | 6.47  | Inc-THUMPF LNCipedia lc Inc-THUMPF --- chr3        | 9443472   | 9443729   | + |
| TC0300000087.oe.1 | -2.05 | -1.04 | 2.05  | down | 6.42  | 7.46  | RP11-1020A LNCipedia lc Inc-CRELD1 NONHSAT0 chr3   | 9958717   | 9962539   | + |
| TC0300000088.oe.1 | 2.23  | 1.16  | 2.23  | up   | 8.81  | 7.65  | Inc-FANCD2 NONCODE c Inc-FANCD2 NONHSAT0 chr3      | 9986893   | 10007003  | + |
| TC0300000158.oe.1 | -2.00 | -1.00 | 2.00  | down | 2.48  | 3.48  | Inc-BTD-3 LNCipedia lc Inc-BTD-3:1 NONHSAT0 chr3   | 15740220  | 15762186  | + |
| TC0300000194.oe.1 | -2.92 | -1.54 | 2.92  | down | 3.16  | 4.71  | Inc-KAT2B-1 LNCipedia lc Inc-KAT2B-1 --- chr3      | 20161384  | 20169413  | + |
| TC0300000201.oe.1 | -2.15 | -1.11 | 2.15  | down | 4.77  | 5.88  | Inc-KAT2B-1 LNCipedia lc Inc-KAT2B-1 NONHSAT0 chr3 | 20969528  | 20970379  | + |
| TC0300000353.oe.1 | 3.08  | 1.62  | 3.08  | up   | 7.77  | 6.15  | Inc-SLC25A3 NONCODE c Inc-SLC25A3 NONHSAT0 chr3    | 39406718  | 39408195  | + |
| TC0300000424.oe.1 | -2.03 | -1.02 | 2.03  | down | 2.84  | 3.86  | Inc-ZNF35-4 LNCipedia lc Inc-ZNF35-4 NONHSAT0 chr3 | 44682202  | 44684044  | + |
| TC0300000495.oe.1 | 2.62  | 1.39  | 2.62  | up   | 5.50  | 4.11  | Inc-CCDC36 LNCipedia lc Inc-CCDC36 NONHSAT0 chr3   | 49174933  | 49176402  | + |
| TC0300000532.oe.1 | 2.43  | 1.28  | 2.43  | up   | 5.77  | 4.50  | Inc-RAD54L NONCODE c Inc-RAD54L NONHSAT0 chr3      | 51541144  | 51541870  | + |
| TC0300000576.oe.1 | 2.11  | 1.08  | 2.11  | up   | 4.80  | 3.72  | Inc-IL17RB-2 NONCODE c Inc-IL17RB-2 NONHSAT0 chr3  | 54272774  | 54320541  | + |
| TC0300000625.oe.1 | -2.23 | -1.16 | 2.23  | down | 3.09  | 4.25  | Inc-PTPRG-4 NONCODE c Inc-PTPRG-4 NONHSAT0 chr3    | 61409560  | 61413179  | + |
| TC0300000685.oe.1 | -2.00 | -1.00 | 2.00  | down | 2.85  | 3.85  | Inc-MITF-12 LNCipedia lc Inc-MITF-12 NONHSAT0 chr3 | 70751123  | 70751350  | + |
| TC0300000787.oe.1 | -2.03 | -1.02 | 2.03  | down | 8.05  | 9.07  | Inc-EPHA3-2 NONCODE c Inc-EPHA3-2 NONHSAT0 chr3    | 90414967  | 90427984  | + |
| TC0300000795.oe.1 | -2.67 | -1.42 | 2.67  | down | 13.11 | 14.53 | Inc-EPHA6-1 NONCODE c Inc-EPHA6-1 NONHSAT0 chr3    | 96617185  | 96618195  | + |
| TC0300000838.oe.1 | 3.17  | 1.66  | 3.17  | up   | 6.05  | 4.39  | Inc-GPR128 LNCipedia lc Inc-GPR128 NONHSAT0 chr3   | 100519239 | 100556972 | + |
| TC0300000839.oe.1 | 2.62  | 1.39  | 2.62  | up   | 4.84  | 3.45  | Inc-GPR128 NONCODE c Inc-GPR128 NONHSAT0 chr3      | 100571030 | 100577065 | + |

|                   |       |       |      |      |       |       |                                                    |           |           |   |
|-------------------|-------|-------|------|------|-------|-------|----------------------------------------------------|-----------|-----------|---|
| TC0300000956.oe.1 | 2.04  | 1.03  | 2.04 | up   | 7.30  | 6.27  | Inc-ZDHC2 NONCODE c Inc-ZDHC2 NONHSAT0 chr3        | 114056740 | 114070806 | + |
| TC0300001035.oe.1 | 2.23  | 1.16  | 2.23 | up   | 4.19  | 3.03  | Inc-SLC15A2 LNCipedia lc Inc-SLC15A2 NONHSAT0 chr3 | 121835209 | 121837776 | + |
| TC0300001188.oe.1 | -2.13 | -1.09 | 2.13 | down | 3.21  | 4.30  | Inc-SRPRB-3 LNCipedia lc Inc-SRPRB-3 NONHSAT0 chr3 | 133760300 | 133762363 | + |
| TC0300001355.oe.1 | 3.10  | 1.63  | 3.10 | up   | 7.24  | 5.61  | Inc-AADACL NONCODE c Inc-AADACL NONHSAT0 chr3      | 151770428 | 151784894 | + |
| TC0300001356.oe.1 | 8.66  | 3.11  | 8.66 | up   | 9.72  | 6.61  | NONHSAG0 NONCODE c Inc-AADAC- NONHSAT0 chr3        | 151797484 | 151808249 | + |
| TC0300001364.oe.1 | -2.37 | -1.24 | 2.37 | down | 9.04  | 10.28 | Inc-MBNL1- LNCipedia lc Inc-MBNL1- NONHSAT0 chr3   | 152457691 | 152465780 | + |
| TC0300001400.oe.1 | -2.12 | -1.08 | 2.12 | down | 4.35  | 5.43  | Inc-MME-6 LNCipedia lc Inc-MME-6: NONHSAT0 chr3    | 155277709 | 155283378 | + |
| TC0300001516.oe.1 | -2.64 | -1.40 | 2.64 | down | 9.84  | 11.23 | Inc-SKIL-4 LNCipedia lc Inc-SKIL-4:1 NONHSAT0 chr3 | 170394617 | 170397227 | + |
| TC0300001544.oe.1 | 2.16  | 1.11  | 2.16 | up   | 3.75  | 2.64  | Inc-FNDC3B LNCipedia lc Inc-FNDC3B NONHSAT0 chr3   | 172522228 | 172522444 | + |
| TC0300001659.oe.1 | 2.29  | 1.20  | 2.29 | up   | 11.25 | 10.05 | Inc-FAM131 LNCipedia lc Inc-FAM131 NONHSAT0 chr3   | 184328669 | 184331853 | + |
| TC0300001678.oe.1 | -2.04 | -1.03 | 2.04 | down | 5.23  | 6.26  | Inc-MAP3K1 LNCipedia lc Inc-MAP3K1 NONHSAT0 chr3   | 184982418 | 184996501 | + |
| TC0300001680.oe.1 | 2.31  | 1.21  | 2.31 | up   | 5.82  | 4.62  | Inc-SEN2-1 LNCipedia lc Inc-SEN2-1 NONHSAT0 chr3   | 185443475 | 185447957 | + |
| TC0300001767.oe.1 | -2.34 | -1.22 | 2.34 | down | 6.12  | 7.34  | Inc-HES1-6 LNCipedia lc Inc-HES1-6: NONHSAT0 chr3  | 194145674 | 194145967 | + |
| TC0300001883.oe.1 | 2.63  | 1.39  | 2.63 | up   | 6.01  | 4.62  | Inc-AC0188: NONCODE c Inc-AC0188: NONHSAT0 chr3    | 4814294   | 4887293   | - |
| TC0300001939.oe.1 | 2.09  | 1.06  | 2.09 | up   | 14.45 | 13.39 | Inc-GHRL-1 LNCipedia lc Inc-GHRL-1: NONHSAT0 chr3  | 10300932  | 10301332  | - |
| TC0300002063.oe.1 | -2.15 | -1.10 | 2.15 | down | 5.09  | 6.19  | Inc-TOP2B-! LNCipedia lc Inc-TOP2B-! --- chr3      | 25358112  | 25359922  | - |
| TC0300002076.oe.1 | -3.40 | -1.76 | 3.40 | down | 3.53  | 5.30  | Inc-SLC4A7- LNCipedia lc Inc-SLC4A7- NONHSAT0 chr3 | 27278688  | 27284901  | - |
| TC0300002376.oe.1 | 3.55  | 1.83  | 3.55 | up   | 10.89 | 9.06  | Inc-ABHD14 NONCODE c Inc-ABHD14 NONHSAT0 chr3      | 51994935  | 51995895  | - |
| TC0300002507.oe.1 | -2.38 | -1.25 | 2.38 | down | 4.78  | 6.03  | Inc-LMOD3- LNCipedia lc Inc-LMOD3- NONHSAT0 chr3   | 69196719  | 69250248  | - |
| TC0300002591.oe.1 | 3.05  | 1.61  | 3.05 | up   | 4.84  | 3.23  | Inc-STX19-1 NONCODE c Inc-STX19-1 NONHSAT0 chr3    | 93906040  | 93911157  | - |
| TC0300002607.oe.1 | 3.46  | 1.79  | 3.46 | up   | 11.45 | 9.65  | Inc-CLDND1 NONCODE c Inc-CLDND1 NONHSAT0 chr3      | 98525061  | 98525274  | - |
| TC0300002717.oe.1 | -2.39 | -1.26 | 2.39 | down | 5.84  | 7.10  | Inc-ZBTB20- NONCODE c Inc-ZBTB20- NONHSAT0 chr3    | 114314501 | 114333920 | - |
| TC0300002745.oe.1 | -2.00 | -1.00 | 2.00 | down | 4.27  | 5.27  | Inc-POPDC2 LNCipedia lc Inc-POPDC2 NONHSAT0 chr3   | 119670764 | 119672338 | - |
| TC0300002751.oe.1 | -2.26 | -1.18 | 2.26 | down | 7.67  | 8.84  | Inc-GPR156- LNCipedia lc Inc-GPR156- NONHSAT0 chr3 | 120325331 | 120328350 | - |
| TC0300002780.oe.1 | -2.20 | -1.14 | 2.20 | down | 5.82  | 6.96  | Inc-PTPLB-4 LNCipedia lc Inc-PTPLB-4 NONHSAT0 chr3 | 123640379 | 123649064 | - |
| TC0300002861.oe.1 | 2.29  | 1.20  | 2.29 | up   | 7.88  | 6.68  | Inc-PLXND1 LNCipedia lc Inc-PLXND1 NONHSAT0 chr3   | 129847048 | 129847957 | - |
| TC0300002892.oe.1 | -2.12 | -1.09 | 2.12 | down | 7.79  | 8.87  | Inc-RAB6B-2 NONCODE c Inc-RAB6B-2 NONHSAT0 chr3    | 133616821 | 133617526 | - |
| TC0300002936.oe.1 | -2.09 | -1.06 | 2.09 | down | 5.59  | 6.65  | Inc-CEP70-1 LNCipedia lc Inc-CEP70-1 NONHSAT0 chr3 | 138657283 | 138663933 | - |
| TC0300003010.oe.1 | 2.58  | 1.37  | 2.58 | up   | 4.48  | 3.11  | Inc-ZIC4-2/ gene_id XLO Inc-ZIC4-2:1 NONHSAT0 chr3 | 147844123 | 147846657 | - |
| TC0300003019.oe.1 | -3.25 | -1.70 | 3.25 | down | 12.02 | 13.72 | Inc-CP-3 NONCODE c Inc-CP-3:1 NONHSAT0 chr3        | 149050270 | 149060800 | - |
| TC0300003022.oe.1 | -2.93 | -1.55 | 2.93 | down | 12.92 | 14.47 | Inc-HLTF-5 LNCipedia lc Inc-HLTF-5: NONHSAT0 chr3  | 149173484 | 149176714 | - |
| TC0300003023.oe.1 | -2.14 | -1.10 | 2.14 | down | 12.16 | 13.26 | Inc-HLTF-6 LNCipedia lc Inc-HLTF-6: NONHSAT0 chr3  | 149185163 | 149188096 | - |
| TC0300003037.oe.1 | 2.29  | 1.20  | 2.29 | up   | 6.19  | 4.99  | Inc-ANKUB1 NONCODE c Inc-ANKUB1 NONHSAT0 chr3      | 150017256 | 150022750 | - |
| TC0300003098.oe.1 | -3.08 | -1.62 | 3.08 | down | 3.55  | 5.18  | Inc-SSR3-5 LNCipedia lc Inc-SSR3-5: NONHSAT0 chr3  | 156535066 | 156536901 | - |
| TC0300003139.oe.1 | -2.26 | -1.18 | 2.26 | down | 4.48  | 5.66  | Inc-TRIM59- LNCipedia lc Inc-TRIM59- NONHSAT0 chr3 | 160258403 | 160277478 | - |
| TC0300003149.oe.1 | -2.59 | -1.37 | 2.59 | down | 3.63  | 5.00  | Inc-B3GALN LNCipedia lc Inc-B3GALN NONHSAT0 chr3   | 161359299 | 161371517 | - |
| TC0300003194.oe.1 | -3.69 | -1.88 | 3.69 | down | 5.95  | 7.83  | Inc-LRRC31- NONCODE c Inc-LRRC31- NONHSAT0 chr3    | 170087584 | 170088850 | - |
| TC0300003202.oe.1 | 2.45  | 1.29  | 2.45 | up   | 10.50 | 9.20  | Inc-EIF5A2-: NONCODE c Inc-EIF5A2-: NONHSAT0 chr3  | 170865794 | 170868181 | - |
| TC0300003241.oe.1 | 2.34  | 1.22  | 2.34 | up   | 4.06  | 2.84  | Inc-TBL1XR1 LNCipedia lc Inc-TBL1XR1 NONHSAT0 chr3 | 176287186 | 176325154 | - |
| TC0300003247.oe.1 | -2.40 | -1.26 | 2.40 | down | 9.40  | 10.66 | Inc-ZMAT3- LNCipedia lc Inc-ZMAT3- NONHSAT0 chr3   | 177020754 | 177027830 | - |
| TC0300003284.oe.1 | 2.24  | 1.16  | 2.24 | up   | 4.35  | 3.19  | Inc-DNAJC1 LNCipedia lc Inc-DNAJC1 NONHSAT0 chr3   | 181563539 | 181565659 | - |
| TC0300003358.oe.1 | -2.04 | -1.03 | 2.04 | down | 12.06 | 13.08 | Inc-MASP1- LNCipedia lc Inc-MASP1- --- chr3        | 187413517 | 187413755 | - |
| TC0300003379.oe.1 | -2.13 | -1.09 | 2.13 | down | 2.86  | 3.95  | Inc-LEPREL1 LNCipedia lc Inc-LEPREL1 --- chr3      | 189448461 | 189459100 | - |
| TC0300003382.oe.1 | 2.05  | 1.03  | 2.05 | up   | 6.37  | 5.34  | Inc-TMEM2( NONCODE c Inc-TMEM2( NONHSAT0 chr3      | 190310169 | 190313218 | - |
| TC0300003402.oe.1 | -3.34 | -1.74 | 3.34 | down | 6.13  | 7.86  | Inc-ATP13A2 NONCODE l Inc-ATP13A2 NONHSAT0 chr3    | 193840828 | 193844024 | - |
| TC0300003410.oe.1 | -2.02 | -1.01 | 2.02 | down | 8.41  | 9.42  | Inc-GP5-1 LNCipedia lc Inc-GP5-1:1 NONHSAT0 chr3   | 194403465 | 194413063 | - |
| TC03000749.hg.4   | -2.23 | -1.16 | 2.23 | down | 3.27  | 4.43  | BPESC1 blepharophii --- --- chr3                   | 139104185 | 139125167 | + |
| TC03001476.hg.4   | -2.38 | -1.25 | 2.38 | down | 2.31  | 3.56  | ESRG embryonic si --- --- chr3                     | 54632124  | 54639857  | - |
| TC0400000003.oe.1 | -2.27 | -1.18 | 2.27 | down | 4.49  | 5.67  | CH17-262A2 N/A --- --- chr4                        | 149738    | 150317    | + |

|                   |        |       |       |      |       |       |                                                    |           |           |   |
|-------------------|--------|-------|-------|------|-------|-------|----------------------------------------------------|-----------|-----------|---|
| TC0400000137.oe.1 | 2.34   | 1.23  | 2.34  | up   | 8.49  | 7.27  | NONHSAG0 NONCODE c Inc-SORCS2 NONHSAT0 chr4        | 7754090   | 7778928   | + |
| TC0400000283.oe.1 | -2.37  | -1.24 | 2.37  | down | 8.76  | 10.00 | Inc-RBPJ-2 LNCipedia lc Inc-RBPJ-2:1 NONHSAT0 chr4 | 26432993  | 26434919  | + |
| TC0400000284.oe.1 | -2.11  | -1.08 | 2.11  | down | 4.67  | 5.74  | Inc-RBPJ-3 LNCipedia lc Inc-RBPJ-3:1 --- chr4      | 26466833  | 26468033  | + |
| TC0400000424.oe.1 | 2.28   | 1.19  | 2.28  | up   | 5.70  | 4.51  | Inc-GABRB1 LNCipedia lc Inc-GABRB1 NONHSAT0 chr4   | 47485297  | 47512846  | + |
| TC0400000459.oe.1 | 2.00   | 1.00  | 2.00  | up   | 9.29  | 8.29  | Inc-RASL11E LNCipedia lc Inc-RASL11E NONHSAT0 chr4 | 53442253  | 53453131  | + |
| TC0400000475.oe.1 | -2.20  | -1.13 | 2.20  | down | 3.14  | 4.28  | Inc-SRD5A3 NONCODE c Inc-SRD5A3 NONHSAT0 chr4      | 55053060  | 55092534  | + |
| TC0400000597.oe.1 | -2.39  | -1.26 | 2.39  | down | 4.51  | 5.77  | Inc-AFP-2 LNCipedia lc Inc-AFP-2:1 NONHSAT0 chr4   | 73418006  | 73419545  | + |
| TC0400000598.oe.1 | -2.02  | -1.02 | 2.02  | down | 4.11  | 5.13  | Inc-AFP-1 NONCODE c Inc-AFP-1:1 NONHSAT0 chr4      | 73419281  | 73421219  | + |
| TC0400000606.oe.1 | 5.68   | 2.51  | 5.68  | up   | 6.74  | 4.23  | Inc-CXCL6-2 LNCipedia lc Inc-CXCL6-2 NONHSAT0 chr4 | 73740569  | 73741986  | + |
| TC0400000607.oe.1 | 4.20   | 2.07  | 4.20  | up   | 5.46  | 3.39  | Inc-CXCL6-3 LNCipedia lc Inc-CXCL6-3 NONHSAT0 chr4 | 73743139  | 73743351  | + |
| TC0400000616.oe.1 | 2.58   | 1.36  | 2.58  | up   | 9.46  | 8.10  | Inc-EPGN-3 NONCODE c Inc-EPGN-3 NONHSAT0 chr4      | 74365173  | 74382013  | + |
| TC0400000617.oe.1 | 3.26   | 1.71  | 3.26  | up   | 10.20 | 8.49  | Inc-AREG-1 NONCODE c Inc-AREG-1:1 NONHSAT0 chr4    | 74382423  | 74384952  | + |
| TC0400000618.oe.1 | 2.92   | 1.55  | 2.92  | up   | 6.57  | 5.02  | Inc-EREG-1 NONCODE c Inc-EREG-1:1 NONHSAT0 chr4    | 74448639  | 74450532  | + |
| TC0400000628.oe.1 | 2.07   | 1.05  | 2.07  | up   | 6.49  | 5.44  | Inc-C4orf26 LNCipedia lc Inc-C4orf26 NONHSAT0 chr4 | 75539859  | 75546761  | + |
| TC0400000662.oe.1 | -3.66  | -1.87 | 3.66  | down | 4.65  | 6.53  | Inc-ANXA3 LNCipedia lc Inc-ANXA3 NONHSAT0 chr4     | 78913230  | 78916363  | + |
| TC0400000673.oe.1 | -2.13  | -1.09 | 2.13  | down | 3.03  | 4.12  | Inc-PRDM8 LNCipedia lc Inc-PRDM8 --- chr4          | 79819752  | 79842448  | + |
| TC0400000694.oe.1 | 2.02   | 1.02  | 2.02  | up   | 11.37 | 10.36 | Inc-MRPS18 NONCODE c Inc-MRPS18 NONHSAT0 chr4      | 83588258  | 83595335  | + |
| TC0400000695.oe.1 | 2.32   | 1.21  | 2.32  | up   | 13.13 | 11.91 | Inc-MRPS18 NONCODE c Inc-MRPS18 NONHSAT0 chr4      | 83598529  | 83605139  | + |
| TC0400000863.oe.1 | -2.06  | -1.04 | 2.06  | down | 3.92  | 4.96  | Inc-AP1AR LNCipedia lc Inc-AP1AR NONHSAT0 chr4     | 112321704 | 112322667 | + |
| TC0400000928.oe.1 | -2.16  | -1.11 | 2.16  | down | 7.40  | 8.51  | Inc-MYOZ2 LNCipedia lc Inc-MYOZ2 NONHSAT0 chr4     | 119267381 | 119273330 | + |
| TC0400000929.oe.1 | 2.05   | 1.04  | 2.05  | up   | 5.73  | 4.69  | Inc-AC1103 LNCipedia lc Inc-AC1103 NONHSAT0 chr4   | 119378132 | 119405615 | + |
| TC0400000973.oe.1 | -2.10  | -1.07 | 2.10  | down | 3.65  | 4.72  | Inc-SPRY1-5 LNCipedia lc Inc-SPRY1-5 --- chr4      | 123709458 | 123716405 | + |
| TC0400000993.oe.1 | -2.04  | -1.03 | 2.04  | down | 3.07  | 4.10  | Inc-LARP1B LNCipedia lc Inc-LARP1B --- chr4        | 128057217 | 128060178 | + |
| TC0400001087.oe.1 | 2.40   | 1.26  | 2.40  | up   | 4.41  | 3.15  | Inc-SMARCA LNCipedia lc Inc-SMARCA --- chr4        | 143601398 | 143615169 | + |
| TC0400001163.oe.1 | 2.07   | 1.05  | 2.07  | up   | 4.48  | 3.43  | NONHSAG0 NONCODE c Inc-ARFIP1 NONHSAT0 chr4        | 152337655 | 152338098 | + |
| TC0400001191.oe.1 | -2.18  | -1.12 | 2.18  | down | 7.60  | 8.72  | Inc-LRAT-2 LNCipedia lc Inc-LRAT-2:1 NONHSAT0 chr4 | 154563011 | 154566749 | + |
| TC0400001277.oe.1 | 5.11   | 2.35  | 5.11  | up   | 12.28 | 9.93  | Inc-PALLD-5 NONCODE c Inc-PALLD-5 NONHSAT0 chr4    | 168165241 | 168178315 | + |
| TC0400001288.oe.1 | 2.04   | 1.03  | 2.04  | up   | 6.91  | 5.88  | Inc-PALLD-6 NONCODE c Inc-PALLD-6 NONHSAT0 chr4    | 169721190 | 169723183 | + |
| TC0400001335.oe.1 | -2.03  | -1.02 | 2.03  | down | 3.02  | 4.04  | Inc-ADAM2 LNCipedia lc Inc-ADAM2 --- chr4          | 174760024 | 174766808 | + |
| TC0400001345.oe.1 | -2.29  | -1.19 | 2.29  | down | 6.99  | 8.18  | Inc-SPCS3-3 LNCipedia lc Inc-SPCS3-3 NONHSAT0 chr4 | 176296368 | 176296825 | + |
| TC0400001498.oe.1 | -2.03  | -1.02 | 2.03  | down | 3.45  | 4.47  | Inc-CPLX1-5 LNCipedia lc Inc-CPLX1-5 --- chr4      | 759255    | 759618    | - |
| TC0400001584.oe.1 | 2.17   | 1.12  | 2.17  | up   | 5.41  | 4.29  | Inc-EVC2-2 NONCODE c Inc-EVC2-2:1 NONHSAT0 chr4    | 5820784   | 5826861   | - |
| TC0400001692.oe.1 | -2.13  | -1.09 | 2.13  | down | 5.32  | 6.41  | Inc-LDB2-3 NONCODE c Inc-LDB2-3:1 NONHSAT0 chr4    | 17000658  | 17003611  | - |
| TC0400001705.oe.1 | -2.11  | -1.07 | 2.11  | down | 4.90  | 5.98  | Inc-DCAF16 LNCipedia lc Inc-DCAF16 NONHSAT0 chr4   | 17884122  | 17884763  | - |
| TC0400001804.oe.1 | -2.33  | -1.22 | 2.33  | down | 9.74  | 10.96 | Inc-C4orf34 LNCipedia lc Inc-C4orf34 NONHSAT0 chr4 | 39547301  | 39549586  | - |
| TC0400001809.oe.1 | -2.54  | -1.34 | 2.54  | down | 10.05 | 11.39 | Inc-C4orf34 LNCipedia lc Inc-C4orf34 NONHSAT0 chr4 | 39824798  | 39825359  | - |
| TC0400001810.oe.1 | -3.08  | -1.63 | 3.08  | down | 10.13 | 11.76 | Inc-C4orf34 NONCODE c Inc-C4orf34 NONHSAT0 chr4    | 39872792  | 39874400  | - |
| TC0400001811.oe.1 | -2.57  | -1.36 | 2.57  | down | 10.30 | 11.67 | Inc-C4orf34 LNCipedia lc Inc-C4orf34 NONHSAT0 chr4 | 39910065  | 39913687  | - |
| TC0400001906.oe.1 | -2.46  | -1.30 | 2.46  | down | 6.42  | 7.72  | Inc-PDCL2-2 LNCipedia lc Inc-PDCL2-2 NONHSAT0 chr4 | 55427907  | 55431424  | - |
| TC0400001934.oe.1 | -2.08  | -1.06 | 2.08  | down | 3.11  | 4.17  | NONHSAG0 LNCipedia lc Inc-IGFBP7 NONHSAT0 chr4     | 59047020  | 59075256  | - |
| TC0400002005.oe.1 | 2.06   | 1.04  | 2.06  | up   | 7.29  | 6.25  | Inc-COX18 NONCODE c Inc-COX18 NONHSAT0 chr4        | 73100861  | 73104080  | - |
| TC0400002012.oe.1 | 5.32   | 2.41  | 5.32  | up   | 9.22  | 6.81  | Inc-CXCL5-1 LNCipedia lc Inc-CXCL5-1 NONHSAT0 chr4 | 73995642  | 73996738  | - |
| TC0400002120.oe.1 | -2.26  | -1.17 | 2.26  | down | 3.25  | 4.42  | Inc-NKX6-1 LNCipedia lc Inc-NKX6-1 --- chr4        | 84746003  | 84749139  | - |
| TC0400002126.oe.1 | 2.16   | 1.11  | 2.16  | up   | 6.45  | 5.34  | Inc-SLC10A6 NONCODE c Inc-SLC10A6 NONHSAT0 chr4    | 86095135  | 86101922  | - |
| TC0400002141.oe.1 | -2.10  | -1.07 | 2.10  | down | 3.45  | 4.52  | Inc-HSD17B LNCipedia lc Inc-HSD17B NONHSAT0 chr4   | 87495008  | 87529209  | - |
| TC0400002204.oe.1 | -15.97 | -4.00 | 15.97 | down | 7.98  | 11.98 | Inc-ADH1B LNCipedia lc Inc-ADH1B NONHSAT0 chr4     | 99344888  | 99352744  | - |
| TC0400002230.oe.1 | 2.06   | 1.04  | 2.06  | up   | 7.41  | 6.37  | Inc-UBE2D3 LNCipedia lc Inc-UBE2D3 NONHSAT0 chr4   | 102727274 | 102730721 | - |
| TC0400002291.oe.1 | 2.04   | 1.03  | 2.04  | up   | 8.39  | 7.36  | Inc-CASP6-2 LNCipedia lc Inc-CASP6-2 NONHSAT0 chr4 | 109717548 | 109718761 | - |
| TC0400002309.oe.1 | -2.04  | -1.03 | 2.04  | down | 3.90  | 4.92  | RP11-269F2 NONCODE c Inc-TIFA-2:1 NONHSAT0 chr4    | 111826881 | 112072698 | - |

|                   |       |       |      |      |       |       |                            |                       |      |           |           |   |
|-------------------|-------|-------|------|------|-------|-------|----------------------------|-----------------------|------|-----------|-----------|---|
| TC0400002344.oe.1 | 2.65  | 1.40  | 2.65 | up   | 8.52  | 7.12  | Inc-PRSS12- NONCODE        | Inc-PRSS12- NONHSAT0  | chr4 | 118738104 | 118739223 | - |
| TC0400002494.oe.1 | -2.48 | -1.31 | 2.48 | down | 3.00  | 4.31  | Inc-GYPE-1 NONCODE         | Inc-GYPE-1: NONHSAT0  | chr4 | 143817789 | 143829352 | - |
| TC0400002509.oe.1 | -2.77 | -1.47 | 2.77 | down | 10.92 | 12.39 | Inc-OTUD4- LNCipedia       | Inc-OTUD4- ---        | chr4 | 145399817 | 145400043 | - |
| TC0400002520.oe.1 | 2.16  | 1.11  | 2.16 | up   | 8.71  | 7.60  | Inc-SLC10A7 LNCipedia      | Inc-SLC10A7 NONHSAT0  | chr4 | 145870301 | 145892415 | - |
| TC0400002521.oe.1 | 2.23  | 1.16  | 2.23 | up   | 5.63  | 4.48  | Inc-SLC10A7 NONCODE        | Inc-SLC10A7 NONHSAT0  | chr4 | 145876496 | 145885748 | - |
| TC0400002586.oe.1 | -2.25 | -1.17 | 2.25 | down | 7.80  | 8.97  | Inc-FGA-1 LNCipedia        | Inc-FGA-1:1 NONHSAT0  | chr4 | 154608508 | 154609691 | - |
| TC0400002616.oe.1 | 2.41  | 1.27  | 2.41 | up   | 7.43  | 6.16  | Inc-C4orf46 LNCipedia      | Inc-C4orf46: NONHSAT0 | chr4 | 158130800 | 158173023 | - |
| TC0400002645.oe.1 | 2.37  | 1.25  | 2.37 | up   | 5.11  | 3.86  | Inc-TMEM19 LNCipedia       | Inc-TMEM19 ---        | chr4 | 165070608 | 165071004 | - |
| TC0400002654.oe.1 | -2.20 | -1.14 | 2.20 | down | 5.74  | 6.88  | Inc-DDX60- NONCODE         | Inc-DDX60- NONHSAT0   | chr4 | 167922865 | 167925989 | - |
| TC0400002656.oe.1 | 2.10  | 1.07  | 2.10 | up   | 5.55  | 4.48  | Inc-DDX60L LNCipedia       | Inc-DDX60L NONHSAT0   | chr4 | 168236029 | 168237488 | - |
| TC04000083.hg.4   | 2.01  | 1.01  | 2.01 | up   | 7.39  | 6.38  | AFAP1-AS1 AFAP1 antisense  | ---                   | chr4 | 7754090   | 7778927   | + |
| TC04001655.hg.4   | 2.16  | 1.11  | 2.16 | up   | 9.72  | 8.61  | ANXA2P1 annexin A2 protein | ---                   | chr4 | 153307469 | 153308811 | - |
| TC0500000022.oe.1 | -3.56 | -1.83 | 3.56 | down | 8.05  | 9.88  | Inc-EXOC3- LNCipedia       | Inc-EXOC3- NONHSAT0   | chr5 | 649317    | 651579    | + |
| TC0500000221.oe.1 | 2.41  | 1.27  | 2.41 | up   | 11.03 | 9.76  | Inc-FBXL7-5 LNCipedia      | Inc-FBXL7-5 NONHSAT1  | chr5 | 15451996  | 15452553  | + |
| TC0500000407.oe.1 | -2.21 | -1.14 | 2.21 | down | 5.57  | 6.72  | Inc-ZNF131 NONCODE         | Inc-ZNF131 NONHSAT1   | chr5 | 43054729  | 43055305  | + |
| TC0500000453.oe.1 | -2.57 | -1.36 | 2.57 | down | 3.78  | 5.14  | Inc-ITGA1-4 LNCipedia      | Inc-ITGA1-4 NONHSAT1  | chr5 | 52931152  | 52959207  | + |
| TC0500000561.oe.1 | -3.28 | -1.71 | 3.28 | down | 9.10  | 10.81 | Inc-SREK1-8 LNCipedia      | Inc-SREK1-8 NONHSAT1  | chr5 | 66022872  | 66024373  | + |
| TC0500000562.oe.1 | -2.05 | -1.04 | 2.05 | down | 7.43  | 8.47  | Inc-SREK1-7 LNCipedia      | Inc-SREK1-7 NONHSAT1  | chr5 | 66025306  | 66025977  | + |
| TC0500000574.oe.1 | 2.00  | 1.00  | 2.00 | up   | 5.67  | 4.67  | Inc-SREK1-1 NONCODE        | Inc-SREK1-1 NONHSAT1  | chr5 | 67142164  | 67143020  | + |
| TC0500000644.oe.1 | -2.60 | -1.38 | 2.60 | down | 4.46  | 5.84  | Inc-FCHO2- LNCipedia       | Inc-FCHO2- NONHSAT1   | chr5 | 72869728  | 72872332  | + |
| TC0500000684.oe.1 | -3.00 | -1.59 | 3.00 | down | 5.30  | 6.89  | Inc-ANKDD1 LNCipedia       | Inc-ANKDD1 NONHSAT1   | chr5 | 75597114  | 75598040  | + |
| TC0500000727.oe.1 | 2.22  | 1.15  | 2.22 | up   | 7.99  | 6.84  | Inc-BHMT-1 LNCipedia       | Inc-BHMT-1 NONHSAT1   | chr5 | 79082392  | 79083198  | + |
| TC0500000761.oe.1 | -2.23 | -1.16 | 2.23 | down | 2.86  | 4.01  | Inc-ZCCHC9 LNCipedia       | Inc-ZCCHC9 NONHSAT1   | chr5 | 81318174  | 81319269  | + |
| TC0500000906.oe.1 | -3.93 | -1.97 | 3.93 | down | 5.25  | 7.22  | Inc-CTD-22 NONCODE         | Inc-CTD-22 NONHSAT1   | chr5 | 97035882  | 97037510  | + |
| TC0500000941.oe.1 | -2.75 | -1.46 | 2.75 | down | 7.45  | 8.91  | Inc-C5orf30 LNCipedia      | Inc-C5orf30 NONHSAT1  | chr5 | 103173254 | 103174191 | + |
| TC0500000942.oe.1 | -2.32 | -1.21 | 2.32 | down | 3.77  | 4.99  | Inc-C5orf30 NONCODE        | Inc-C5orf30 NONHSAT1  | chr5 | 103184243 | 103191058 | + |
| TC0500000962.oe.1 | -2.03 | -1.02 | 2.03 | down | 5.70  | 6.73  | Inc-MAN2A NONCODE          | Inc-MAN2A NONHSAT1    | chr5 | 108748399 | 108832820 | + |
| TC0500001054.oe.1 | -2.08 | -1.06 | 2.08 | down | 4.72  | 5.78  | Inc-TNFAIP8 LNCipedia      | Inc-TNFAIP8 NONHSAT1  | chr5 | 119197758 | 119206892 | + |
| TC0500001070.oe.1 | -2.16 | -1.11 | 2.16 | down | 7.85  | 8.96  | Inc-SNX24-1 LNCipedia      | Inc-SNX24-1 NONHSAT1  | chr5 | 122803494 | 122808711 | + |
| TC0500001127.oe.1 | -2.96 | -1.57 | 2.96 | down | 9.21  | 10.78 | Inc-SLC27A6 LNCipedia      | Inc-SLC27A6 NONHSAT1  | chr5 | 128186798 | 128187086 | + |
| TC0500001138.oe.1 | -2.06 | -1.04 | 2.06 | down | 5.88  | 6.93  | Inc-LYRM7-1 LNCipedia      | Inc-LYRM7-1 NONHSAT1  | chr5 | 131204459 | 131205427 | + |
| TC0500001207.oe.1 | 2.92  | 1.54  | 2.92 | up   | 4.92  | 3.37  | Inc-CATSPEF LNCipedia      | Inc-CATSPEF NONHSAT1  | chr5 | 135265437 | 135267895 | + |
| TC0500001263.oe.1 | -2.79 | -1.48 | 2.79 | down | 3.86  | 5.34  | Inc-PAIP2-2 LNCipedia      | Inc-PAIP2-2 ---       | chr5 | 139309812 | 139310433 | + |
| TC0500001278.oe.1 | -3.26 | -1.71 | 3.26 | down | 4.53  | 6.23  | Inc-PURA-2 NONCODE         | Inc-PURA-2: NONHSAT1  | chr5 | 140117258 | 140122167 | + |
| TC0500001282.oe.1 | -2.51 | -1.33 | 2.51 | down | 3.50  | 4.83  | Inc-IGIP-2// NONCODE       | Inc-IGIP-2:1 NONHSAT1 | chr5 | 140200163 | 140203187 | + |
| TC0500001365.oe.1 | -2.60 | -1.38 | 2.60 | down | 4.37  | 5.76  | Inc-POU4F3 LNCipedia       | Inc-POU4F3 ---        | chr5 | 146463010 | 146463380 | + |
| TC0500001390.oe.1 | 2.72  | 1.45  | 2.72 | up   | 6.79  | 5.34  | Inc-AFAP1L1 LNCipedia      | Inc-AFAP1L1 NONHSAT1  | chr5 | 149183549 | 149200620 | + |
| TC0500001392.oe.1 | 2.19  | 1.13  | 2.19 | up   | 6.69  | 5.56  | Inc-AFAP1L1 LNCipedia      | Inc-AFAP1L1 NONHSAT1  | chr5 | 149252344 | 149258574 | + |
| TC0500001420.oe.1 | 2.07  | 1.05  | 2.07 | up   | 6.43  | 5.38  | Inc-IRGM-3 LNCipedia       | Inc-IRGM-3: NONHSAT1  | chr5 | 151020592 | 151027490 | + |
| TC0500001504.oe.1 | -2.73 | -1.45 | 2.73 | down | 2.85  | 4.30  | Inc-PTTG1-5 NONCODE        | Inc-PTTG1-5 NONHSAT1  | chr5 | 160447681 | 160448341 | + |
| TC0500001778.oe.1 | 2.28  | 1.19  | 2.28 | up   | 8.43  | 7.24  | Inc-ZDHHC1 LNCipedia       | Inc-ZDHHC1 NONHSAT0   | chr5 | 767397    | 768931    | - |
| TC0500001827.oe.1 | 2.06  | 1.04  | 2.06 | up   | 4.62  | 3.58  | Inc-MED10- NONCODE         | Inc-MED10- NONHSAT1   | chr5 | 5395972   | 5396335   | - |
| TC0500002075.oe.1 | -2.29 | -1.20 | 2.29 | down | 3.29  | 4.48  | Inc-PRLR-1 LNCipedia       | Inc-PRLR-1: NONHSAT1  | chr5 | 35318218  | 35318651  | - |
| TC0500002096.oe.1 | -2.46 | -1.30 | 2.46 | down | 3.38  | 4.68  | Inc-NUP155 LNCipedia       | Inc-NUP155 NONHSAT1   | chr5 | 37169532  | 37176099  | - |
| TC0500002097.oe.1 | -2.03 | -1.02 | 2.03 | down | 3.58  | 4.60  | Inc-NUP155 LNCipedia       | Inc-NUP155 NONHSAT1   | chr5 | 37246175  | 37246479  | - |
| TC0500002113.oe.1 | 2.42  | 1.28  | 2.42 | up   | 7.54  | 6.26  | Inc-AC09143 NONCODE        | Inc-AC09143 NONHSAT1  | chr5 | 38485597  | 38489245  | - |
| TC0500002122.oe.1 | -2.17 | -1.12 | 2.17 | down | 7.60  | 8.72  | Inc-FYB-3 NONCODE          | Inc-FYB-3:1 NONHSAT1  | chr5 | 38962951  | 38971961  | - |
| TC0500002123.oe.1 | 2.07  | 1.05  | 2.07 | up   | 6.56  | 5.51  | Inc-FYB-1 NONCODE          | Inc-FYB-1:1 NONHSAT1  | chr5 | 39105224  | 39105755  | - |
| TC0500002128.oe.1 | 2.04  | 1.03  | 2.04 | up   | 8.59  | 7.56  | Inc-FYB-2 LNCipedia        | Inc-FYB-2:1 NONHSAT1  | chr5 | 39374745  | 39376042  | - |

|                   |       |       |       |      |       |       |                            |                                |           |             |
|-------------------|-------|-------|-------|------|-------|-------|----------------------------|--------------------------------|-----------|-------------|
| TC0500002178.oe.1 | -2.40 | -1.26 | 2.40  | down | 3.09  | 4.36  | Inc-EMB-6 LNCipedia        | lc Inc-EMB-6:1 NONHSAT1( chr5  | 50403256  | 50443248 -  |
| TC0500002204.oe.1 | 2.94  | 1.56  | 2.94  | up   | 7.56  | 6.00  | Inc-RP11-45 uncharacteri   | Inc-RP11-45 NONHSAT1( chr5     | 54660158  | 54744258 -  |
| TC0500002219.oe.1 | -2.24 | -1.16 | 2.24  | down | 10.01 | 11.17 | Inc-ANKRD5 LNCipedia       | lc Inc-ANKRD5 NONHSAT1( chr5   | 55936653  | 55939493 -  |
| TC0500002221.oe.1 | -2.03 | -1.02 | 2.03  | down | 11.03 | 12.05 | Inc-ANKRD5 LNCipedia       | lc Inc-ANKRD5 NONHSAT1( chr5   | 55955980  | 55960480 -  |
| TC0500002229.oe.1 | -2.07 | -1.05 | 2.07  | down | 10.49 | 11.54 | Inc-CTC-23( LNCipedia      | lc Inc-CTC-23( --- chr5        | 56488360  | 56493753 -  |
| TC0500002244.oe.1 | 4.04  | 2.02  | 4.04  | up   | 10.89 | 8.87  | Inc-CTD-21: NONCODE        | cl Inc-CTD-21: NONHSAT1( chr5  | 58453985  | 58460086 -  |
| TC0500002245.oe.1 | 5.46  | 2.45  | 5.46  | up   | 13.01 | 10.56 | Inc-CTD-21: NONCODE        | cl Inc-CTD-21: NONHSAT1( chr5  | 58454706  | 58455116 -  |
| TC0500002336.oe.1 | -3.31 | -1.73 | 3.31  | down | 4.28  | 6.01  | Inc-TAF9-9 LNCipedia       | lc Inc-TAF9-9: NONHSAT1( chr5  | 70132532  | 70134832 -  |
| TC0500002377.oe.1 | 2.24  | 1.16  | 2.24  | up   | 6.43  | 5.26  | Inc-ZNF366 LNCipedia       | lc Inc-ZNF366: NONHSAT1( chr5  | 73552531  | 73554430 -  |
| TC0500002553.oe.1 | -2.58 | -1.37 | 2.58  | down | 6.88  | 8.25  | Inc-AC0273: NONCODE        | cl Inc-AC0273: NONHSAT1( chr5  | 91370798  | 91373845 -  |
| TC0500002575.oe.1 | -3.33 | -1.74 | 3.33  | down | 5.61  | 7.34  | Inc-SPATA9 LNCipedia       | lc Inc-SPATA9: NONHSAT1( chr5  | 95503850  | 95513000 -  |
| TC0500002576.oe.1 | -2.12 | -1.08 | 2.12  | down | 6.83  | 7.92  | Inc-SPATA9 LNCipedia       | lc Inc-SPATA9: NONHSAT1( chr5  | 95513132  | 95516768 -  |
| TC0500002577.oe.1 | -2.32 | -1.22 | 2.32  | down | 6.28  | 7.50  | Inc-SPATA9 NONCODE         | cl Inc-SPATA9: NONHSAT1( chr5  | 95528013  | 95537107 -  |
| TC0500002578.oe.1 | -3.65 | -1.87 | 3.65  | down | 8.16  | 10.02 | Inc-SPATA9 LNCipedia       | lc Inc-SPATA9: NONHSAT1( chr5  | 95546974  | 95550757 -  |
| TC0500002608.oe.1 | -2.22 | -1.15 | 2.22  | down | 7.21  | 8.36  | Inc-RIOK2-6 LNCipedia      | lc Inc-RIOK2-6 NONHSAT1( chr5  | 98856425  | 98858664 -  |
| TC0500002610.oe.1 | -2.64 | -1.40 | 2.64  | down | 7.39  | 8.79  | Inc-RIOK2-8 NONCODE        | cl Inc-RIOK2-8 NONHSAT1( chr5  | 98881247  | 98888186 -  |
| TC0500002611.oe.1 | -2.50 | -1.32 | 2.50  | down | 5.33  | 6.65  | Inc-RIOK2-9 LNCipedia      | lc Inc-RIOK2-9 --- chr5        | 98896941  | 98897293 -  |
| TC0500002613.oe.1 | -3.01 | -1.59 | 3.01  | down | 7.45  | 9.04  | Inc-RIOK2-1 LNCipedia      | lc Inc-RIOK2-1 NONHSAT1( chr5  | 98901151  | 98926517 -  |
| TC0500002705.oe.1 | -2.25 | -1.17 | 2.25  | down | 5.83  | 7.00  | Inc-PGGT1B NONCODE         | cl Inc-PGGT1B NONHSAT1( chr5   | 115275339 | 115296623 - |
| TC0500002861.oe.1 | -2.41 | -1.27 | 2.41  | down | 3.27  | 4.54  | Inc-FSTL4-4 NONCODE        | cl Inc-FSTL4-4 NONHSAT1( chr5  | 133720495 | 133720934 - |
| TC0500002877.oe.1 | 2.68  | 1.42  | 2.68  | up   | 8.28  | 6.86  | Inc-CTC-34( LNCipedia      | lc Inc-CTC-34( NONHSAT1( chr5  | 135029287 | 135032010 - |
| TC0500003031.oe.1 | 36.21 | 5.18  | 36.21 | up   | 8.90  | 3.72  | Inc-JAKMIP2 NONCODE        | cl Inc-JAKMIP2 NONHSAT1( chr5  | 147824572 | 147828130 - |
| TC0500003141.oe.1 | -2.26 | -1.17 | 2.26  | down | 3.99  | 5.16  | Inc-CLINT1 NONCODE         | cl Inc-CLINT1 NONHSAT1( chr5   | 157945315 | 157951960 - |
| TC0500003297.oe.1 | 2.15  | 1.10  | 2.15  | up   | 8.42  | 7.31  | Inc-HK3-3 NONCODE          | cl Inc-HK3-3:1 NONHSAT1( chr5  | 176975416 | 176980276 - |
| TC05000111.hg.4   | 2.21  | 1.14  | 2.21  | up   | 3.61  | 2.46  | PMCHL1 pro-melanin ---     | --- chr5                       | 22142352  | 22152555 +  |
| TC05000127.hg.4   | -2.36 | -1.24 | 2.36  | down | 3.58  | 4.82  | LSP1P3 lymphocyte ---      | --- chr5                       | 28926870  | 28927313 +  |
| TC05000462.hg.4   | -2.44 | -1.28 | 2.44  | down | 3.43  | 4.72  | C5orf27 chromosome ---     | --- chr5                       | 95852232  | 95860133 +  |
| TC05001554.hg.4   | 2.09  | 1.06  | 2.09  | up   | 4.00  | 2.94  | SCARNA18 small Cajal b --- | --- chr5                       | 83064204  | 83064337 -  |
| TC0600000025.oe.1 | 3.10  | 1.63  | 3.10  | up   | 7.69  | 6.06  | Inc-AL0333( NONCODE        | cl Inc-AL0333( NONHSAT1( chr6  | 861046    | 863352 +    |
| TC0600000140.oe.1 | 2.08  | 1.06  | 2.08  | up   | 5.76  | 4.70  | Inc-BPHL-1 LNCipedia       | lc Inc-BPHL-1: --- chr6        | 3156308   | 3157544 +   |
| TC0600000205.oe.1 | -2.09 | -1.07 | 2.09  | down | 2.96  | 4.02  | Inc-C6orf20: NONCODE       | cl Inc-C6orf20: NONHSAT1( chr6 | 4312514   | 4328826 +   |
| TC0600000261.oe.1 | 2.02  | 1.01  | 2.02  | up   | 8.08  | 7.06  | Inc-DSP-2 NONCODE          | cl Inc-DSP-2:1 NONHSAT1( chr6  | 7506203   | 7506549 +   |
| TC0600000379.oe.1 | 2.34  | 1.23  | 2.34  | up   | 13.73 | 12.50 | Inc-SOX4-2 LNCipedia       | lc Inc-SOX4-2: NONHSAT1( chr6  | 21597430  | 21598619 +  |
| TC0600000430.oe.1 | 2.25  | 1.17  | 2.25  | up   | 5.92  | 4.76  | Inc-HIST1H3 LNCipedia      | lc Inc-HIST1H3 --- chr6        | 26022061  | 26022589 +  |
| TC0600000537.oe.1 | 2.12  | 1.09  | 2.12  | up   | 5.26  | 4.18  | Inc-TRIM40 NONCODE         | cl Inc-TRIM40 NONHSAT1( chr6   | 30170313  | 30171097 +  |
| TC0600000691.oe.1 | -2.33 | -1.22 | 2.33  | down | 3.28  | 4.50  | OTTHUMG0( LNCipedia        | lc Inc-KCTD20 NONHSAT1( chr6   | 36386831  | 36393462 +  |
| TC0600000900.oe.1 | -2.70 | -1.43 | 2.70  | down | 4.78  | 6.21  | Inc-BAG2-8 LNCipedia       | lc Inc-BAG2-8: NONHSAT1( chr6  | 57160808  | 57168833 +  |
| TC0600001011.oe.1 | -2.34 | -1.23 | 2.34  | down | 2.72  | 3.95  | Inc-MYO6-8 LNCipedia       | lc Inc-MYO6-8 --- chr6         | 76579170  | 76650342 +  |
| TC0600001127.oe.1 | -2.23 | -1.16 | 2.23  | down | 6.05  | 7.21  | Inc-GJA10-1 LNCipedia      | lc Inc-GJA10-1 NONHSAT1( chr6  | 90672453  | 90688912 +  |
| TC0600001209.oe.1 | 2.96  | 1.56  | 2.96  | up   | 6.18  | 4.61  | Inc-AIM1-4 LNCipedia       | lc Inc-AIM1-4: NONHSAT1( chr6  | 106088354 | 106096167 + |
| TC0600001290.oe.1 | -2.29 | -1.19 | 2.29  | down | 2.83  | 4.03  | Inc-WISP3-2 NONCODE        | cl Inc-WISP3-2 NONHSAT1( chr6  | 111873664 | 111876523 + |
| TC0600001304.oe.1 | 2.06  | 1.04  | 2.06  | up   | 4.05  | 3.01  | Inc-MARCK( LNCipedia       | lc Inc-MARCK( --- chr6         | 113291211 | 113304369 + |
| TC0600001414.oe.1 | 2.07  | 1.05  | 2.07  | up   | 4.21  | 3.15  | Inc-L3MBTL( NONCODE        | cl Inc-L3MBTL( NONHSAT1( chr6  | 129490683 | 129502672 + |
| TC0600001488.oe.1 | 5.31  | 2.41  | 5.31  | up   | 11.34 | 8.93  | Inc-KIAA124 LNCipedia      | lc Inc-KIAA124 NONHSAT1( chr6  | 137874861 | 137875744 + |
| TC0600001524.oe.1 | 2.57  | 1.36  | 2.57  | up   | 4.48  | 3.12  | Inc-VTA1-3 NONCODE         | cl Inc-VTA1-3: NONHSAT1( chr6  | 142402778 | 142404246 + |
| TC0600001579.oe.1 | 2.15  | 1.11  | 2.15  | up   | 6.00  | 4.90  | Inc-SAMD5 LNCipedia        | lc Inc-SAMD5 --- chr6          | 147245336 | 147245815 + |
| TC0600001583.oe.1 | -2.01 | -1.01 | 2.01  | down | 8.49  | 9.49  | Inc-STXBP5 LNCipedia       | lc Inc-STXBP5 NONHSAT1( chr6   | 147565729 | 147566713 + |
| TC0600001593.oe.1 | -2.21 | -1.14 | 2.21  | down | 3.45  | 4.59  | Inc-SUMO4 LNCipedia        | lc Inc-SUMO4 NONHSAT1( chr6    | 149383833 | 149385871 + |
| TC0600001610.oe.1 | 2.59  | 1.37  | 2.59  | up   | 6.55  | 5.18  | Inc-PLEKHG( NONCODE        | cl Inc-PLEKHG( NONHSAT1( chr6  | 150934968 | 150935566 + |



|                   |       |       |      |      |       |       |                           |                                |           |           |   |
|-------------------|-------|-------|------|------|-------|-------|---------------------------|--------------------------------|-----------|-----------|---|
| TC0600001614.oe.1 | -2.08 | -1.06 | 2.08 | down | 3.91  | 4.97  | Inc-AKAP12- LNCipedia     | lc Inc-AKAP12- NONHSAT1: chr6  | 151391544 | 151404853 | + |
| TC0600001703.oe.1 | 2.02  | 1.01  | 2.02 | up   | 6.36  | 5.35  | Inc-SLC22A3- LNCipedia    | lc Inc-SLC22A3- NONHSAT1: chr6 | 160272617 | 160276130 | + |
| TC0600001704.oe.1 | -2.51 | -1.33 | 2.51 | down | 3.92  | 5.25  | Inc-SLC22A1 LNCipedia     | lc Inc-SLC22A1 NONHSAT1: chr6  | 160403634 | 160404866 | + |
| TC0600001723.oe.1 | -2.65 | -1.41 | 2.65 | down | 3.82  | 5.23  | Inc-PACRG- LNCipedia      | lc Inc-PACRG- --- chr6         | 163506573 | 163508155 | + |
| TC0600002185.oe.1 | -2.22 | -1.15 | 2.22 | down | 13.97 | 15.13 | Inc-FAM65B LNCipedia      | lc Inc-FAM65B --- chr6         | 25161606  | 25165052  | - |
| TC0600002275.oe.1 | -2.14 | -1.10 | 2.14 | down | 3.71  | 4.81  | Inc-ZFP57-1 LNCipedia     | lc Inc-ZFP57-1 --- chr6        | 29751965  | 29752207  | - |
| TC0600002286.oe.1 | 2.16  | 1.11  | 2.16 | up   | 7.31  | 6.19  | Inc-TRIM31- NONCODE       | cl Inc-TRIM31- NONHSAT1: chr6  | 30102897  | 30108199  | - |
| TC0600002287.oe.1 | 4.48  | 2.16  | 4.48 | up   | 9.34  | 7.18  | Inc-RNF39- LNCipedia      | lc Inc-RNF39- LNONHSAT1: chr6  | 30111218  | 30112475  | - |
| TC0600002336.oe.1 | 2.11  | 1.08  | 2.11 | up   | 6.83  | 5.75  | Inc-C6orf47- LNCipedia    | lc Inc-C6orf47- NONHSAT1: chr6 | 31644494  | 31645185  | - |
| TC0600002352.oe.1 | 2.02  | 1.01  | 2.02 | up   | 7.21  | 6.20  | Inc-DOM3Z- LNCipedia      | lc Inc-DOM3Z- NONHSAT1: chr6   | 31952227  | 31959038  | - |
| TC0600002512.oe.1 | 2.19  | 1.13  | 2.19 | up   | 11.12 | 9.99  | Inc-YIPF3-3 NONCODE       | cl Inc-YIPF3-3: NONHSAT1: chr6 | 43547686  | 43548470  | - |
| TC0600002543.oe.1 | 2.54  | 1.35  | 2.54 | up   | 4.62  | 3.27  | Inc-GPR110- LNCipedia     | lc Inc-GPR110- --- chr6        | 46866255  | 46869117  | - |
| TC0600002546.oe.1 | 2.03  | 1.02  | 2.03 | up   | 5.82  | 4.80  | Inc-GPR116- NONCODE       | cl Inc-GPR116- NONHSAT1: chr6  | 47016617  | 47042270  | - |
| TC0600002585.oe.1 | -2.04 | -1.03 | 2.04 | down | 12.76 | 13.79 | Inc-GCLC-2 LNCipedia      | lc Inc-GCLC-2: --- chr6        | 53490296  | 53490693  | - |
| TC0600002840.oe.1 | -2.35 | -1.23 | 2.35 | down | 2.94  | 4.17  | Inc-ASCC3- LNCipedia      | lc Inc-ASCC3- LNONHSAT1: chr6  | 101452964 | 101454237 | - |
| TC0600002850.oe.1 | -2.09 | -1.07 | 2.09 | down | 3.37  | 4.44  | RP11-809N1 LNCipedia      | lc Inc-BVES-2: --- chr6        | 104831129 | 104845820 | - |
| TC0600002903.oe.1 | 2.03  | 1.02  | 2.03 | up   | 8.93  | 7.91  | Inc-SLC22A1 LNCipedia     | lc Inc-SLC22A1 NONHSAT1: chr6  | 110706362 | 110706882 | - |
| TC0600002984.oe.1 | -2.24 | -1.16 | 2.24 | down | 3.35  | 4.51  | Inc-C6orf17 LNCipedia     | lc Inc-C6orf17: --- chr6       | 120344730 | 120356967 | - |
| TC0600003077.oe.1 | -2.39 | -1.26 | 2.39 | down | 3.97  | 5.23  | Inc-ALDH8A LNCipedia      | lc Inc-ALDH8A NONHSAT1: chr6   | 135032228 | 135033747 | - |
| TC0600003090.oe.1 | -2.00 | -1.00 | 2.00 | down | 5.86  | 6.86  | Inc-FAM54A NONCODE        | cl Inc-FAM54A NONHSAT1: chr6   | 136260746 | 136273550 | - |
| TC0600003115.oe.1 | -2.15 | -1.10 | 2.15 | down | 3.26  | 4.37  | Inc-PERP-5 LNCipedia      | lc Inc-PERP-5: --- chr6        | 137908360 | 137908573 | - |
| TC0600003140.oe.1 | -2.14 | -1.10 | 2.14 | down | 3.34  | 4.44  | Inc-NMBR- LNCipedia       | lc Inc-NMBR- LNONHSAT1: chr6   | 142058330 | 142075922 | - |
| TC0600003146.oe.1 | 2.01  | 1.01  | 2.01 | up   | 8.63  | 7.62  | Inc-ADAT2- LNONCODE       | cl Inc-ADAT2- NONHSAT1: chr6   | 142779543 | 142837047 | - |
| TC0600003256.oe.1 | -2.73 | -1.45 | 2.73 | down | 4.07  | 5.52  | Inc-SERAC1- NONCODE       | cl Inc-SERAC1- NONHSAT1: chr6  | 157310590 | 157312707 | - |
| TC0600003285.oe.1 | -2.05 | -1.04 | 2.05 | down | 2.84  | 3.88  | Inc-SOD2-7 LNCipedia      | lc Inc-SOD2-7 --- chr6         | 159559297 | 159560091 | - |
| TC0600003289.oe.1 | 2.16  | 1.11  | 2.16 | up   | 11.88 | 10.76 | Inc-TCP1-5 LNCipedia      | lc Inc-TCP1-5: NONHSAT1: chr6  | 159682610 | 159692650 | - |
| TC0600003306.oe.1 | -2.65 | -1.41 | 2.65 | down | 3.24  | 4.65  | Inc-LPA-2 LNCipedia       | lc Inc-LPA-2:1 NONHSAT1: chr6  | 160815550 | 160817351 | - |
| TC0600003340.oe.1 | 2.01  | 1.00  | 2.01 | up   | 4.14  | 3.13  | Inc-C6orf11 LNCipedia     | lc Inc-C6orf11: NONHSAT1: chr6 | 165327486 | 165328978 | - |
| TC0600003425.oe.1 | 2.20  | 1.14  | 2.20 | up   | 6.29  | 5.15  | Inc-PSMB1- LNCipedia      | lc Inc-PSMB1- NONHSAT1: chr6   | 170575594 | 170576937 | - |
| TC06002076.hg.4   | -2.09 | -1.07 | 2.09 | down | 3.21  | 4.28  | STL//RP11-5 novel transcr | --- --- chr6                   | 124908246 | 124963039 | - |
| TC06002292.hg.4   | -2.39 | -1.26 | 2.39 | down | 3.76  | 5.02  | CAHM colon adeno          | --- --- chr6                   | 163413065 | 163413950 | - |
| TC06004094.hg.4   | -2.06 | -1.04 | 2.06 | down | 2.62  | 3.66  | C6orf164 chromosome       | --- --- chr6                   | 87382002  | 87399749  | + |
| TC0700000182.oe.1 | -2.10 | -1.07 | 2.10 | down | 3.30  | 4.37  | Inc-AHR-5 NONCODE         | cl Inc-AHR-5:1 NONHSAT1: chr7  | 17080598  | 17082573  | + |
| TC0700000183.oe.1 | -2.26 | -1.17 | 2.26 | down | 13.83 | 15.00 | Inc-TSPAN1 LNCipedia      | lc Inc-TSPAN1: NONHSAT1: chr7  | 17329858  | 17333950  | + |
| TC0700000214.oe.1 | 2.06  | 1.04  | 2.06 | up   | 6.03  | 4.99  | Inc-ABCB5- LNCipedia      | lc Inc-ABCB5- LNONHSAT1: chr7  | 20588990  | 20590085  | + |
| TC0700000260.oe.1 | -2.53 | -1.34 | 2.53 | down | 3.51  | 4.85  | Inc-NPY-2 LNCipedia       | lc Inc-NPY-2:1 --- chr7        | 24654726  | 24654954  | + |
| TC0700000282.oe.1 | 2.28  | 1.19  | 2.28 | up   | 7.11  | 5.92  | Inc-C7orf71- NONCODE      | cl Inc-C7orf71- NONHSAT1: chr7 | 26667384  | 26668467  | + |
| TC0700000302.oe.1 | -2.29 | -1.20 | 2.29 | down | 7.34  | 8.54  | Inc-EVX1-2 LNONCODE       | cl Inc-EVX1-2: NONHSAT1: chr7  | 27769678  | 27772539  | + |
| TC0700000395.oe.1 | -2.33 | -1.22 | 2.33 | down | 14.51 | 15.73 | Inc-EEP1- LNONCODE        | cl Inc-EEP1- LNONHSAT1: chr7   | 36403493  | 36417148  | + |
| TC0700000454.oe.1 | 2.00  | 1.00  | 2.00 | up   | 6.25  | 5.25  | Inc-STK17A- NONCODE       | cl Inc-STK17A- NONHSAT1: chr7  | 43479608  | 43484615  | + |
| TC0700000473.oe.1 | 2.30  | 1.20  | 2.30 | up   | 5.45  | 4.24  | Inc-PPIA-5 NONCODE        | cl Inc-PPIA-5:1 NONHSAT1: chr7 | 44756188  | 44756992  | + |
| TC0700000557.oe.1 | 2.06  | 1.04  | 2.06 | up   | 9.38  | 8.34  | Inc-EGFR-2 LNCipedia      | lc Inc-EGFR-2: NONHSAT1: chr7  | 55428056  | 55431406  | + |
| TC0700000649.oe.1 | 2.27  | 1.18  | 2.27 | up   | 5.43  | 4.25  | Inc-ZNF138- LNCipedia     | lc Inc-ZNF138- NONHSAT1: chr7  | 64681133  | 64686885  | + |
| TC0700000693.oe.1 | 2.22  | 1.15  | 2.22 | up   | 6.31  | 5.15  | Inc-TYW1-1 LNCipedia      | lc Inc-TYW1-1 NONHSAT1: chr7   | 66995173  | 66998855  | + |
| TC0700000819.oe.1 | -2.55 | -1.35 | 2.55 | down | 7.76  | 9.11  | Inc-RSBN1L- LNCipedia     | lc Inc-RSBN1L- NONHSAT1: chr7  | 77940199  | 77954894  | + |
| TC0700000833.oe.1 | -2.13 | -1.09 | 2.13 | down | 5.34  | 6.43  | Inc-CD36-3 LNCipedia      | lc Inc-CD36-3: NONHSAT1: chr7  | 80218678  | 80219288  | + |
| TC0700000936.oe.1 | -2.47 | -1.30 | 2.47 | down | 6.64  | 7.94  | Inc-DYNC1L- NONCODE       | cl Inc-DYNC1L: NONHSAT1: chr7  | 96117188  | 96121442  | + |
| TC0700001023.oe.1 | 2.62  | 1.39  | 2.62 | up   | 9.89  | 8.51  | Inc-TRIP6-3 NONCODE       | cl Inc-TRIP6-3: NONHSAT1: chr7 | 100887002 | 100887496 | + |
| TC0700001033.oe.1 | 3.69  | 1.88  | 3.69 | up   | 11.50 | 9.62  | Inc-AP1S1-1 LNCipedia     | lc Inc-AP1S1-1 NONHSAT1: chr7  | 101127105 | 101128534 | + |

|                   |       |       |      |      |       |       |                              |                             |           |           |   |
|-------------------|-------|-------|------|------|-------|-------|------------------------------|-----------------------------|-----------|-----------|---|
| TC0700001098.oe.1 | -2.64 | -1.40 | 2.64 | down | 2.34  | 3.74  | Inc-GPR22-1 NONCODE c        | Inc-GPR22-1 NONHSAT1: chr7  | 107470018 | 107471549 | + |
| TC0700001149.oe.1 | -2.03 | -1.02 | 2.03 | down | 7.83  | 8.85  | Inc-CAPZA2 LNCipedia lc      | Inc-CAPZA2 NONHSAT1: chr7   | 116736098 | 116736353 | + |
| TC0700001228.oe.1 | 2.00  | 1.00  | 2.00 | up   | 8.38  | 7.38  | Inc-FSCN3-2 LNCipedia lc     | Inc-FSCN3-2 NONHSAT1: chr7  | 127652181 | 127652422 | + |
| TC0700001294.oe.1 | -3.71 | -1.89 | 3.71 | down | 3.74  | 5.63  | Inc-MEST-6 LNCipedia lc      | Inc-MEST-6 NONHSAT1: chr7   | 131339965 | 131344277 | + |
| TC0700001513.oe.1 | -2.02 | -1.01 | 2.02 | down | 3.44  | 4.45  | Inc-GIMAP2 LNCipedia lc      | Inc-GIMAP2 NONHSAT1: chr7   | 150685697 | 150687518 | + |
| TC0700001553.oe.1 | 2.14  | 1.10  | 2.14 | up   | 9.33  | 8.23  | Inc-GALNT1 NONCODE l         | Inc-GALNT1 NONHSAT1: chr7   | 152783193 | 152816522 | + |
| TC0700001668.oe.1 | 2.19  | 1.13  | 2.19 | up   | 10.44 | 9.31  | Inc-C7orf50 LNCipedia lc     | Inc-C7orf50 NONHSAT1: chr7  | 1152908   | 1155677   | - |
| TC0700001683.oe.1 | 2.81  | 1.49  | 2.81 | up   | 7.21  | 5.71  | Inc-AC0743f NONCODE c        | Inc-AC0743f NONHSAT1: chr7  | 1738630   | 1742310   | - |
| TC0700001774.oe.1 | -2.54 | -1.34 | 2.54 | down | 7.10  | 8.45  | Inc-THSD7A LNCipedia lc      | Inc-THSD7A NONHSAT1: chr7   | 11370435  | 11371320  | - |
| TC0700001926.oe.1 | -2.39 | -1.26 | 2.39 | down | 4.41  | 5.67  | Inc-HOXA13 LNCipedia lc      | Inc-HOXA13 NONHSAT1: chr7   | 27193503  | 27195600  | - |
| TC0700001928.oe.1 | -3.47 | -1.80 | 3.47 | down | 7.08  | 8.88  | Inc-HOXA11 LNCipedia lc      | Inc-HOXA11 NONHSAT1: chr7   | 27196880  | 27198353  | - |
| TC0700002081.oe.1 | 2.48  | 1.31  | 2.48 | up   | 8.53  | 7.22  | Inc-TMED4- NONCODE c         | Inc-TMED4- NONHSAT1: chr7   | 44565807  | 44567782  | - |
| TC0700002091.oe.1 | 2.01  | 1.01  | 2.01 | up   | 10.93 | 9.92  | Inc-NACAD- LNCipedia lc      | Inc-NACAD- NONHSAT1: chr7   | 45107751  | 45111697  | - |
| TC0700002096.oe.1 | -2.98 | -1.58 | 2.98 | down | 12.89 | 14.47 | Inc-AC0112f LNCipedia lc     | Inc-AC0112f NONHSAT1: chr7  | 45913773  | 45915325  | - |
| TC0700002126.oe.1 | 2.11  | 1.08  | 2.11 | up   | 8.83  | 7.76  | Inc-DDC-1 LNCipedia lc       | Inc-DDC-1:1 NONHSAT1: chr7  | 50595470  | 50607068  | - |
| TC0700002190.oe.1 | 4.21  | 2.07  | 4.21 | up   | 5.12  | 3.05  | Inc-ZNF680- LNCipedia lc     | Inc-ZNF680- NONHSAT1: chr7  | 62308860  | 62313387  | - |
| TC0700002331.oe.1 | 2.02  | 1.01  | 2.02 | up   | 10.08 | 9.07  | Inc-HIP1-4 LNCipedia lc      | Inc-HIP1-4:1 NONHSAT1: chr7 | 75423102  | 75424809  | - |
| TC0700002332.oe.1 | 2.07  | 1.05  | 2.07 | up   | 11.61 | 10.56 | Inc-HIP1-3/ LNCipedia lc     | Inc-HIP1-3:1 NONHSAT1: chr7 | 75425532  | 75437668  | - |
| TC0700002383.oe.1 | 2.36  | 1.24  | 2.36 | up   | 4.52  | 3.28  | Inc-CACNA2 LNCipedia lc      | Inc-CACNA2 NONHSAT1: chr7   | 81946444  | 81949661  | - |
| TC0700002435.oe.1 | -2.14 | -1.10 | 2.14 | down | 6.05  | 7.15  | Inc-ERVW-1 NONCODE c         | Inc-ERVW-1 NONHSAT1: chr7   | 92510865  | 92513967  | - |
| TC0700002445.oe.1 | 4.49  | 2.17  | 4.49 | up   | 6.41  | 4.25  | Inc-BET1-3 LNCipedia lc      | Inc-BET1-3:1 NONHSAT1: chr7 | 93886820  | 93890321  | - |
| TC0700002500.oe.1 | 2.22  | 1.15  | 2.22 | up   | 8.61  | 7.46  | Inc-MCM7-1 LNCipedia lc      | Inc-MCM7-1: NONHSAT1: chr7  | 100112120 | 100112896 | - |
| TC0700002555.oe.1 | 2.46  | 1.30  | 2.46 | up   | 10.11 | 8.82  | Inc-NAPEPLI NONCODE c        | Inc-NAPEPLI NONHSAT1: chr7  | 102926283 | 102933735 | - |
| TC0700002600.oe.1 | -2.18 | -1.12 | 2.18 | down | 2.90  | 4.02  | Inc-COG5-6 LNCipedia lc      | Inc-COG5-6 --- chr7         | 106973011 | 106973828 | - |
| TC0700002632.oe.1 | 3.23  | 1.69  | 3.23 | up   | 8.76  | 7.07  | Inc-IMMP2L LNCipedia lc      | Inc-IMMP2L NONHSAT1: chr7   | 111778327 | 111788920 | - |
| TC0700002633.oe.1 | 2.88  | 1.52  | 2.88 | up   | 7.29  | 5.76  | Inc-IMMP2L LNCipedia lc      | Inc-IMMP2L NONHSAT1: chr7   | 111869460 | 111872347 | - |
| TC0700002739.oe.1 | 2.36  | 1.24  | 2.36 | up   | 11.22 | 9.99  | Inc-PRRT4-1 NONCODE c        | Inc-PRRT4-1 NONHSAT1: chr7  | 128335547 | 128337204 | - |
| TC0700002781.oe.1 | 2.52  | 1.33  | 2.52 | up   | 8.74  | 7.41  | Inc-PLXNA4 NONCODE c         | Inc-PLXNA4 NONHSAT1: chr7   | 131509069 | 131510898 | - |
| TC0700002798.oe.1 | 3.58  | 1.84  | 3.58 | up   | 5.85  | 4.01  | Inc-AC0838f LNCipedia lc     | Inc-AC0838f --- chr7        | 135159883 | 135160161 | - |
| TC0700002799.oe.1 | 2.18  | 1.12  | 2.18 | up   | 6.55  | 5.42  | Inc-WDR91- LNCipedia lc      | Inc-WDR91- NONHSAT1: chr7   | 135166344 | 135168179 | - |
| TC0700002836.oe.1 | 3.29  | 1.72  | 3.29 | up   | 6.72  | 5.00  | Inc-JHDM1C NONCODE c         | Inc-JHDM1C NONHSAT1: chr7   | 140057407 | 140062551 | - |
| TC07000072.hg.4   | 2.63  | 1.40  | 2.63 | up   | 6.76  | 5.37  | PMS2CL PMS2 C-terr ---       | --- chr7                    | 6710126   | 6753862   | + |
| TC07000955.hg.4   | 2.49  | 1.32  | 2.49 | up   | 6.71  | 5.39  | OR2A9P//Of olfactory rec --- | --- chr7                    | 144294480 | 144300931 | + |
| TC07001275.hg.4   | -2.57 | -1.36 | 2.57 | down | 2.77  | 4.13  | DPY19L2P1 DPY19L2 pse ---    | --- chr7                    | 35079989  | 35186162  | - |
| TC07001735.hg.4   | 2.57  | 1.36  | 2.57 | up   | 5.29  | 3.92  | EFCAB10 EF-hand cal ---      | --- chr7                    | 105565120 | 105600875 | - |
| TC07003333.hg.4   | 2.13  | 1.09  | 2.13 | up   | 5.72  | 4.63  | NSUN5P1 NOP2/Sun d ---       | --- chr7                    | 75410341  | 75416786  | + |
| TC0800000101.oe.1 | 2.02  | 1.02  | 2.02 | up   | 6.31  | 5.30  | Inc-MTMR9- LNCipedia lc      | Inc-MTMR9- NONHSAT1: chr8   | 11256256  | 11256603  | + |
| TC0800000164.oe.1 | -3.03 | -1.60 | 3.03 | down | 6.95  | 8.56  | Inc-NAT1-5 LNCipedia lc      | Inc-NAT1-5: NONHSAT1: chr8  | 17960094  | 17964770  | + |
| TC0800000165.oe.1 | -3.14 | -1.65 | 3.14 | down | 6.68  | 8.33  | Inc-NAT1-4 LNCipedia lc      | Inc-NAT1-4: NONHSAT1: chr8  | 17972673  | 17986263  | + |
| TC0800000167.oe.1 | -2.17 | -1.11 | 2.17 | down | 5.51  | 6.63  | Inc-NAT1-2 NONCODE c         | Inc-NAT1-2: NONHSAT1: chr8  | 18006054  | 18009665  | + |
| TC0800000168.oe.1 | -3.12 | -1.64 | 3.12 | down | 5.32  | 6.97  | Inc-NAT1-1 NONCODE c         | Inc-NAT1-1: NONHSAT1: chr8  | 18013882  | 18025611  | + |
| TC0800000230.oe.1 | 2.82  | 1.49  | 2.82 | up   | 6.62  | 5.13  | Inc-TNFRSF1 LNCipedia lc     | Inc-TNFRSF1 NONHSAT1: chr8  | 23007839  | 23010641  | + |
| TC0800000341.oe.1 | 2.51  | 1.33  | 2.51 | up   | 9.73  | 8.41  | Inc-GS1-211 NONCODE c        | Inc-GS1-211 NONHSAT1: chr8  | 30545200  | 30547519  | + |
| TC0800000360.oe.1 | 2.17  | 1.12  | 2.17 | up   | 5.52  | 4.40  | Inc-NRG1-3 LNCipedia lc      | Inc-NRG1-3 --- chr8         | 32766125  | 32767959  | + |
| TC0800000623.oe.1 | -2.83 | -1.50 | 2.83 | down | 3.60  | 5.10  | NONHSAGO LNCipedia lc        | Inc-NKAIN3 NONHSAT1: chr8   | 63215981  | 63218034  | + |
| TC0800000688.oe.1 | -2.50 | -1.32 | 2.50 | down | 2.94  | 4.26  | Inc-RP11-3f LNCipedia lc     | Inc-RP11-3f NONHSAT1: chr8  | 71753355  | 71756706  | + |
| TC0800000700.oe.1 | 2.43  | 1.28  | 2.43 | up   | 11.51 | 10.23 | Inc-TERF1-4 LNCipedia lc     | Inc-TERF1-4 NONHSAT1: chr8  | 73321840  | 73323308  | + |
| TC0800000742.oe.1 | -2.07 | -1.05 | 2.07 | down | 9.03  | 10.08 | Inc-FAM164 LNCipedia lc      | Inc-FAM164 NONHSAT1: chr8   | 78718080  | 78719760  | + |
| TC0800000803.oe.1 | 2.04  | 1.03  | 2.04 | up   | 14.49 | 13.46 | Inc-OSGIN2 LNCipedia lc      | Inc-OSGIN2 NONHSAT1: chr8   | 89758142  | 89769824  | + |

|                    |       |       |      |      |       |       |                          |                               |           |           |   |
|--------------------|-------|-------|------|------|-------|-------|--------------------------|-------------------------------|-----------|-----------|---|
| TC0800000847.oe.1  | -2.16 | -1.11 | 2.16 | down | 5.96  | 7.07  | Inc-DPY19L4 LNCipedia    | lc Inc-DPY19L4 NONHSAT1:chr8  | 94793492  | 94793843  | + |
| TC0800000864.oe.1  | 2.26  | 1.18  | 2.26 | up   | 7.72  | 6.55  | Inc-SDC2-2 LNCipedia     | lc Inc-SDC2-2: NONHSAT1:chr8  | 96330317  | 96333892  | + |
| TC0800001059.oe.1  | 2.55  | 1.35  | 2.55 | up   | 6.75  | 5.40  | Inc-FER1L6- N/A//NONC    | Inc-FER1L6- NONHSAT1:chr8     | 124271683 | 124277584 | + |
| TC0800001065.oe.1  | -2.32 | -1.22 | 2.32 | down | 3.38  | 4.60  | Inc-ZNF572- LNCipedia    | lc Inc-ZNF572- --- chr8       | 125012451 | 125020276 | + |
| TC0800001073.oe.1  | 2.16  | 1.11  | 2.16 | up   | 8.03  | 6.92  | Inc-NSMCE2 LNCipedia     | lc Inc-NSMCE2 NONHSAT1:chr8   | 125432859 | 125433581 | + |
| TC0800001134.oe.1  | 5.37  | 2.42  | 5.37 | up   | 9.67  | 7.24  | Inc-WISP1-5 LNCipedia    | lc Inc-WISP1-5 NONHSAT1:chr8  | 133229056 | 133229697 | + |
| TC0800001297.oe.1  | -2.19 | -1.13 | 2.19 | down | 3.79  | 4.93  | Inc-C8orf42- LNCipedia   | lc Inc-C8orf42- NONHSAT1:chr8 | 664622    | 670092    | - |
| TC0800001446.oe.1  | 2.19  | 1.13  | 2.19 | up   | 4.43  | 3.30  | Inc-LONRF1 LNCipedia     | lc Inc-LONRF1 NONHSAT1:chr8   | 12696307  | 12697273  | - |
| TC0800001488.oe.1  | -2.81 | -1.49 | 2.81 | down | 3.19  | 4.68  | RP11-108A1 N/A           | --- --- chr8                  | 18864681  | 18865247  | - |
| TC0800001537.oe.1  | 2.55  | 1.35  | 2.55 | up   | 6.37  | 5.02  | Inc-NKX3-1- LNCipedia    | lc Inc-NKX3-1- NONHSAT1:chr8  | 23678694  | 23682937  | - |
| TC0800001576.oe.1  | 2.09  | 1.07  | 2.09 | up   | 5.12  | 4.05  | Inc-ZNF395- NONCODE      | lc Inc-ZNF395- NONHSAT1:chr8  | 28446963  | 28490226  | - |
| TC0800001732.oe.1  | 4.85  | 2.28  | 4.85 | up   | 5.48  | 3.20  | Inc-RNF170- NONCODE      | lc Inc-RNF170- NONHSAT1:chr8  | 43239511  | 43240930  | - |
| TC0800001889.oe.1  | -2.46 | -1.30 | 2.46 | down | 4.82  | 6.11  | Inc-ARMC1- LNCipedia     | lc Inc-ARMC1- NONHSAT1:chr8   | 65591850  | 65597752  | - |
| TC0800001902.oe.1  | -2.01 | -1.01 | 2.01 | down | 3.20  | 4.21  | Inc-MYBL1- LNCipedia     | lc Inc-MYBL1- NONHSAT1:chr8   | 66419587  | 66428977  | - |
| TC0800001922.oe.1  | -2.09 | -1.06 | 2.09 | down | 4.35  | 5.41  | Inc-RP11-66 NONCODE      | lc Inc-RP11-66 NONHSAT1:chr8  | 68974883  | 68976198  | - |
| TC0800001949.oe.1  | 2.30  | 1.20  | 2.30 | up   | 9.54  | 8.33  | Inc-TRPA1-2 LNCipedia    | lc Inc-TRPA1-2 NONHSAT1:chr8  | 71842349  | 71843413  | - |
| TC0800001951.oe.1  | 2.46  | 1.30  | 2.46 | up   | 6.04  | 4.75  | Inc-MSC-3 NONCODE        | lc Inc-MSC-3:1 NONHSAT1:chr8  | 72034310  | 72046545  | - |
| TC0800001997.oe.1  | 2.99  | 1.58  | 2.99 | up   | 6.04  | 4.46  | Inc-MRPS28 LNCipedia     | lc Inc-MRPS28 NONHSAT1:chr8   | 79764494  | 79766493  | - |
| TC0800002013.oe.1  | -2.08 | -1.06 | 2.08 | down | 4.33  | 5.38  | Inc-PAG1-1 LNCipedia     | lc Inc-PAG1-1 NONHSAT1:chr8   | 80628457  | 80631612  | - |
| TC0800002118.oe.1  | -2.21 | -1.14 | 2.21 | down | 4.11  | 5.25  | CTD-2006H LNCipedia      | lc Inc-RBM12B --- chr8        | 93715378  | 93716113  | - |
| TC0800002242.oe.1  | 2.60  | 1.38  | 2.60 | up   | 10.86 | 9.49  | Inc-KLF10-2 NONCODE      | lc Inc-KLF10-2 NONHSAT1:chr8  | 102648775 | 102653964 | - |
| TC0800002315.oe.1  | -3.06 | -1.61 | 3.06 | down | 4.37  | 5.99  | Inc-EIF3H-3 LNCipedia    | lc Inc-EIF3H-3 NONHSAT1:chr8  | 115568457 | 115569020 | - |
| TC0800002317.oe.1  | 3.30  | 1.72  | 3.30 | up   | 10.16 | 8.44  | NONHSAGO NONCODE         | lc Inc-EIF3H-2 NONHSAT1:chr8  | 116402543 | 116403757 | - |
| TC0800002342.oe.1  | -2.17 | -1.12 | 2.17 | down | 3.24  | 4.36  | Inc-TAF2-3 NONCODE       | lc Inc-TAF2-3:1 NONHSAT1:chr8 | 119572620 | 119578485 | - |
| TC0800002437.oe.1  | -2.26 | -1.18 | 2.26 | down | 3.67  | 4.85  | Inc-GSDMC- LNCipedia     | lc Inc-GSDMC- --- chr8        | 129285647 | 129310432 | - |
| TC0800002444.oe.1  | 3.69  | 1.88  | 3.69 | up   | 8.33  | 6.45  | Inc-GSDMC- LNCipedia     | lc Inc-GSDMC- NONHSAT1:chr8   | 129706110 | 129707182 | - |
| TC0800002481.oe.1  | 2.39  | 1.26  | 2.39 | up   | 11.93 | 10.67 | Inc-NDRG1- LNCipedia     | lc Inc-NDRG1- NONHSAT1:chr8   | 133454853 | 133458864 | - |
| TC0800002482.oe.1  | 2.12  | 1.08  | 2.12 | up   | 8.12  | 7.04  | Inc-NDRG1- NONCODE       | lc Inc-NDRG1- NONHSAT1:chr8   | 133476029 | 133571926 | - |
| TC0800002621.oe.1  | 2.14  | 1.10  | 2.14 | up   | 8.56  | 7.46  | Inc-SLC39A4 NONCODE      | lc Inc-SLC39A4 NONHSAT1:chr8  | 144393565 | 144394761 | - |
| TC0800002624.oe.1  | 2.22  | 1.15  | 2.22 | up   | 7.73  | 6.58  | Inc-CPSF1-1 LNCipedia    | lc Inc-CPSF1-1 NONHSAT1:chr8  | 144412415 | 144413586 | - |
| TC08000033.hg.4    | -2.18 | -1.13 | 2.18 | down | 3.68  | 4.81  | DEFB109P1E defensin, bei | --- --- chr8                  | 7312844   | 7319951   | + |
| TC08000568.hg.4    | -2.51 | -1.33 | 2.51 | down | 2.43  | 3.75  | RBM12B-AS RBM12B ant     | --- --- chr8                  | 93740111  | 93740819  | + |
| TC08001043.hg.4    | 2.26  | 1.18  | 2.26 | up   | 4.25  | 3.07  | BIN3-IT1 BIN3 intronic   | --- --- chr8                  | 22640369  | 22642209  | - |
| TC08001136.hg.4    | 3.26  | 1.71  | 3.26 | up   | 8.92  | 7.21  | LOC728024 chromosome     | --- --- chr8                  | 37746556  | 37748046  | - |
| TC09000000062.oe.1 | 2.71  | 1.44  | 2.71 | up   | 10.33 | 8.89  | Inc-CDC37L NONCODE       | lc Inc-CDC37L NONHSAT1:chr9   | 4793087   | 4841357   | + |
| TC09000000316.oe.1 | -2.10 | -1.07 | 2.10 | down | 3.53  | 4.60  | Inc-UNC13B NONCODE       | lc Inc-UNC13B NONHSAT1:chr9   | 35406788  | 35437833  | + |
| TC09000000319.oe.1 | 2.46  | 1.30  | 2.46 | up   | 8.63  | 7.33  | Inc-RUSC2- LNCipedia     | lc Inc-RUSC2- NONHSAT1:chr9   | 35607225  | 35608435  | + |
| TC09000000332.oe.1 | -2.56 | -1.36 | 2.56 | down | 13.88 | 15.24 | Inc-HRCT1- NONCODE       | lc Inc-HRCT1- NONHSAT1:chr9   | 35912942  | 35914642  | + |
| TC09000000646.oe.1 | -2.52 | -1.34 | 2.52 | down | 4.10  | 5.43  | Inc-NAA35- NONCODE       | lc Inc-NAA35- NONHSAT1:chr9   | 86570888  | 86588143  | + |
| TC09000000657.oe.1 | -2.76 | -1.46 | 2.76 | down | 11.31 | 12.78 | Inc-CTSL1-8 LNCipedia    | lc Inc-CTSL1-8 NONHSAT1:chr9  | 87639438  | 87640412  | + |
| TC09000000740.oe.1 | 2.14  | 1.10  | 2.14 | up   | 3.91  | 2.81  | Inc-PTPDC1 LNCipedia     | lc Inc-PTPDC1 --- chr9        | 94122974  | 94123577  | + |
| TC09000000938.oe.1 | -2.52 | -1.33 | 2.52 | down | 9.43  | 10.76 | Inc-DNAJC2 NONCODE       | lc Inc-DNAJC2 NONHSAT1:chr9   | 111929249 | 111931308 | + |
| TC0900001298.oe.1  | 2.16  | 1.11  | 2.16 | up   | 4.15  | 3.04  | Inc-PPP1R2f LNCipedia    | lc Inc-PPP1R2f NONHSAT1:chr9  | 135469113 | 135469802 | + |
| TC0900001534.oe.1  | 2.48  | 1.31  | 2.48 | up   | 4.58  | 3.27  | RP11-321L2 LNCipedia     | lc Inc-ELAVL2- NONHSAT1:chr9  | 23894990  | 23898056  | - |
| TC0900001616.oe.1  | 2.02  | 1.01  | 2.02 | up   | 6.10  | 5.09  | Inc-VCP-2 NONCODE        | lc Inc-VCP-2:1 NONHSAT1:chr9  | 35074779  | 35075509  | - |
| TC0900001683.oe.1  | -2.14 | -1.09 | 2.14 | down | 6.04  | 7.13  | Inc-ANKRD1 LNCipedia     | lc Inc-ANKRD1 NONHSAT1:chr9   | 39099815  | 39109287  | - |
| TC0900001685.oe.1  | -2.19 | -1.13 | 2.19 | down | 4.29  | 5.43  | Inc-ANKRD1 LNCipedia     | lc Inc-ANKRD1 NONHSAT1:chr9   | 39173794  | 39174513  | - |
| TC0900001811.oe.1  | -2.37 | -1.24 | 2.37 | down | 6.11  | 7.36  | Inc-APBA1- LNCipedia     | lc Inc-APBA1- NONHSAT1:chr9   | 69731932  | 69734258  | - |
| TC0900001864.oe.1  | -2.73 | -1.45 | 2.73 | down | 11.73 | 13.18 | Inc-GNA14- LNCipedia     | lc Inc-GNA14- NONHSAT1:chr9   | 77716723  | 77720497  | - |

|                   |       |       |      |      |       |       |                          |                          |      |           |           |   |
|-------------------|-------|-------|------|------|-------|-------|--------------------------|--------------------------|------|-----------|-----------|---|
| TC0900001865.oe.1 | -2.00 | -1.00 | 2.00 | down | 2.91  | 3.92  | Inc-GNAQ-4 LNCipedia     | lc Inc-GNAQ-4 ---        | chr9 | 78047328  | 78047558  | - |
| TC0900002102.oe.1 | 2.25  | 1.17  | 2.25 | up   | 4.29  | 3.12  | Inc-OR13C4 NONCODE       | cl Inc-OR13C4 NONHSAT1   | chr9 | 103960790 | 103963783 | - |
| TC0900002103.oe.1 | -2.50 | -1.32 | 2.50 | down | 3.79  | 5.11  | Inc-OR13C4 LNCipedia     | lc Inc-OR13C4 ---        | chr9 | 104013156 | 104031630 | - |
| TC0900002232.oe.1 | 3.92  | 1.97  | 3.92 | up   | 12.40 | 10.43 | Inc-MEGF9- NONCODE       | cl Inc-MEGF9- NONHSAT1   | chr9 | 120389195 | 120401019 | - |
| TC0900002260.oe.1 | -2.77 | -1.47 | 2.77 | down | 5.40  | 6.87  | Inc-RC3H2-1 LNCipedia    | lc Inc-RC3H2-1 NONHSAT1  | chr9 | 122844556 | 122848494 | - |
| TC0900002297.oe.1 | -2.28 | -1.19 | 2.28 | down | 3.51  | 4.70  | Inc-SCAI-2 LNCipedia     | lc Inc-SCAI-2-1 NONHSAT1 | chr9 | 124942608 | 124943495 | - |
| TC0900002298.oe.1 | -2.05 | -1.03 | 2.05 | down | 4.50  | 5.53  | Inc-GOLGA1 NONCODE       | cl Inc-GOLGA1 NONHSAT1   | chr9 | 124947607 | 124948492 | - |
| TC0900002315.oe.1 | 2.32  | 1.22  | 2.32 | up   | 5.08  | 3.87  | Inc-RPL12-4 LNCipedia    | lc Inc-RPL12-4 NONHSAT1  | chr9 | 127106925 | 127108047 | - |
| TC0900002316.oe.1 | -2.13 | -1.09 | 2.13 | down | 3.21  | 4.29  | Inc-ANGPTL LNCipedia     | lc Inc-ANGPTL ---        | chr9 | 127150992 | 127158555 | - |
| TC0900002335.oe.1 | 2.20  | 1.14  | 2.20 | up   | 8.02  | 6.89  | Inc-ST6GAL1 NONCODE      | cl Inc-ST6GAL1 NONHSAT1  | chr9 | 127908325 | 127912394 | - |
| TC0900002339.oe.1 | 2.11  | 1.07  | 2.11 | up   | 8.91  | 7.83  | Inc-DPM2-3 LNCipedia     | lc Inc-DPM2-3 NONHSAT1   | chr9 | 127953269 | 127980461 | - |
| TC0900002347.oe.1 | 2.10  | 1.07  | 2.10 | up   | 7.42  | 6.35  | Inc-PTGES2- LNCipedia    | lc Inc-PTGES2- NONHSAT1  | chr9 | 128177569 | 128179009 | - |
| TC0900002378.oe.1 | 2.51  | 1.33  | 2.51 | up   | 6.49  | 5.17  | Inc-TOR1A-1 LNCipedia    | lc Inc-TOR1A- NONHSAT1   | chr9 | 129738350 | 129739623 | - |
| TC0900002384.oe.1 | -2.06 | -1.05 | 2.06 | down | 4.93  | 5.97  | Inc-FNBP1-1 LNCipedia    | lc Inc-FNBP1-1 NONHSAT1  | chr9 | 130044951 | 130045620 | - |
| TC09001698.hg.4   | -2.66 | -1.41 | 2.66 | down | 5.11  | 6.53  | RNU6ATAC RNA, U6atac     | ---                      | chr9 | 134164439 | 134164564 | - |
| TC0X00000088.oe.1 | -2.09 | -1.06 | 2.09 | down | 3.53  | 4.59  | Inc-RAB9A-1 LNCipedia    | lc Inc-RAB9A-1 NONHSAT1  | chrX | 13767905  | 13769173  | + |
| TC0X00000148.oe.1 | -2.00 | -1.00 | 2.00 | down | 3.51  | 4.51  | GS1-358P8-4 LNCipedia    | lc Inc-PDK3-1: NONHSAT1  | chrX | 24545516  | 24550466  | + |
| TC0X00000161.oe.1 | -2.30 | -1.20 | 2.30 | down | 12.45 | 13.65 | Inc-PDK3-12 LNCipedia    | lc Inc-PDK3-12 ---       | chrX | 24909857  | 24910078  | + |
| TC0X00000190.oe.1 | -2.12 | -1.08 | 2.12 | down | 2.70  | 3.79  | Inc-GK-5//N LNCipedia    | lc Inc-GK-5:1 NONHSAT1   | chrX | 32754940  | 32756400  | + |
| TC0X00000260.oe.1 | 2.10  | 1.07  | 2.10 | up   | 9.27  | 8.20  | Inc-DUSP21 LNCipedia     | lc Inc-DUSP21 NONHSAT1   | chrX | 43743704  | 43744658  | + |
| TC0X00000299.oe.1 | 2.21  | 1.14  | 2.21 | up   | 8.90  | 7.76  | Inc-CDK16-1 LNCipedia    | lc Inc-CDK16-1 NONHSAT1  | chrX | 47241454  | 47242175  | + |
| TC0X00000300.oe.1 | 2.33  | 1.22  | 2.33 | up   | 8.98  | 7.76  | Inc-CDK16-4 LNCipedia    | lc Inc-CDK16-4 NONHSAT1  | chrX | 47247082  | 47247952  | + |
| TC0X00000336.oe.1 | 2.21  | 1.14  | 2.21 | up   | 9.83  | 8.69  | Inc-WAS-2 NONCODE        | cl Inc-WAS-2:1 NONHSAT1  | chrX | 48706303  | 48707857  | + |
| TC0X00000342.oe.1 | 2.93  | 1.55  | 2.93 | up   | 10.96 | 9.41  | Inc-ERAS-4 LNCipedia     | lc Inc-ERAS-4: NONHSAT1  | chrX | 48898510  | 48903084  | + |
| TC0X00000348.oe.1 | -2.75 | -1.46 | 2.75 | down | 3.00  | 4.47  | Inc-MAGIX-1 LNCipedia    | lc Inc-MAGIX-1 NONHSAT1  | chrX | 49133836  | 49134083  | + |
| TC0X00000355.oe.1 | -4.04 | -2.02 | 4.04 | down | 5.36  | 7.38  | Inc-GAGE12 LNCipedia     | lc Inc-GAGE12 NONHSAT1   | chrX | 49560842  | 49603790  | + |
| TC0X00000394.oe.1 | 2.76  | 1.46  | 2.76 | up   | 5.35  | 3.89  | Inc-TSPYL2- LNCipedia    | lc Inc-TSPYL2- NONHSAT1  | chrX | 53169097  | 53170914  | + |
| TC0X00000444.oe.1 | 2.03  | 1.02  | 2.03 | up   | 5.17  | 4.14  | NONHSAGO SPIN4 antisense | Inc-ZC3H12 NONHSAT1      | chrX | 63349646  | 63352178  | + |
| TC0X00000468.oe.1 | -2.73 | -1.45 | 2.73 | down | 8.47  | 9.92  | Inc-STARDB8 NONCODE      | cl Inc-STARDB8 NONHSAT1  | chrX | 68533180  | 68537282  | + |
| TC0X00000573.oe.1 | -2.10 | -1.07 | 2.10 | down | 3.59  | 4.66  | Inc-PGK1-3 LNCipedia     | lc Inc-PGK1-3: ---       | chrX | 78006117  | 78006439  | + |
| TC0X00000669.oe.1 | -2.07 | -1.05 | 2.07 | down | 3.08  | 4.13  | Inc-BHLHB9 LNCipedia     | lc Inc-BHLHB9 NONHSAT1   | chrX | 102785667 | 102786604 | + |
| TC0X00000672.oe.1 | -2.02 | -1.01 | 2.02 | down | 4.24  | 5.25  | Inc-BHLHB9 LNCipedia     | lc Inc-BHLHB9 NONHSAT1   | chrX | 102798396 | 102799560 | + |
| TC0X00000676.oe.1 | -2.11 | -1.07 | 2.11 | down | 3.74  | 4.81  | Inc-BHLHB9 LNCipedia     | lc Inc-BHLHB9 NONHSAT1   | chrX | 102806741 | 102807824 | + |
| TC0X00000700.oe.1 | -3.47 | -1.80 | 3.47 | down | 3.09  | 4.89  | Inc-CLDN2- NONCODE       | cl Inc-CLDN2- NONHSAT1   | chrX | 106865546 | 106866862 | + |
| TC0X00000719.oe.1 | 2.95  | 1.56  | 2.95 | up   | 9.60  | 8.04  | Inc-RGAG1- LNCipedia     | lc Inc-RGAG1- NONHSAT1   | chrX | 110175747 | 110177786 | + |
| TC0X00000762.oe.1 | -3.24 | -1.70 | 3.24 | down | 7.94  | 9.64  | Inc-WDR44- NONCODE       | cl Inc-WDR44- NONHSAT1   | chrX | 118578568 | 118588310 | + |
| TC0X00000874.oe.1 | 2.02  | 1.02  | 2.02 | up   | 5.29  | 4.28  | Inc-PHF6-1 LNCipedia     | lc Inc-PHF6-1: NONHSAT1  | chrX | 134493582 | 134493800 | + |
| TC0X00000903.oe.1 | 3.08  | 1.62  | 3.08 | up   | 6.94  | 5.32  | Inc-GPR112- LNCipedia    | lc Inc-GPR112- NONHSAT1  | chrX | 136207776 | 136209947 | + |
| TC0X00000982.oe.1 | -2.69 | -1.43 | 2.69 | down | 4.17  | 5.60  | Inc-CSAG1- LNCipedia     | lc Inc-CSAG1- NONHSAT1   | chrX | 152753921 | 152760222 | + |
| TC0X00001185.oe.1 | 2.03  | 1.02  | 2.03 | up   | 9.83  | 8.81  | Inc-APOO-1 LNCipedia     | lc Inc-APOO-1 NONHSAT1   | chrX | 23707717  | 23722742  | - |
| TC0X00001198.oe.1 | -2.11 | -1.08 | 2.11 | down | 13.44 | 14.51 | Inc-ARX-2 LNCipedia      | lc Inc-ARX-2:1 ---       | chrX | 24909857  | 24910078  | - |
| TC0X00001274.oe.1 | 2.06  | 1.04  | 2.06 | up   | 4.17  | 3.13  | Inc-CXorf36 LNCipedia    | lc Inc-CXorf36 ---       | chrX | 45631168  | 45631643  | - |
| TC0X00001326.oe.1 | 2.13  | 1.09  | 2.13 | up   | 5.99  | 4.89  | Inc-SLC35A2 LNCipedia    | lc Inc-SLC35A2 NONHSAT1  | chrX | 48914104  | 48914914  | - |
| TC0X00001386.oe.1 | 2.00  | 1.00  | 2.00 | up   | 11.18 | 10.18 | Inc-HSD17B LNCipedia     | lc Inc-HSD17B NONHSAT1   | chrX | 53431258  | 53432322  | - |
| TC0X00001388.oe.1 | 2.05  | 1.03  | 2.05 | up   | 4.07  | 3.04  | Inc-HSD17B LNCipedia     | lc Inc-HSD17B NONHSAT1   | chrX | 53456273  | 53457029  | - |
| TC0X00001460.oe.1 | -2.09 | -1.07 | 2.09 | down | 4.14  | 5.21  | DLG3-AS1// NONCODE       | cl Inc-TEX11-1 NONHSAT1  | chrX | 70452956  | 70455994  | - |
| TC0X00001555.oe.1 | 2.13  | 1.09  | 2.13 | up   | 4.18  | 3.09  | Inc-CHM-2 LNCipedia      | lc Inc-CHM-2: NONHSAT1   | chrX | 85849410  | 85850139  | - |
| TC0X00001557.oe.1 | -2.12 | -1.08 | 2.12 | down | 8.67  | 9.75  | Inc-POF1B-1 LNCipedia    | lc Inc-POF1B-1 NONHSAT1  | chrX | 85978656  | 85981809  | - |
| TC0X00001602.oe.1 | 2.18  | 1.13  | 2.18 | up   | 5.33  | 4.20  | Inc-ARMCXf LNCipedia     | lc Inc-ARMCXf NONHSAT1   | chrX | 101537485 | 101539276 | - |

|                   |       |       |      |      |       |       |                        |                                 |           |           |   |
|-------------------|-------|-------|------|------|-------|-------|------------------------|---------------------------------|-----------|-----------|---|
| TC0X00001657.oe.1 | -3.26 | -1.70 | 3.26 | down | 12.59 | 14.30 | Inc-IRS4-2 LNCipedia   | lc Inc-IRS4-2:1 NONHSAT1: chrX  | 109054131 | 109054562 | - |
| TC0X00001693.oe.1 | -2.08 | -1.06 | 2.08 | down | 7.17  | 8.23  | Inc-KLHL13- NONCODE    | cl Inc-KLHL13- NONHSAT1: chrX   | 117282456 | 117284368 | - |
| TC0X00001737.oe.1 | -2.16 | -1.11 | 2.16 | down | 6.42  | 7.53  | Inc-MRRFP1 NONCODE     | cl Inc-MRRFP1 NONHSAT1: chrX    | 123621475 | 123623042 | - |
| TC0X00001738.oe.1 | -3.40 | -1.77 | 3.40 | down | 10.91 | 12.67 | Inc-MRRFP1 LNCipedia   | lc Inc-MRRFP1 NONHSAT1: chrX    | 123623513 | 123624609 | - |
| TC0X00001739.oe.1 | -2.47 | -1.30 | 2.47 | down | 11.63 | 12.94 | Inc-MRRFP1 LNCipedia   | lc Inc-MRRFP1 NONHSAT1: chrX    | 123697726 | 123712904 | - |
| TC0X00001744.oe.1 | -2.33 | -1.22 | 2.33 | down | 5.56  | 6.78  | Inc-ODZ1-6 LNCipedia   | lc Inc-ODZ1-6 NONHSAT1: chrX    | 124101764 | 124102553 | - |
| TC0X00001773.oe.1 | -2.11 | -1.08 | 2.11 | down | 6.56  | 7.64  | Inc-IGSF1-4 LNCipedia  | lc Inc-IGSF1-4 --- chrX         | 131577001 | 131583478 | - |
| TC0X00001810.oe.1 | 3.25  | 1.70  | 3.25 | up   | 6.51  | 4.82  | Inc-ARHGEF NONCODE     | cl Inc-ARHGEF NONHSAT1: chrX    | 136807223 | 136807877 | - |
| TC0X00001814.oe.1 | 2.23  | 1.16  | 2.23 | up   | 10.37 | 9.21  | Inc-ARHGEF LNCipedia   | lc Inc-ARHGEF NONHSAT1: chrX    | 136879017 | 136880722 | - |
| TC0X00001834.oe.1 | -2.09 | -1.06 | 2.09 | down | 2.82  | 3.88  | Inc-CDR1-3 LNCipedia   | lc Inc-CDR1-3: NONHSAT1: chrX   | 140713836 | 140727872 | - |
| TC0X00001843.oe.1 | -2.23 | -1.16 | 2.23 | down | 5.21  | 6.37  | Inc-IDS-17 LNCipedia   | lc Inc-IDS-17:1 --- chrX        | 146621798 | 146622418 | - |
| TC0X00001858.oe.1 | 3.03  | 1.60  | 3.03 | up   | 14.20 | 12.60 | Inc-MAGEA5 LNCipedia   | lc Inc-MAGEA5 NONHSAT1: chrX    | 149478751 | 149478981 | - |
| TC0X00001883.oe.1 | -2.54 | -1.35 | 2.54 | down | 4.04  | 5.39  | Inc-CSAG1- LNCipedia   | lc Inc-CSAG1- NONHSAT1: chrX    | 152708261 | 152714549 | - |
| TC0X00001930.oe.1 | 2.90  | 1.54  | 2.90 | up   | 5.55  | 4.01  | Inc-GAB3-1 LNCipedia   | lc Inc-GAB3-1: NONHSAT1: chrX   | 154778723 | 154781596 | - |
| TC0X000246.hg.4   | 2.27  | 1.18  | 2.27 | up   | 4.31  | 3.13  | SSX6 synovial sarc --- | --- chrX                        | 48107980  | 48120691  | + |
| TC0X000404.hg.4   | 2.22  | 1.15  | 2.22 | up   | 3.52  | 2.37  | TSIX TSIX transcri --- | --- chrX                        | 73792205  | 73829231  | + |
| TC0Y00000123.oe.1 | -2.31 | -1.21 | 2.31 | down | 3.10  | 4.30  | Inc-CYorf15 LNCipedia  | lc Inc-CYorf15: NONHSAT1: chrY  | 19598188  | 19598757  | + |
| TC0Y00000162.oe.1 | -2.01 | -1.01 | 2.01 | down | 2.74  | 3.75  | Inc-DAZ2-7 LNCipedia   | lc Inc-DAZ2-7: NONHSAT1: chrY   | 23734193  | 23736249  | + |
| TC0Y00000178.oe.1 | -2.22 | -1.15 | 2.22 | down | 2.86  | 4.01  | Inc-DAZ4-1 LNCipedia   | lc Inc-DAZ4-1: NONHSAT1: chrY   | 24618028  | 24639148  | + |
| TC0Y00000205.oe.1 | -2.10 | -1.07 | 2.10 | down | 3.49  | 4.56  | Inc-PRYP4-1 LNCipedia  | lc Inc-PRYP4-1 NONHSAT1: chrY   | 56855538  | 56856204  | + |
| TC0Y00000266.oe.1 | -2.62 | -1.39 | 2.62 | down | 7.53  | 8.92  | Inc-AC0061 LNCipedia   | lc Inc-AC0061: NONHSAT1: chrY   | 10198504  | 10199102  | - |
| TC0Y00000271.oe.1 | 2.86  | 1.52  | 2.86 | up   | 4.69  | 3.18  | Inc-AC1348 NONCODE     | cl Inc-AC1348: NONHSAT1: chrY   | 11692704  | 11692929  | - |
| TC0Y00000312.oe.1 | -3.98 | -1.99 | 3.98 | down | 7.15  | 9.14  | Inc-HSFY2-1 LNCipedia  | lc Inc-HSFY2-1 NONHSAT1: chrY   | 18992467  | 18992709  | - |
| TC0Y00000393.oe.1 | 2.02  | 1.02  | 2.02 | up   | 4.52  | 3.51  | Inc-PRYP4-3 LNCipedia  | lc Inc-PRYP4-3 NONHSAT1: chrY   | 56703707  | 56707491  | - |
| TC1000000127.oe.1 | 3.95  | 1.98  | 3.95 | up   | 13.80 | 11.81 | Inc-ATP5C1- NONCODE    | cl Inc-ATP5C1- NONHSAT0: chr10  | 7703368   | 7720901   | + |
| TC1000000238.oe.1 | 2.73  | 1.45  | 2.73 | up   | 4.39  | 2.94  | Inc-C10orf1 LNCipedia  | lc Inc-C10orf1: NONHSAT0: chr10 | 19692310  | 19790401  | + |
| TC1000000269.oe.1 | 2.19  | 1.13  | 2.19 | up   | 3.71  | 2.58  | Inc-PTF1A-1 LNCipedia  | lc Inc-PTF1A-1 NONHSAT0: chr10  | 23258211  | 23258545  | + |
| TC1000000390.oe.1 | 2.03  | 1.02  | 2.03 | up   | 6.39  | 5.37  | Inc-CREM-3 NONCODE     | cl Inc-CREM-3 NONHSAT0: chr10   | 34875210  | 34875422  | + |
| TC1000000438.oe.1 | 4.20  | 2.07  | 4.20 | up   | 6.41  | 4.34  | Inc-CCNYL2 LNCipedia   | lc Inc-CCNYL2 NONHSAT0: chr10   | 41843735  | 41851732  | + |
| TC1000000439.oe.1 | 2.27  | 1.18  | 2.27 | up   | 5.51  | 4.32  | Inc-CCNYL2 gene_id XLO | Inc-CCNYL2 NONHSAT0: chr10      | 41848343  | 41856930  | + |
| TC1000000443.oe.1 | 3.01  | 1.59  | 3.01 | up   | 5.36  | 3.76  | Inc-BMS1-6 LNCipedia   | lc Inc-BMS1-6 NONHSAT0: chr10   | 42295630  | 42295874  | + |
| TC1000000507.oe.1 | -2.06 | -1.05 | 2.06 | down | 4.82  | 5.86  | Inc-PPYR1-2 LNCipedia  | lc Inc-PPYR1-2 NONHSAT0: chr10  | 46525314  | 46526388  | + |
| TC1000000538.oe.1 | -2.37 | -1.25 | 2.37 | down | 3.95  | 5.20  | Inc-WDFY4- LNCipedia   | lc Inc-WDFY4- --- chr10         | 49066718  | 49066994  | + |
| TC1000000650.oe.1 | -2.20 | -1.14 | 2.20 | down | 2.70  | 3.83  | Inc-HNRNP NONCODE      | cl Inc-HNRNP NONHSAT0: chr10    | 68412497  | 68413051  | + |
| TC1000000666.oe.1 | 5.58  | 2.48  | 5.58 | up   | 11.08 | 8.60  | Inc-SRGN-2 NONCODE     | cl Inc-SRGN-2 NONHSAT0: chr10   | 69088072  | 69104811  | + |
| TC1000000734.oe.1 | 2.08  | 1.05  | 2.08 | up   | 6.49  | 5.44  | Inc-FUT11-1 NONCODE    | cl Inc-FUT11-1 NONHSAT0: chr10  | 73746867  | 73752102  | + |
| TC1000000834.oe.1 | 2.03  | 1.02  | 2.03 | up   | 6.74  | 5.72  | LINC00857 NONCODE      | cl Inc-AL3591 NONHSAT0: chr10   | 80207710  | 80219657  | + |
| TC1000000889.oe.1 | -2.85 | -1.51 | 2.85 | down | 6.72  | 8.23  | Inc-PAPSS2- LNCipedia  | lc Inc-PAPSS2- --- chr10        | 87868872  | 87869144  | + |
| TC1000001165.oe.1 | -3.03 | -1.60 | 3.03 | down | 9.59  | 11.20 | Inc-MX11-2 LNCipedia   | lc Inc-MX11-2: NONHSAT0: chr10  | 110119315 | 110119690 | + |
| TC1000001166.oe.1 | -2.09 | -1.07 | 2.09 | down | 11.32 | 12.39 | Inc-MX11-1 NONCODE     | cl Inc-MX11-1: NONHSAT0: chr10  | 110124240 | 110130393 | + |
| TC1000001176.oe.1 | -2.18 | -1.12 | 2.18 | down | 9.67  | 10.79 | Inc-SHOC2- LNCipedia   | lc Inc-SHOC2- NONHSAT0: chr10   | 110885253 | 110898718 | + |
| TC1000001180.oe.1 | -2.66 | -1.41 | 2.66 | down | 9.86  | 11.27 | Inc-PDCD4- LNCipedia   | lc Inc-PDCD4- NONHSAT0: chr10   | 110965032 | 110985922 | + |
| TC1000001182.oe.1 | -2.07 | -1.05 | 2.07 | down | 3.36  | 4.41  | Inc-SHOC2- NONCODE     | cl Inc-SHOC2- NONHSAT0: chr10   | 111016820 | 111022987 | + |
| TC1000001269.oe.1 | 2.04  | 1.03  | 2.04 | up   | 4.31  | 3.28  | Inc-BAG3-2 NONCODE     | cl Inc-BAG3-2: NONHSAT0: chr10  | 119621068 | 119621880 | + |
| TC1000001379.oe.1 | 2.07  | 1.05  | 2.07 | up   | 10.38 | 9.33  | Inc-MGMT- LNCipedia    | lc Inc-MGMT-: NONHSAT0: chr10   | 130179374 | 130180382 | + |
| TC1000001431.oe.1 | -3.32 | -1.73 | 3.32 | down | 3.92  | 5.65  | Inc-CYP2E1- NONCODE    | cl Inc-CYP2E1- NONHSAT0: chr10  | 133779170 | 133785043 | + |
| TC1000001436.oe.1 | -2.10 | -1.07 | 2.10 | down | 7.63  | 8.70  | Inc-LARP4B- LNCipedia  | lc Inc-LARP4B- NONHSAT0: chr10  | 678455    | 678796    | - |
| TC1000001596.oe.1 | 2.21  | 1.15  | 2.21 | up   | 4.36  | 3.21  | Inc-BEND7- LNCipedia   | lc Inc-BEND7-: NONHSAT0: chr10  | 13646272  | 13654526  | - |
| TC1000001646.oe.1 | -2.54 | -1.34 | 2.54 | down | 4.04  | 5.39  | Inc-C10orf1 LNCipedia  | lc Inc-C10orf1: NONHSAT0: chr10 | 21170262  | 21173838  | - |

|                   |       |       |       |      |       |      |                        |                                 |           |           |   |
|-------------------|-------|-------|-------|------|-------|------|------------------------|---------------------------------|-----------|-----------|---|
| TC1000001650.oe.1 | -2.50 | -1.32 | 2.50  | down | 3.45  | 4.77 | Inc-C10orf1: LNCipedia | lc Inc-C10orf1: NONHSAT0: chr10 | 21487525  | 21490472  | - |
| TC1000001663.oe.1 | -2.06 | -1.04 | 2.06  | down | 3.35  | 4.39 | Inc-C10orf1: LNCipedia | lc Inc-C10orf1: NONHSAT0: chr10 | 22642022  | 22691830  | - |
| TC1000001803.oe.1 | 2.19  | 1.13  | 2.19  | up   | 5.66  | 4.53 | Inc-BMS1-1 LNCipedia   | lc Inc-BMS1-1 NONHSAT0: chr10   | 41854927  | 41855208  | - |
| TC1000001818.oe.1 | -2.10 | -1.07 | 2.10  | down | 3.36  | 4.43 | Inc-HNRNPF LNCipedia   | lc Inc-HNRNPF --- chr10         | 43221371  | 43232349  | - |
| TC1000001916.oe.1 | 2.01  | 1.00  | 2.01  | up   | 8.28  | 7.27 | Inc-SGMS1- LNCipedia   | lc Inc-SGMS1- NONHSAT0: chr10   | 50187211  | 50199146  | - |
| TC1000001926.oe.1 | -3.13 | -1.64 | 3.13  | down | 5.24  | 6.89 | Inc-A1CF-4 LNCipedia   | lc Inc-A1CF-4: NONHSAT0: chr10  | 50800033  | 50805968  | - |
| TC1000001937.oe.1 | -2.59 | -1.37 | 2.59  | down | 3.29  | 4.66 | Inc-MBL2-3; N/A//NONC  | Inc-MBL2-3: NONHSAT0: chr10     | 52556680  | 52755544  | - |
| TC1000001966.oe.1 | -2.85 | -1.51 | 2.85  | down | 5.15  | 6.66 | Inc-C10orf4( NONCODE   | cl Inc-C10orf4( NONHSAT0: chr10 | 60029691  | 60044803  | - |
| TC1000001968.oe.1 | -4.36 | -2.12 | 4.36  | down | 6.67  | 8.80 | Inc-C10orf4( LNCipedia | lc Inc-C10orf4( NONHSAT0: chr10 | 60061921  | 60064292  | - |
| TC1000001969.oe.1 | -3.71 | -1.89 | 3.71  | down | 7.76  | 9.65 | Inc-C10orf4( LNCipedia | lc Inc-C10orf4( NONHSAT0: chr10 | 60082508  | 60084715  | - |
| TC1000001970.oe.1 | -4.29 | -2.10 | 4.29  | down | 5.52  | 7.63 | Inc-C10orf4( LNCipedia | lc Inc-C10orf4( NONHSAT0: chr10 | 60138517  | 60140515  | - |
| TC1000001986.oe.1 | -2.17 | -1.12 | 2.17  | down | 5.88  | 7.00 | Inc-JMJD1C- NONCODE    | cl Inc-JMJD1C: NONHSAT0: chr10  | 63167221  | 63176555  | - |
| TC1000001988.oe.1 | -2.23 | -1.16 | 2.23  | down | 7.64  | 8.79 | Inc-EGR2-6 LNCipedia   | lc Inc-EGR2-6: NONHSAT0: chr10  | 63214896  | 63269253  | - |
| TC1000002028.oe.1 | -2.18 | -1.12 | 2.18  | down | 3.33  | 4.45 | Inc-SLC25A1 NONCODE    | cl Inc-SLC25A1 NONHSAT0: chr10  | 68691664  | 68692941  | - |
| TC1000002052.oe.1 | 2.15  | 1.11  | 2.15  | up   | 10.90 | 9.79 | Inc-PPA1-1 LNCipedia   | lc Inc-PPA1-1: NONHSAT0: chr10  | 70218779  | 70233911  | - |
| TC1000002054.oe.1 | -2.06 | -1.04 | 2.06  | down | 3.25  | 4.29 | Inc-NODAL- NONCODE     | cl Inc-NODAL- NONHSAT0: chr10   | 70485336  | 70486325  | - |
| TC1000002068.oe.1 | -3.22 | -1.69 | 3.22  | down | 4.12  | 5.80 | Inc-C10orf1( NONCODE   | cl Inc-C10orf1( NONHSAT0: chr10 | 71706223  | 71709214  | - |
| TC1000002176.oe.1 | 2.03  | 1.02  | 2.03  | up   | 6.16  | 5.14 | Inc-SFTPD-7 LNCipedia  | lc Inc-SFTPD-7 NONHSAT0: chr10  | 80031844  | 80032393  | - |
| TC1000002350.oe.1 | 2.11  | 1.08  | 2.11  | up   | 8.90  | 7.83 | Inc-CHUK-1 LNCipedia   | lc Inc-CHUK-1 NONHSAT0: chr10   | 100238183 | 100246116 | - |
| TC1000002413.oe.1 | -4.41 | -2.14 | 4.41  | down | 4.67  | 6.81 | Inc-ARL3-2 NONCODE     | cl Inc-ARL3-2: NONHSAT0: chr10  | 102830948 | 102831703 | - |
| TC1000002537.oe.1 | 2.21  | 1.15  | 2.21  | up   | 9.76  | 8.61 | Inc-PRDX3-4 NONCODE    | cl Inc-PRDX3-4 NONHSAT0: chr10  | 119158007 | 119164196 | - |
| TC1000002561.oe.1 | -2.01 | -1.01 | 2.01  | down | 3.88  | 4.89 | RP11-95I16. LNCipedia  | lc Inc-FGFR2-3 NONHSAT0: chr10  | 120925547 | 120980700 | - |
| TC1000002605.oe.1 | -2.55 | -1.35 | 2.55  | down | 5.63  | 6.98 | Inc-FAM53B LNCipedia   | lc Inc-FAM53B NONHSAT0: chr10   | 124778791 | 124779097 | - |
| TC1100000163.oe.1 | 2.02  | 1.02  | 2.02  | up   | 8.84  | 7.82 | Inc-OR10AB NONCODE     | cl Inc-OR10AB NONHSAT0: chr11   | 7649210   | 7650998   | + |
| TC1100000178.oe.1 | 2.15  | 1.10  | 2.15  | up   | 9.12  | 8.02 | Inc-AKIP1-9 NONCODE    | cl Inc-AKIP1-9 NONHSAT0: chr11  | 8682788   | 8684489   | + |
| TC1100000191.oe.1 | 2.18  | 1.12  | 2.18  | up   | 8.17  | 7.05 | Inc-IPO7-1 LNCipedia   | lc Inc-IPO7-1: NONHSAT0: chr11  | 94711107  | 9472716   | + |
| TC1100000225.oe.1 | 2.11  | 1.07  | 2.11  | up   | 9.38  | 8.31 | Inc-MICALC LNCipedia   | lc Inc-MICALC NONHSAT0: chr11   | 12225585  | 12227098  | + |
| TC1100000274.oe.1 | 2.06  | 1.04  | 2.06  | up   | 5.73  | 4.69 | Inc-NUCB2- NONCODE     | cl Inc-NUCB2- NONHSAT0: chr11   | 17013998  | 17052658  | + |
| TC1100000343.oe.1 | -2.06 | -1.04 | 2.06  | down | 2.40  | 3.44 | Inc-LUZP2-4 LNCipedia  | lc Inc-LUZP2-4 NONHSAT0: chr11  | 23673812  | 23675768  | + |
| TC1100000391.oe.1 | -2.09 | -1.06 | 2.09  | down | 5.58  | 6.64 | Inc-C11orf4( LNCipedia | lc Inc-C11orf4( NONHSAT0: chr11 | 30337010  | 30338431  | + |
| TC1100000601.oe.1 | -2.23 | -1.15 | 2.23  | down | 3.81  | 4.97 | Inc-OR4C13 LNCipedia   | lc Inc-OR4C13 NONHSAT0: chr11   | 49882999  | 49884093  | + |
| TC1100000702.oe.1 | 2.87  | 1.52  | 2.87  | up   | 4.88  | 3.36 | NONHSAG0 LNCipedia     | lc Inc-PGA5-1: NONHSAT0: chr11  | 61227168  | 61248533  | + |
| TC1100000724.oe.1 | 2.70  | 1.44  | 2.70  | up   | 7.93  | 6.49 | Inc-FEN1-4 NONCODE     | cl Inc-FEN1-4: NONHSAT0: chr11  | 61861973  | 61865319  | + |
| TC1100000848.oe.1 | 2.03  | 1.02  | 2.03  | up   | 7.36  | 6.34 | Inc-RAB1B-1 NONCODE    | cl Inc-RAB1B-1: NONHSAT0: chr11 | 66261930  | 66263062  | + |
| TC1100000940.oe.1 | -2.17 | -1.12 | 2.17  | down | 8.73  | 9.85 | Inc-LRP5-4 LNCipedia   | lc Inc-LRP5-4: NONHSAT0: chr11  | 68558196  | 68564407  | + |
| TC1100001044.oe.1 | 2.19  | 1.13  | 2.19  | up   | 3.85  | 2.72 | Inc-ATG16L2 LNCipedia  | lc Inc-ATG16L2 --- chr11        | 72931403  | 72936167  | + |
| TC1100001048.oe.1 | -3.21 | -1.68 | 3.21  | down | 3.52  | 5.20 | Inc-P2RY2-5 LNCipedia  | lc Inc-P2RY2-5 --- chr11        | 73065032  | 73065388  | + |
| TC1100001073.oe.1 | 2.05  | 1.03  | 2.05  | up   | 10.21 | 9.18 | Inc-POLD3-1 LNCipedia  | lc Inc-POLD3-1 NONHSAT0: chr11  | 74248243  | 74254702  | + |
| TC1100001092.oe.1 | 10.85 | 3.44  | 10.85 | up   | 10.06 | 6.62 | Inc-SLCO2B LNCipedia   | lc Inc-SLCO2B: NONHSAT0: chr11  | 75100563  | 75188233  | + |
| TC1100001094.oe.1 | 2.20  | 1.14  | 2.20  | up   | 5.59  | 4.45 | Inc-NEU3-3 NONCODE     | cl Inc-NEU3-3: NONHSAT0: chr11  | 75196275  | 75206400  | + |
| TC1100001170.oe.1 | -2.14 | -1.10 | 2.14  | down | 6.35  | 7.45 | Inc-ANKRD4 LNCipedia   | lc Inc-ANKRD4 NONHSAT0: chr11   | 83180144  | 83184520  | + |
| TC1100001313.oe.1 | -2.17 | -1.11 | 2.17  | down | 6.06  | 7.17 | Inc-YAP1-2 LNCipedia   | lc Inc-YAP1-2: NONHSAT0: chr11  | 102047468 | 102083419 | + |
| TC1100001351.oe.1 | -2.73 | -1.45 | 2.73  | down | 6.66  | 8.11 | Inc-ACAT1-1 LNCipedia  | lc Inc-ACAT1-1 NONHSAT0: chr11  | 108267340 | 108271352 | + |
| TC1100001352.oe.1 | -2.08 | -1.06 | 2.08  | down | 6.86  | 7.91 | Inc-ACAT1-1 LNCipedia  | lc Inc-ACAT1-1 NONHSAT0: chr11  | 108287178 | 108290667 | + |
| TC1100001353.oe.1 | -3.96 | -1.99 | 3.96  | down | 5.55  | 7.54 | Inc-ACAT1-1 LNCipedia  | lc Inc-ACAT1-1 NONHSAT0: chr11  | 108293385 | 108295370 | + |
| TC1100001464.oe.1 | 2.24  | 1.16  | 2.24  | up   | 4.09  | 2.93 | Inc-CD3G-1 LNCipedia   | lc Inc-CD3G-1 NONHSAT0: chr11   | 118304730 | 118313744 | + |
| TC1100001537.oe.1 | 2.10  | 1.07  | 2.10  | up   | 8.16  | 7.09 | Inc-CRTAM- NONCODE     | cl Inc-CRTAM- NONHSAT0: chr11   | 122709262 | 122779595 | + |
| TC1100001587.oe.1 | 2.17  | 1.12  | 2.17  | up   | 4.23  | 3.11 | Inc-PATE3-2 LNCipedia  | lc Inc-PATE3-2 NONHSAT0: chr11  | 125811751 | 125811959 | + |
| TC1100001689.oe.1 | 2.03  | 1.02  | 2.03  | up   | 5.57  | 4.55 | Inc-SIRT3-2 NONCODE    | cl Inc-SIRT3-2: NONHSAT0: chr11 | 203485    | 204363    | - |

|                   |       |       |      |      |       |       |                        |                                 |           |           |   |
|-------------------|-------|-------|------|------|-------|-------|------------------------|---------------------------------|-----------|-----------|---|
| TC1100001729.oe.1 | 2.85  | 1.51  | 2.85 | up   | 9.46  | 7.95  | Inc-POLR2L- LNCipedia  | lc Inc-POLR2L- NONHSAT0: chr11  | 881476    | 882176    | - |
| TC1100001794.oe.1 | 2.67  | 1.41  | 2.67 | up   | 5.47  | 4.06  | Inc-C11orf4( LNCipedia | lc Inc-C11orf4( NONHSAT0: chr11 | 4600800   | 4601565   | - |
| TC1100002079.oe.1 | 5.35  | 2.42  | 5.35 | up   | 8.93  | 6.51  | Inc-CCDC73 LNCipedia   | lc Inc-CCDC73 NONHSAT0: chr11   | 32389058  | 32396403  | - |
| TC1100002125.oe.1 | 2.43  | 1.28  | 2.43 | up   | 9.66  | 8.38  | Inc-RAG2-3 LNCipedia   | lc Inc-RAG2-3: NONHSAT0: chr11  | 36490377  | 36496510  | - |
| TC1100002126.oe.1 | -2.00 | -1.00 | 2.00 | down | 9.23  | 10.23 | Inc-RAG2-2 LNCipedia   | lc Inc-RAG2-2: --- chr11        | 36551310  | 36554855  | - |
| TC1100002186.oe.1 | 2.28  | 1.19  | 2.28 | up   | 7.38  | 6.19  | Inc-PEX16-4 NONCODE    | cl Inc-PEX16-4 NONHSAT0: chr11  | 46090507  | 46119827  | - |
| TC1100002248.oe.1 | -2.02 | -1.01 | 2.02 | down | 3.91  | 4.92  | Inc-OR4C46 LNCipedia   | lc Inc-OR4C46 NONHSAT0: chr11   | 54543571  | 54559115  | - |
| TC1100002267.oe.1 | 3.23  | 1.69  | 3.23 | up   | 6.26  | 4.56  | Inc-SLC43A3 NONCODE    | cl Inc-SLC43A3: NONHSAT0: chr11 | 57406954  | 57408749  | - |
| TC1100002392.oe.1 | -2.23 | -1.16 | 2.23 | down | 9.46  | 10.62 | Inc-ATL3-2 LNCipedia   | lc Inc-ATL3-2: NONHSAT0: chr11  | 63624084  | 63627853  | - |
| TC1100002451.oe.1 | -2.17 | -1.12 | 2.17 | down | 10.72 | 11.84 | Inc-LTBP3-2 NONCODE    | l Inc-LTBP3-2 NONHSAT0: chr11   | 65422322  | 65511027  | - |
| TC1100002525.oe.1 | 2.40  | 1.26  | 2.40 | up   | 6.07  | 4.81  | Inc-ALDH3B NONCODE     | cl Inc-ALDH3B NONHSAT0: chr11   | 67749043  | 67756968  | - |
| TC1100002651.oe.1 | -2.13 | -1.09 | 2.13 | down | 3.04  | 4.12  | Inc-OR2AT4 LNCipedia   | lc Inc-OR2AT4 --- chr11         | 74938634  | 74939132  | - |
| TC1100002694.oe.1 | -2.84 | -1.50 | 2.84 | down | 2.96  | 4.46  | Inc-PAK1-3 LNCipedia   | lc Inc-PAK1-3: --- chr11        | 77294538  | 77294798  | - |
| TC1100002760.oe.1 | 2.32  | 1.21  | 2.32 | up   | 4.56  | 3.35  | Inc-CCDC89 LNCipedia   | lc Inc-CCDC89 --- chr11         | 85694324  | 85694600  | - |
| TC1100002812.oe.1 | -2.46 | -1.30 | 2.46 | down | 3.84  | 5.14  | Inc-CHORD( LNCipedia   | lc Inc-CHORD( NONHSAT0: chr11   | 90194506  | 90198120  | - |
| TC1100002859.oe.1 | -2.11 | -1.08 | 2.11 | down | 5.97  | 7.04  | Inc-MTMR2- NONCODE     | cl Inc-MTMR2- NONHSAT0: chr11   | 95775854  | 95789782  | - |
| TC1100002894.oe.1 | 3.38  | 1.76  | 3.38 | up   | 7.31  | 5.55  | Inc-MMP10- LNCipedia   | lc Inc-MMP10- NONHSAT0: chr11   | 102797044 | 102797339 | - |
| TC1100002895.oe.1 | 5.16  | 2.37  | 5.16 | up   | 8.98  | 6.61  | Inc-MMP10- LNCipedia   | lc Inc-MMP10- NONHSAT0: chr11   | 102797397 | 102798146 | - |
| TC1100002899.oe.1 | 2.09  | 1.06  | 2.09 | up   | 7.81  | 6.75  | Inc-MMP13- NONCODE     | cl Inc-MMP13- NONHSAT0: chr11   | 103089271 | 103092126 | - |
| TC1100002901.oe.1 | 2.08  | 1.06  | 2.08 | up   | 4.70  | 3.64  | Inc-DCUN1( NONCODE     | cl Inc-DCUN1( NONHSAT0: chr11   | 103402588 | 103403422 | - |
| TC1100002938.oe.1 | -2.10 | -1.07 | 2.10 | down | 5.73  | 6.80  | Inc-C11orf6( LNCipedia | lc Inc-C11orf6( NONHSAT0: chr11 | 108158638 | 108161683 | - |
| TC1100002954.oe.1 | -2.20 | -1.14 | 2.20 | down | 12.51 | 13.65 | Inc-ARHGAF LNCipedia   | lc Inc-ARHGAF NONHSAT0: chr11   | 110230175 | 110230558 | - |
| TC1100002985.oe.1 | -2.04 | -1.03 | 2.04 | down | 2.51  | 3.54  | NONHSAG0 gene_id XLO   | Inc-IL18-1:2 NONHSAT0: chr11    | 112165197 | 112172606 | - |
| TC1100003047.oe.1 | 2.05  | 1.03  | 2.05 | up   | 7.81  | 6.78  | Inc-AP0008( LNCipedia  | lc Inc-AP0008( NONHSAT0: chr11  | 117290487 | 117291765 | - |
| TC1100003133.oe.1 | -2.13 | -1.09 | 2.13 | down | 3.34  | 4.43  | Inc-BLID-5// LNCipedia | lc Inc-BLID-5:1 NONHSAT0: chr11 | 122095900 | 122098353 | - |
| TC1100003141.oe.1 | 2.07  | 1.05  | 2.07 | up   | 18.85 | 17.80 | Inc-CLMP-3 LNCipedia   | lc Inc-CLMP-3 NONHSAT0: chr11   | 123057493 | 123062136 | - |
| TC11000245.hg.4   | -2.11 | -1.08 | 2.11 | down | 2.89  | 3.98  | SPTY2D1-A( SPTY2D1 an  | --- --- chr11                   | 18599787  | 18610255  | + |
| TC11000631.hg.4   | -3.35 | -1.74 | 3.35 | down | 14.10 | 15.84 | MALAT1 metastasis a    | --- --- chr11                   | 65497762  | 65506469  | + |
| TC11002277.hg.4   | -4.27 | -2.09 | 4.27 | down | 5.71  | 7.80  | COLCA1 colorectal ca   | --- --- chr11                   | 111293389 | 111305045 | - |
| TC1200000029.oe.1 | 2.15  | 1.11  | 2.15 | up   | 12.35 | 11.24 | Inc-ERC1-1 NONCODE     | cl Inc-ERC1-1: NONHSAT0: chr12  | 1500491   | 1507318   | + |
| TC1200000147.oe.1 | 2.04  | 1.03  | 2.04 | up   | 7.29  | 6.27  | Inc-U47924. NONCODE    | cl Inc-U47924. NONHSAT0: chr12  | 7060717   | 7062808   | + |
| TC1200000148.oe.1 | 3.19  | 1.67  | 3.19 | up   | 11.98 | 10.31 | Inc-U47924. LNCipedia  | lc Inc-U47924. NONHSAT0: chr12  | 7066192   | 7068530   | + |
| TC1200000243.oe.1 | -2.09 | -1.06 | 2.09 | down | 5.15  | 6.21  | RP11-180M: N/A         | --- --- chr12                   | 12718973  | 12719521  | + |
| TC1200000277.oe.1 | 2.44  | 1.29  | 2.44 | up   | 5.60  | 4.32  | Inc-H2AFJ-4 NONCODE    | cl Inc-H2AFJ-4 NONHSAT0: chr12  | 14786070  | 14787500  | + |
| TC1200000314.oe.1 | -2.02 | -1.01 | 2.02 | down | 3.97  | 4.98  | NONHSAG0 LNCipedia     | lc Inc-AEBP2- ( NONHSAT0: chr12 | 19147074  | 19154659  | + |
| TC1200000332.oe.1 | -2.06 | -1.04 | 2.06 | down | 7.91  | 8.95  | Inc-GOLT1B LNCipedia   | lc Inc-GOLT1B NONHSAT0: chr12   | 21454782  | 21456062  | + |
| TC1200000390.oe.1 | 2.03  | 1.02  | 2.03 | up   | 5.97  | 4.95  | Inc-STK38L- NONCODE    | cl Inc-STK38L- NONHSAT0: chr12  | 27368317  | 27377503  | + |
| TC1200000406.oe.1 | -2.09 | -1.07 | 2.09 | down | 3.99  | 5.06  | Inc-KLHDC5 NONCODE     | cl Inc-KLHDC5 NONHSAT0: chr12   | 28161256  | 28163249  | + |
| TC1200000409.oe.1 | -2.29 | -1.19 | 2.29 | down | 3.90  | 5.10  | RP11-425D1 N/A         | --- --- chr12                   | 28236227  | 28236828  | + |
| TC1200000496.oe.1 | -2.02 | -1.01 | 2.02 | down | 2.84  | 3.85  | Inc-C12orf4( LNCipedia | lc Inc-C12orf4( --- chr12       | 40050421  | 40051840  | + |
| TC1200000545.oe.1 | -2.03 | -1.02 | 2.03 | down | 3.57  | 4.59  | Inc-FAM113 gene_id XLO | Inc-FAM113 NONHSAT0: chr12      | 47248124  | 47258595  | + |
| TC1200000660.oe.1 | 2.22  | 1.15  | 2.22 | up   | 5.96  | 4.81  | Inc-AC0210( NONCODE    | cl Inc-AC0210( NONHSAT0: chr12  | 52241545  | 52252186  | + |
| TC1200000693.oe.1 | -2.25 | -1.17 | 2.25 | down | 4.59  | 5.76  | Inc-TARBP2- LNCipedia  | lc Inc-TARBP2- NONHSAT0: chr12  | 53639006  | 53639268  | + |
| TC1200000752.oe.1 | -2.83 | -1.50 | 2.83 | down | 8.10  | 9.60  | Inc-RP11-6C LNCipedia  | lc Inc-RP11-6C NONHSAT0: chr12  | 56086519  | 56088064  | + |
| TC1200000754.oe.1 | -2.66 | -1.41 | 2.66 | down | 3.75  | 5.16  | Inc-RP11-6C LNCipedia  | lc Inc-RP11-6C NONHSAT0: chr12  | 56093514  | 56093992  | + |
| TC1200000756.oe.1 | -2.13 | -1.09 | 2.13 | down | 5.43  | 6.52  | Inc-RP11-6C NONCODE    | cl Inc-RP11-6C NONHSAT0: chr12  | 56099866  | 56100300  | + |
| TC1200000758.oe.1 | 2.05  | 1.03  | 2.05 | up   | 9.34  | 8.30  | Inc-ZC3H10 NONCODE     | cl Inc-ZC3H10 NONHSAT0: chr12   | 56116590  | 56117831  | + |
| TC1200000848.oe.1 | 2.54  | 1.34  | 2.54 | up   | 4.23  | 2.88  | Inc-TMEM5- LNCipedia   | lc Inc-TMEM5- --- chr12         | 63892328  | 63900553  | + |
| TC1200000881.oe.1 | -3.02 | -1.59 | 3.02 | down | 3.06  | 4.66  | Inc-IRAK3-4 LNCipedia  | lc Inc-IRAK3-4 --- chr12        | 65949374  | 65949721  | + |

|                   |       |       |      |      |       |       |             |           |              |                |           |           |          |   |
|-------------------|-------|-------|------|------|-------|-------|-------------|-----------|--------------|----------------|-----------|-----------|----------|---|
| TC1200000930.oe.1 | 2.62  | 1.39  | 2.62 | up   | 13.32 | 11.93 | Inc-LYZ-2   | NONCODE   | Inc-LYZ-2:1  | NONHSAT0:chr12 | 69239620  | 69258189  | +        |   |
| TC1200001005.oe.1 | 3.94  | 1.98  | 3.94 | up   | 6.92  | 4.94  | Inc-SYT1-10 | LNCipedia | Inc-SYT1-10  | NONHSAT0:chr12 | 77940267  | 77950895  | +        |   |
| TC1200001006.oe.1 | 5.86  | 2.55  | 5.86 | up   | 11.03 | 8.47  | Inc-SYT1-9  | NONCODE   | Inc-SYT1-9:  | NONHSAT0:chr12 | 77966276  | 78006594  | +        |   |
| TC1200001007.oe.1 | 3.98  | 1.99  | 3.98 | up   | 7.53  | 5.54  | Inc-SYT1-8  | NONCODE   | Inc-SYT1-8:  | NONHSAT0:chr12 | 78007178  | 78010897  | +        |   |
| TC1200001008.oe.1 | 3.77  | 1.91  | 3.77 | up   | 9.20  | 7.29  | Inc-SYT1-7  | LNCipedia | Inc-SYT1-7:  | NONHSAT0:chr12 | 78199159  | 78200562  | +        |   |
| TC1200001134.oe.1 | 2.28  | 1.19  | 2.28 | up   | 6.00  | 4.81  | Inc-RP11-53 | LNCipedia | Inc-RP11-53  | NONHSAT0:chr12 | 95865079  | 95866451  | +        |   |
| TC1200001176.oe.1 | -2.19 | -1.13 | 2.19 | down | 10.29 | 11.42 | Inc-NR1H4-  | NONCODE   | Inc-NR1H4-   | NONHSAT0:chr12 | 100601642 | 100618687 | +        |   |
| TC1200001229.oe.1 | -2.11 | -1.08 | 2.11 | down | 9.68  | 10.76 | Inc-C12orf7 | NONCODE   | Inc-C12orf7: | NONHSAT0:chr12 | 105156615 | 105162790 | +        |   |
| TC1200001315.oe.1 | 2.07  | 1.05  | 2.07 | up   | 5.96  | 4.91  | Inc-ALDH2-  | LNCipedia | Inc-ALDH2-   | NONHSAT0:chr12 | 111843032 | 111843423 | +        |   |
| TC1200001334.oe.1 | 3.57  | 1.84  | 3.57 | up   | 8.70  | 6.86  | Inc-OAS2-2  | LNCipedia | Inc-OAS2-2   | NONHSAT0:chr12 | 112969332 | 112970705 | +        |   |
| TC1200001416.oe.1 | 3.83  | 1.94  | 3.83 | up   | 7.54  | 5.60  | Inc-SRRM4-  | NONCODE   | Inc-SRRM4-   | NONHSAT0:chr12 | 119186800 | 119193828 | +        |   |
| TC1200001428.oe.1 | 2.62  | 1.39  | 2.62 | up   | 7.45  | 6.06  | Inc-SIRT4-7 | LNCipedia | Inc-SIRT4-7: | NONHSAT0:chr12 | 120080681 | 120090027 | +        |   |
| TC1200001468.oe.1 | 2.16  | 1.11  | 2.16 | up   | 6.17  | 5.06  | Inc-PSMD9-  | NONCODE   | Inc-PSMD9-   | NONHSAT0:chr12 | 121902048 | 121921391 | +        |   |
| TC1200001484.oe.1 | -2.43 | -1.28 | 2.43 | down | 8.92  | 10.21 | Inc-DENR-5  | LNCipedia | Inc-DENR-5   | NONHSAT0:chr12 | 122592818 | 122602644 | +        |   |
| TC1200001485.oe.1 | -2.69 | -1.43 | 2.69 | down | 9.78  | 11.20 | Inc-DENR-4  | LNCipedia | Inc-DENR-4   | NONHSAT0:chr12 | 122609197 | 122613669 | +        |   |
| TC1200001570.oe.1 | -2.26 | -1.17 | 2.26 | down | 14.20 | 15.37 | Inc-TMEM13  | LNCipedia | Inc-TMEM13   | NONHSAT0:chr12 | 127165923 | 127166390 | +        |   |
| TC1200001653.oe.1 | 2.10  | 1.07  | 2.10 | up   | 10.82 | 9.74  | Inc-PXMP2-  | LNCipedia | Inc-PXMP2-   | NONHSAT0:chr12 | 132717966 | 132721084 | +        |   |
| TC1200001672.oe.1 | 2.00  | 1.00  | 2.00 | up   | 7.40  | 6.39  | Inc-IQSEC3- | LNCipedia | Inc-IQSEC3-  | NONHSAT0:chr12 | 18117     | 26957     | -        |   |
| TC1200001677.oe.1 | 2.67  | 1.42  | 2.67 | up   | 5.40  | 3.98  | OTTHUMG0    | LNCipedia | Inc-SLC6A12  | NONHSAT0:chr12 | 164664    | 166321    | -        |   |
| TC1200001682.oe.1 | -2.03 | -1.02 | 2.03 | down | 4.19  | 5.21  | NONHSAG0    | LNCipedia | Inc-KDM5A-   | NONHSAT0:chr12 | 273954    | 277123    | -        |   |
| TC1200001697.oe.1 | 2.34  | 1.22  | 2.34 | up   | 5.47  | 4.25  | Inc-CACNA2  | LNCipedia | Inc-CACNA2   | NONHSAT0:chr12 | 1587361   | 1593038   | -        |   |
| TC1200001784.oe.1 | 2.17  | 1.12  | 2.17 | up   | 7.25  | 6.13  | Inc-CHD4-1  | NONCODE   | Inc-CHD4-1   | NONHSAT0:chr12 | 6566576   | 6568296   | -        |   |
| TC1200001809.oe.1 | 3.08  | 1.62  | 3.08 | up   | 5.66  | 4.04  | Inc-RBP5-5  | NONCODE   | Inc-RBP5-5:  | NONHSAT0:chr12 | 7089648   | 7090358   | -        |   |
| TC1200001810.oe.1 | 2.58  | 1.37  | 2.58 | up   | 4.80  | 3.43  | Inc-RBP5-4  | NONCODE   | Inc-RBP5-4:  | NONHSAT0:chr12 | 7091156   | 7092493   | -        |   |
| TC1200001826.oe.1 | 2.57  | 1.36  | 2.57 | up   | 6.86  | 5.50  | Inc-SLC2A14 | LNCipedia | Inc-SLC2A14  | NONHSAT0:chr12 | 7921547   | 7925908   | -        |   |
| TC1200001891.oe.1 | -2.02 | -1.01 | 2.02 | down | 4.46  | 5.47  | Inc-TAS2R5  | NONCODE   | Inc-TAS2R5   | NONHSAT0:chr12 | 10964425  | 10965352  | -        |   |
| TC1200001900.oe.1 | -2.18 | -1.13 | 2.18 | down | 7.98  | 9.11  | Inc-MANSC   | LNCipedia | Inc-MANSC    | NONHSAT0:chr12 | 12116029  | 12119873  | -        |   |
| TC1200001977.oe.1 | 2.97  | 1.57  | 2.97 | up   | 4.65  | 3.07  | Inc-C12orf7 | NONCODE   | Inc-C12orf7  | NONHSAT0:chr12 | 24817656  | 24830328  | -        |   |
| TC1200001988.oe.1 | -2.07 | -1.05 | 2.07 | down | 3.13  | 4.18  | Inc-KRAS-3  | NONCODE   | Inc-KRAS-3:  | NONHSAT0:chr12 | 25435581  | 25436238  | -        |   |
| TC1200002097.oe.1 | -2.20 | -1.14 | 2.20 | down | 6.59  | 7.72  | Inc-ABCD2-  | NONCODE   | Inc-ABCD2-   | NONHSAT0:chr12 | 39309752  | 39321648  | -        |   |
| TC1200002127.oe.1 | -2.88 | -1.52 | 2.88 | down | 5.26  | 6.79  | Inc-PUS7L-1 | LNCipedia | Inc-PUS7L-1  | NONHSAT0:chr12 | 43718993  | 43724000  | -        |   |
| TC1200002143.oe.1 | -2.07 | -1.05 | 2.07 | down | 13.31 | 14.36 | Inc-SLC38A1 | LNCipedia | Inc-SLC38A1  | NONHSAT0:chr12 | 45924947  | 45926710  | -        |   |
| TC1200002179.oe.1 | 3.16  | 1.66  | 3.16 | up   | 7.92  | 6.25  | Inc-HDAC7-  | LNCipedia | Inc-HDAC7-   | NONHSAT0:chr12 | 47865053  | 47879044  | -        |   |
| TC1200002220.oe.1 | 2.44  | 1.29  | 2.44 | up   | 10.33 | 9.04  | Inc-LMBR1L  | LNCipedia | Inc-LMBR1L   | NONHSAT0:chr12 | 49128981  | 49131395  | -        |   |
| TC1200002222.oe.1 | 2.26  | 1.17  | 2.26 | up   | 7.95  | 6.78  | OTTHUMG0    | LNCipedia | Inc-C1QL4-   | NONHSAT0:chr12 | 49265156  | 49273306  | -        |   |
| TC1200002306.oe.1 | 2.01  | 1.01  | 2.01 | up   | 5.31  | 4.30  | NONHSAG0    | LNCipedia | Inc-AAAS-1:  | NONHSAT0:chr12 | 53298655  | 53300314  | -        |   |
| TC1200002307.oe.1 | 2.05  | 1.04  | 2.05 | up   | 7.56  | 6.52  | Inc-SP7-2   | NONCODE   | Inc-SP7-2:1  | NONHSAT0:chr12 | 53307738  | 53315127  | -        |   |
| TC1200002336.oe.1 | 2.18  | 1.12  | 2.18 | up   | 5.69  | 4.57  | Inc-ZNF385  | LNCipedia | Inc-ZNF385   | NONHSAT0:chr12 | 54403632  | 54404629  | -        |   |
| TC1200002349.oe.1 | 2.26  | 1.18  | 2.26 | up   | 9.09  | 7.91  | Inc-OR6C70  | LNCipedia | Inc-OR6C70   | NONHSAT0:chr12 | 55412625  | 55413431  | -        |   |
| TC1200002375.oe.1 | -2.28 | -1.19 | 2.28 | down | 4.88  | 6.07  | Inc-SMARCC  | LNCipedia | Inc-SMARCC   | NONHSAT0:chr12 | 56103124  | 56103508  | -        |   |
| TC1200002376.oe.1 | 2.10  | 1.07  | 2.10 | up   | 7.17  | 6.10  | Inc-SMARCC  | LNCipedia | Inc-SMARCC   | NONHSAT0:chr12 | 56104614  | 56113905  | -        |   |
| TC1200002403.oe.1 | 2.76  | 1.46  | 2.76 | up   | 8.67  | 7.21  | Inc-NACA-2  | LNCipedia | Inc-NACA-2   | NONHSAT0:chr12 | 56688026  | 56688226  | -        |   |
| TC1200002526.oe.1 | -2.06 | -1.04 | 2.06 | down | 3.06  | 4.11  | RP11-1143G  | N/A       | ---          | ---            | chr12     | 69326574  | 69331882 | - |
| TC1200002530.oe.1 | -2.18 | -1.13 | 2.18 | down | 2.41  | 3.54  | LOC101928   | LNCipedia | Inc-BEST3-1  | NONHSAT0:chr12 | 69705973  | 69738568  | -        |   |
| TC1200002544.oe.1 | 2.16  | 1.11  | 2.16 | up   | 5.92  | 4.81  | NONHSAG0    | LNCipedia | Inc-TSPAN8   | NONHSAT0:chr12 | 71047402  | 71118247  | -        |   |
| TC1200002589.oe.1 | 2.16  | 1.11  | 2.16 | up   | 8.19  | 7.07  | Inc-E2F7-7  | LNCipedia | Inc-E2F7-7:1 | NONHSAT0:chr12 | 76858716  | 76864954  | -        |   |
| TC1200002617.oe.1 | -2.03 | -1.02 | 2.03 | down | 4.63  | 5.65  | Inc-LIN7A-3 | LNCipedia | Inc-LIN7A-3  | NONHSAT0:chr12 | 80792520  | 80795906  | -        |   |
| TC1200002815.oe.1 | 6.71  | 2.75  | 6.71 | up   | 7.73  | 4.98  | OTTHUMG0    | NONCODE   | Inc-NFYB-1:  | NONHSAT0:chr12 | 104262314 | 104280722 | -        |   |
| TC1200002923.oe.1 | 2.37  | 1.25  | 2.37 | up   | 5.65  | 4.41  | Inc-NAA25-  | NONCODE   | Inc-NAA25-   | NONHSAT0:chr12 | 112160263 | 112162262 | -        |   |



|                   |       |       |       |      |       |       |                         |                                |           |           |   |
|-------------------|-------|-------|-------|------|-------|-------|-------------------------|--------------------------------|-----------|-----------|---|
| TC1200002932.oe.1 | 2.30  | 1.20  | 2.30  | up   | 6.76  | 5.55  | Inc-IQCD-1 LNCipedia    | lc Inc-IQCD-1: NONHSAT0: chr12 | 113176828 | 113177363 | - |
| TC1200002946.oe.1 | 20.83 | 4.38  | 20.83 | up   | 9.66  | 5.28  | Inc-TBX5-4 NONCODE      | l Inc-TBX5-4: NONHSAT0: chr12  | 114677581 | 114680987 | - |
| TC1200003041.oe.1 | 2.19  | 1.13  | 2.19  | up   | 7.44  | 6.31  | OTTHUMG0 NONCODE        | c Inc-SPPL3.1: NONHSAT0: chr12 | 120696314 | 120703825 | - |
| TC1200003059.oe.1 | 2.63  | 1.40  | 2.63  | up   | 6.21  | 4.81  | Inc-RHOF-4 LNCipedia    | lc Inc-RHOF-4 NONHSAT0: chr12  | 121856598 | 121858855 | - |
| TC1200003076.oe.1 | -2.47 | -1.31 | 2.47  | down | 10.69 | 11.99 | Inc-CDK2AP NONCODE      | c Inc-CDK2AP NONHSAT0: chr12   | 123230037 | 123233101 | - |
| TC1200003096.oe.1 | -7.53 | -2.91 | 7.53  | down | 2.87  | 5.78  | RP11-214K3 LNCipedia    | lc Inc-DNAH1( NONHSAT0: chr12  | 123966077 | 123966629 | - |
| TC1200003099.oe.1 | -2.67 | -1.42 | 2.67  | down | 4.64  | 6.06  | RP11-214K3 LNCipedia    | lc Inc-DNAH1( NONHSAT0: chr12  | 123971457 | 123971714 | - |
| TC1200003229.oe.1 | 2.04  | 1.03  | 2.04  | up   | 4.89  | 3.87  | Inc-GALNT9 NONCODE      | c Inc-GALNT9 NONHSAT0: chr12   | 132141006 | 132142373 | - |
| TC12001201.hg.4   | 2.49  | 1.31  | 2.49  | up   | 7.13  | 5.82  | LOC642846/ DEAD/H (Asj  | --- chr12                      | 9417691   | 9448228   | - |
| TC12001420.hg.4   | -4.24 | -2.08 | 4.24  | down | 2.73  | 4.81  | RNY5 RNA, Ro-ass        | --- chr12                      | 45187091  | 45187469  | - |
| TC12002057.hg.4   | -3.85 | -1.95 | 3.85  | down | 7.58  | 9.52  | HNF1A-AS1 HNF1A antis   | --- chr12                      | 120969838 | 120972292 | - |
| TC1300000197.oe.1 | 2.55  | 1.35  | 2.55  | up   | 4.22  | 2.87  | Inc-FRY-1 furry homolc  | Inc-FRY-1:1 NONHSAT0: chr13    | 32297335  | 32299122  | + |
| TC1300000211.oe.1 | -2.28 | -1.19 | 2.28  | down | 3.33  | 4.52  | Inc-RFC3-4 LNCipedia    | lc Inc-RFC3-4: NONHSAT0: chr13 | 33772098  | 33787164  | + |
| TC1300000447.oe.1 | -2.13 | -1.09 | 2.13  | down | 3.09  | 4.18  | Inc-OLFM4- NONCODE      | c Inc-OLFM4- NONHSAT0: chr13   | 53760721  | 53774984  | + |
| TC1300000680.oe.1 | 2.17  | 1.12  | 2.17  | up   | 4.03  | 2.91  | Inc-GPR180- LNCipedia   | lc Inc-GPR180- NONHSAT0: chr13 | 94649048  | 94649586  | + |
| TC1300000783.oe.1 | 2.65  | 1.41  | 2.65  | up   | 5.47  | 4.06  | XLOC_01048 long interge | Inc-DAOA-4 NONHSAT0: chr13     | 106376563 | 106378595 | + |
| TC1300001078.oe.1 | 2.21  | 1.14  | 2.21  | up   | 3.65  | 2.51  | LINC00423// LNCipedia   | lc Inc-STARD1: NONHSAT1: chr13 | 32809190  | 32911652  | - |
| TC1300001179.oe.1 | -3.08 | -1.62 | 3.08  | down | 9.14  | 10.77 | RP11-5G9.6 N/A          | --- chr13                      | 43894725  | 43895182  | - |
| TC1300001250.oe.1 | -2.19 | -1.13 | 2.19  | down | 2.88  | 4.01  | Inc-AL13621 LNCipedia   | lc Inc-AL13621 NONHSAT0: chr13 | 49533918  | 49539503  | - |
| TC1300001322.oe.1 | -3.02 | -1.59 | 3.02  | down | 2.72  | 4.31  | Inc-DIAPH3- LNCipedia   | lc Inc-DIAPH3- --- chr13       | 58559074  | 58563053  | - |
| TC1300001410.oe.1 | -2.03 | -1.02 | 2.03  | down | 3.41  | 4.43  | LINC01034// NONCODE     | c Inc-COMME NONHSAT0: chr13    | 76013023  | 76014501  | - |
| TC1300001436.oe.1 | -2.16 | -1.11 | 2.16  | down | 3.08  | 4.19  | Inc-POU4F1 LNCipedia    | lc Inc-POU4F1 NONHSAT0: chr13  | 78631381  | 78632921  | - |
| TC1300001441.oe.1 | -2.15 | -1.11 | 2.15  | down | 3.62  | 4.73  | Inc-RNF219- LNCipedia   | lc Inc-RNF219- --- chr13       | 79316220  | 79350237  | - |
| TC1300001471.oe.1 | -2.64 | -1.40 | 2.64  | down | 2.97  | 4.37  | Inc-SLITRK6- LNCipedia  | lc Inc-SLITRK6- --- chr13      | 88012847  | 88034890  | - |
| TC1300001503.oe.1 | 2.24  | 1.17  | 2.24  | up   | 4.02  | 2.85  | Inc-DCT-1 LNCipedia     | lc Inc-DCT-1:1 NONHSAT0: chr13 | 94488893  | 94491018  | - |
| TC13000107.hg.4   | 2.65  | 1.40  | 2.65  | up   | 7.26  | 5.85  | EEF1DP3 eukaryotic tr   | --- chr13                      | 31846783  | 31959584  | + |
| TC1400000032.oe.1 | 2.07  | 1.05  | 2.07  | up   | 10.41 | 9.36  | Inc-APEX1-3 LNCipedia   | lc Inc-APEX1-3 NONHSAT0: chr14 | 20476489  | 20477087  | + |
| TC1400000036.oe.1 | 2.20  | 1.14  | 2.20  | up   | 4.79  | 3.65  | Inc-EDDM3/ LNCipedia    | lc Inc-EDDM3/ NONHSAT0: chr14  | 20721196  | 20735853  | + |
| TC1400000081.oe.1 | 2.08  | 1.05  | 2.08  | up   | 7.65  | 6.59  | Inc-AE00066 LNCipedia   | lc Inc-AE00066 NONHSAT0: chr14 | 22611541  | 22612358  | + |
| TC1400000157.oe.1 | -2.53 | -1.34 | 2.53  | down | 3.67  | 5.01  | Inc-FOXG1- LNCipedia    | lc Inc-FOXG1- --- chr14        | 27833680  | 27833946  | + |
| TC1400000203.oe.1 | -3.13 | -1.65 | 3.13  | down | 9.52  | 11.17 | Inc-RP11-18 LNCipedia   | lc Inc-RP11-18 NONHSAT0: chr14 | 32154010  | 32157216  | + |
| TC1400000247.oe.1 | -2.00 | -1.00 | 2.00  | down | 3.56  | 4.56  | Inc-BRMS1L LNCipedia    | lc Inc-BRMS1L NONHSAT0: chr14  | 35948352  | 35949143  | + |
| TC1400000324.oe.1 | 2.11  | 1.08  | 2.11  | up   | 5.09  | 4.01  | Inc-PRPF39- LNCipedia   | lc Inc-PRPF39- NONHSAT0: chr14 | 45136514  | 45137959  | + |
| TC1400000353.oe.1 | -2.53 | -1.34 | 2.53  | down | 9.29  | 10.63 | Inc-ARF6-3 LNCipedia    | lc Inc-ARF6-3: NONHSAT0: chr14 | 49894417  | 49897054  | + |
| TC1400000482.oe.1 | -3.94 | -1.98 | 3.94  | down | 3.86  | 5.84  | Inc-TOMM2/ LNCipedia    | lc Inc-TOMM2 NONHSAT0: chr14   | 58351297  | 58359172  | + |
| TC1400000483.oe.1 | -2.16 | -1.11 | 2.16  | down | 4.85  | 5.96  | Inc-TOMM2 LNCipedia     | lc Inc-TOMM2 NONHSAT0: chr14   | 58365475  | 58371960  | + |
| TC1400000540.oe.1 | 2.35  | 1.23  | 2.35  | up   | 4.38  | 3.14  | Inc-SYNE2-5 LNCipedia   | lc Inc-SYNE2-5 --- chr14       | 63580381  | 63580719  | + |
| TC1400000558.oe.1 | -2.17 | -1.12 | 2.17  | down | 5.70  | 6.81  | Inc-FNTB-2 LNCipedia    | lc Inc-FNTB-2: NONHSAT0: chr14 | 64933813  | 64935368  | + |
| TC1400000576.oe.1 | -2.33 | -1.22 | 2.33  | down | 3.21  | 4.43  | Inc-MPP5-1 NONCODE      | c Inc-MPP5-1 NONHSAT0: chr14   | 67227471  | 67228544  | + |
| TC1400000664.oe.1 | 2.01  | 1.01  | 2.01  | up   | 6.64  | 5.63  | Inc-ACOT1- LNCipedia    | lc Inc-ACOT1- --- chr14        | 73490964  | 73493392  | + |
| TC1400000717.oe.1 | -2.07 | -1.05 | 2.07  | down | 5.38  | 6.43  | Inc-ESRRB-3 LNCipedia   | lc Inc-ESRRB-3 NONHSAT0: chr14 | 76196438  | 76199542  | + |
| TC1400000765.oe.1 | -2.27 | -1.18 | 2.27  | down | 2.57  | 3.75  | Inc-RP11-49 LNCipedia   | lc Inc-RP11-49 --- chr14       | 85140628  | 85197861  | + |
| TC1400000771.oe.1 | -2.61 | -1.38 | 2.61  | down | 4.73  | 6.12  | Inc-RP11-49 NONCODE     | c Inc-RP11-49 NONHSAT0: chr14  | 85623690  | 85626228  | + |
| TC1400000831.oe.1 | 2.03  | 1.02  | 2.03  | up   | 4.92  | 3.90  | Inc-CTD-25/ NONCODE     | c Inc-CTD-25/ NONHSAT0: chr14  | 91419449  | 91419751  | + |
| TC1400000835.oe.1 | -2.06 | -1.04 | 2.06  | down | 2.68  | 3.72  | Inc-SLC24A4 LNCipedia   | lc Inc-SLC24A4 --- chr14       | 92137206  | 92141887  | + |
| TC1400000895.oe.1 | -2.18 | -1.12 | 2.18  | down | 8.15  | 9.27  | Inc-AK7-3 LNCipedia     | lc Inc-AK7-3:1 NONHSAT0: chr14 | 96534223  | 96537059  | + |
| TC1400001066.oe.1 | 2.68  | 1.42  | 2.68  | up   | 7.31  | 5.89  | Inc-BTBD6-2 NONCODE     | c Inc-BTBD6-2 NONHSAT0: chr14  | 105250677 | 105251099 | + |
| TC1400001069.oe.1 | -2.16 | -1.11 | 2.16  | down | 3.03  | 4.15  | Inc-TEX22-3 LNCipedia   | lc Inc-TEX22-3 NONHSAT0: chr14 | 105374618 | 105374971 | + |
| TC1400001166.oe.1 | 2.03  | 1.02  | 2.03  | up   | 6.11  | 5.09  | Inc-CDH24- NONCODE      | c Inc-CDH24- NONHSAT0: chr14   | 23061572  | 23062770  | - |

|                   |       |       |      |      |       |       |                       |                                 |           |           |   |
|-------------------|-------|-------|------|------|-------|-------|-----------------------|---------------------------------|-----------|-----------|---|
| TC1400001308.oe.1 | -3.49 | -1.80 | 3.49 | down | 4.30  | 6.10  | Inc-NFKBIA- LNCipedia | lc Inc-NFKBIA- NONHSAT0: chr14  | 35549174  | 35572860  | - |
| TC1400001368.oe.1 | 2.07  | 1.05  | 2.07 | up   | 9.61  | 8.56  | Inc-KLHL28- LNCipedia | lc Inc-KLHL28- NONHSAT0: chr14  | 44887434  | 44887741  | - |
| TC1400001442.oe.1 | -2.21 | -1.15 | 2.21 | down | 3.71  | 4.85  | Inc-NID2-5 LNCipedia  | lc Inc-NID2-5: NONHSAT0: chr14  | 51998175  | 51999916  | - |
| TC1400001623.oe.1 | 2.29  | 1.20  | 2.29 | up   | 6.70  | 5.51  | Inc-VTI1B-2 LNCipedia | lc Inc-VTI1B-2 NONHSAT0: chr14  | 67589755  | 67592776  | - |
| TC1400001702.oe.1 | 2.16  | 1.11  | 2.16 | up   | 5.24  | 4.12  | Inc-HEATR4 LNCipedia  | lc Inc-HEATR4 NONHSAT0: chr14   | 73568238  | 73569833  | - |
| TC1400001897.oe.1 | -2.25 | -1.17 | 2.25 | down | 8.50  | 9.67  | Inc-CATSPEI LNCipedia | lc Inc-CATSPEI NONHSAT0: chr14  | 91812016  | 91813828  | - |
| TC1400002000.oe.1 | 2.07  | 1.05  | 2.07 | up   | 7.82  | 6.77  | Inc-SLC25A2 NONCODE   | cl Inc-SLC25A2 NONHSAT0: chr14  | 100361703 | 100375547 | - |
| TC14001019.hg.4   | 2.16  | 1.11  | 2.16 | up   | 8.72  | 7.61  | ARHGAP5-A ARHGAP5     | ar --- --- chr14                | 32075419  | 32076793  | - |
| TC14002287.hg.4   | -2.05 | -1.03 | 2.05 | down | 4.64  | 5.68  | ECRP                  | ribonuclease --- --- chr14      | 20919341  | 20920299  | + |
| TC1500000102.oe.1 | -2.26 | -1.18 | 2.26 | down | 4.38  | 5.56  | Inc-GOLGA8 LNCipedia  | lc Inc-GOLGA8 --- chr15         | 28604592  | 28607342  | + |
| TC1500000176.oe.1 | -2.04 | -1.03 | 2.04 | down | 3.77  | 4.80  | Inc-C15orf5 LNCipedia | lc Inc-C15orf5: NONHSAT0: chr15 | 34336408  | 34340368  | + |
| TC1500000232.oe.1 | 2.32  | 1.22  | 2.32 | up   | 6.89  | 5.67  | Inc-C15orf5 NONCODE   | cl Inc-C15orf5: NONHSAT0: chr15 | 39585635  | 39588616  | + |
| TC1500000233.oe.1 | 4.03  | 2.01  | 4.03 | up   | 7.37  | 5.36  | Inc-C15orf5 NONCODE   | cl Inc-C15orf5: NONHSAT0: chr15 | 39588848  | 39589843  | + |
| TC1500000234.oe.1 | 2.97  | 1.57  | 2.97 | up   | 10.24 | 8.67  | Inc-C15orf5 NONCODE   | cl Inc-C15orf5: NONHSAT0: chr15 | 39590928  | 39591618  | + |
| TC1500000235.oe.1 | 2.98  | 1.57  | 2.98 | up   | 13.87 | 12.30 | Inc-EIF2AK4 LNCipedia | lc Inc-EIF2AK4 NONHSAT0: chr15  | 39594068  | 39595551  | + |
| TC1500000236.oe.1 | 3.91  | 1.97  | 3.91 | up   | 10.86 | 8.89  | Inc-EIF2AK4 LNCipedia | lc Inc-EIF2AK4 --- chr15        | 39595680  | 39597832  | + |
| TC1500000273.oe.1 | -2.34 | -1.23 | 2.34 | down | 3.28  | 4.51  | Inc-RAD51- NONCODE    | cl Inc-RAD51-: NONHSAT0: chr15  | 40662573  | 40663904  | + |
| TC1500000279.oe.1 | 2.70  | 1.43  | 2.70 | up   | 5.84  | 4.41  | Inc-VPS18-4 NONCODE   | cl Inc-VPS18-4 NONHSAT0: chr15  | 40854378  | 40856899  | + |
| TC1500000347.oe.1 | -2.03 | -1.02 | 2.03 | down | 9.44  | 10.46 | Inc-EIF3J-1 LNCipedia | lc Inc-EIF3J-1: NONHSAT0: chr15 | 44519224  | 44525947  | + |
| TC1500000379.oe.1 | -2.08 | -1.06 | 2.08 | down | 3.15  | 4.21  | OTTHUMG0 LNCipedia    | lc Inc-SLC24A5 NONHSAT0: chr15  | 47274183  | 47275164  | + |
| TC1500000436.oe.1 | -2.96 | -1.57 | 2.96 | down | 4.95  | 6.52  | RP11-56B16 N/A        | --- --- chr15                   | 51833134  | 51833426  | + |
| TC1500000451.oe.1 | -2.01 | -1.01 | 2.01 | down | 3.74  | 4.75  | Inc-MAPK6- LNCipedia  | lc Inc-MAPK6- NONHSAT0: chr15   | 52577842  | 52598709  | + |
| TC1500000472.oe.1 | -2.06 | -1.04 | 2.06 | down | 2.88  | 3.92  | RP11-420M LNCipedia   | lc Inc-RP11-17 NONHSAT0: chr15  | 55680385  | 55681463  | + |
| TC1500000494.oe.1 | 2.01  | 1.00  | 2.01 | up   | 3.69  | 2.69  | OTTHUMG0 NONCODE      | cl Inc-GCOM1 NONHSAT0: chr15    | 57720295  | 57720928  | + |
| TC1500000514.oe.1 | -2.36 | -1.24 | 2.36 | down | 5.80  | 7.04  | Inc-RNF111 LNCipedia  | lc Inc-RNF111 NONHSAT0: chr15   | 58855827  | 58857551  | + |
| TC1500000576.oe.1 | -2.30 | -1.20 | 2.30 | down | 3.30  | 4.50  | Inc-FBXL22- LNCipedia | lc Inc-FBXL22- --- chr15        | 63676880  | 63677241  | + |
| TC1500000606.oe.1 | -2.51 | -1.33 | 2.51 | down | 4.63  | 5.95  | Inc-RAB11A LNCipedia  | lc Inc-RAB11A NONHSAT0: chr15   | 65890771  | 65891991  | + |
| TC1500000705.oe.1 | 2.13  | 1.09  | 2.13 | up   | 10.84 | 9.75  | Inc-C15orf6 LNCipedia | lc Inc-C15orf6 NONHSAT0: chr15  | 73709565  | 73714514  | + |
| TC1500000841.oe.1 | 3.25  | 1.70  | 3.25 | up   | 6.79  | 5.09  | Inc-MESDC1 LNCipedia  | lc Inc-MESDC1 NONHSAT0: chr15   | 80946944  | 80949162  | + |
| TC1500000894.oe.1 | -2.48 | -1.31 | 2.48 | down | 2.80  | 4.10  | Inc-ZSCAN2 NONCODE    | cl Inc-ZSCAN2 NONHSAT0: chr15   | 84661754  | 84662191  | + |
| TC1500001415.oe.1 | 3.37  | 1.75  | 3.37 | up   | 10.15 | 8.40  | Inc-SPTBN5 LNCipedia  | lc Inc-SPTBN5 NONHSAT0: chr15   | 41899432  | 41900010  | - |
| TC1500001431.oe.1 | -2.43 | -1.28 | 2.43 | down | 10.62 | 11.90 | Inc-EPB42-4 LNCipedia | lc Inc-EPB42-4 NONHSAT0: chr15  | 43015796  | 43036264  | - |
| TC1500001474.oe.1 | 2.14  | 1.10  | 2.14 | up   | 5.15  | 4.05  | RP11-109D2 LNCipedia  | lc Inc-DUOX2- NONHSAT0: chr15   | 45073492  | 45074048  | - |
| TC1500001539.oe.1 | -2.34 | -1.23 | 2.34 | down | 7.49  | 8.71  | Inc-USP50-4 NONCODE   | cl Inc-USP50-4 NONHSAT0: chr15  | 50574959  | 50586582  | - |
| TC1500001553.oe.1 | -2.90 | -1.54 | 2.90 | down | 6.28  | 7.82  | Inc-CYP19A NONCODE    | cl Inc-CYP19A: NONHSAT0: chr15  | 51453248  | 51458878  | - |
| TC1500001573.oe.1 | -2.09 | -1.06 | 2.09 | down | 3.18  | 4.24  | RP11-519C1 LNCipedia  | lc Inc-ARPP19: NONHSAT0: chr15  | 52648634  | 52649866  | - |
| TC1500001575.oe.1 | -2.17 | -1.11 | 2.17 | down | 9.42  | 10.53 | Inc-ONECU1 LNCipedia  | lc Inc-ONECU1 NONHSAT0: chr15   | 52757315  | 52791076  | - |
| TC1500001682.oe.1 | -3.23 | -1.69 | 3.23 | down | 5.35  | 7.04  | Inc-C2CD4B NONCODE    | cl Inc-C2CD4B NONHSAT0: chr15   | 61951860  | 61961671  | - |
| TC1500001813.oe.1 | 2.11  | 1.08  | 2.11 | up   | 5.80  | 4.72  | Inc-UACA-6 NONCODE    | cl Inc-UACA-6 NONHSAT0: chr15   | 70048977  | 70058815  | - |
| TC1500001823.oe.1 | -3.06 | -1.61 | 3.06 | down | 6.41  | 8.02  | Inc-LARP6-4 NONCODE   | cl Inc-LARP6-4 NONHSAT0: chr15  | 70678099  | 70680034  | - |
| TC1500001839.oe.1 | -3.49 | -1.80 | 3.49 | down | 3.60  | 5.40  | Inc-GRAMD LNCipedia   | lc Inc-GRAMD: NONHSAT0: chr15   | 71883701  | 71888607  | - |
| TC1500001841.oe.1 | -2.21 | -1.14 | 2.21 | down | 4.87  | 6.02  | Inc-GRAMD NONCODE     | cl Inc-GRAMD: NONHSAT0: chr15   | 71935140  | 71960403  | - |
| TC1500001879.oe.1 | 2.61  | 1.38  | 2.61 | up   | 8.86  | 7.48  | Inc-RP11-24 LNCipedia | lc Inc-RP11-24 NONHSAT0: chr15  | 74182227  | 74182878  | - |
| TC1500001969.oe.1 | -2.05 | -1.03 | 2.05 | down | 3.99  | 5.02  | Inc-ACSBG1 LNCipedia  | lc Inc-ACSBG1 NONHSAT0: chr15   | 78290527  | 78291221  | - |
| TC1500002060.oe.1 | 2.32  | 1.21  | 2.32 | up   | 8.80  | 7.59  | Inc-SEC11A LNCipedia  | lc Inc-SEC11A NONHSAT0: chr15   | 85204032  | 85204330  | - |
| TC1500002104.oe.1 | 2.28  | 1.19  | 2.28 | up   | 13.60 | 12.40 | Inc-HAPLN3 NONCODE    | cl Inc-HAPLN3 NONHSAT0: chr15   | 88905382  | 88906716  | - |
| TC1600000149.oe.1 | 3.78  | 1.92  | 3.78 | up   | 10.75 | 8.83  | Inc-TNFRSF1 NONCODE   | cl Inc-TNFRSF1 NONHSAT1: chr16  | 3020390   | 3022383   | + |
| TC1600000197.oe.1 | 2.34  | 1.23  | 2.34 | up   | 7.05  | 5.83  | Inc-ALG1-2 NONCODE    | cl Inc-ALG1-2: NONHSAT1: chr16  | 5085071   | 5087379   | + |
| TC1600000400.oe.1 | -2.72 | -1.44 | 2.72 | down | 4.18  | 5.62  | Inc-AC0043 LNCipedia  | lc Inc-AC0043: NONHSAT1: chr16  | 20783264  | 20786152  | + |

|                   |       |       |      |      |       |       |                                                     |          |            |
|-------------------|-------|-------|------|------|-------|-------|-----------------------------------------------------|----------|------------|
| TC1600000401.oe.1 | -2.11 | -1.08 | 2.11 | down | 4.08  | 5.15  | Inc-AC0043{NONCODE cInc-AC0043{NONHSAT1 chr16       | 20796078 | 20797156 + |
| TC1600000408.oe.1 | -2.69 | -1.43 | 2.69 | down | 3.97  | 5.40  | Inc-ANKS4B NONCODE cInc-ANKS4B NONHSAT1 chr16       | 21304270 | 21306591 + |
| TC1600000491.oe.1 | 2.08  | 1.06  | 2.08 | up   | 5.15  | 4.09  | Inc-KIAA055 LNCipedia lcInc-KIAA055 NONHSAT1 chr16  | 27550133 | 27574295 + |
| TC1600000609.oe.1 | 2.70  | 1.43  | 2.70 | up   | 8.44  | 7.00  | Inc-BCKDK-; LNCipedia lcInc-BCKDK-; --- chr16       | 31103629 | 31103977 + |
| TC1600000622.oe.1 | 2.82  | 1.49  | 2.82 | up   | 4.82  | 3.32  | Inc-ITGAD-2 LNCipedia lcInc-ITGAD-2 NONHSAT1 chr16  | 31371474 | 31372654 + |
| TC1600000831.oe.1 | -2.76 | -1.46 | 2.76 | down | 6.31  | 7.77  | Inc-RBL2-4 NONCODE cInc-RBL2-4; NONHSAT1 chr16      | 53208032 | 53226403 + |
| TC1600000875.oe.1 | 2.16  | 1.11  | 2.16 | up   | 4.33  | 3.22  | RP11-413H2 NONCODE cInc-OGFOD; NONHSAT1 chr16       | 56409320 | 56411683 + |
| TC1600000886.oe.1 | 2.21  | 1.14  | 2.21 | up   | 5.91  | 4.76  | Inc-NUP93-; LNCipedia lcInc-NUP93-; NONHSAT1 chr16  | 56841641 | 56846880 + |
| TC1600001006.oe.1 | -2.25 | -1.17 | 2.25 | down | 2.89  | 4.06  | Inc-PLEKHG; NONCODE cInc-PLEKHG; NONHSAT1 chr16     | 67326980 | 67347591 + |
| TC1600001209.oe.1 | -2.18 | -1.13 | 2.18 | down | 4.65  | 5.78  | RP11-358L2 N/A --- --- chr16                        | 78123243 | 78124332 + |
| TC1600001236.oe.1 | -2.03 | -1.02 | 2.03 | down | 3.35  | 4.37  | CTD-2055G; NONCODE cInc-DYNLRB NONHSAT1 chr16       | 80736360 | 80742305 + |
| TC1600001350.oe.1 | 2.02  | 1.02  | 2.02 | up   | 7.90  | 6.89  | Inc-JPH3-7 LNCipedia lcInc-JPH3-7; NONHSAT1 chr16   | 87392423 | 87399504 + |
| TC1600001410.oe.1 | 2.21  | 1.14  | 2.21 | up   | 8.36  | 7.21  | Inc-RPL13-4 NONCODE cInc-RPL13-4 NONHSAT1 chr16     | 89579346 | 89581530 + |
| TC1600001738.oe.1 | 2.02  | 1.02  | 2.02 | up   | 3.69  | 2.68  | Inc-PARN-1 LNCipedia lcInc-PARN-1 --- chr16         | 14270610 | 14277767 - |
| TC1600001797.oe.1 | 2.03  | 1.02  | 2.03 | up   | 8.48  | 7.46  | Inc-ARL6IP1 LNCipedia lcInc-ARL6IP1 NONHSAT1 chr16  | 18788544 | 18790340 - |
| TC1600001801.oe.1 | -3.13 | -1.65 | 3.13 | down | 4.60  | 6.25  | Inc-ARL6IP1 LNCipedia lcInc-ARL6IP1 NONHSAT1 chr16  | 18856338 | 18861487 - |
| TC1600001836.oe.1 | -2.11 | -1.08 | 2.11 | down | 9.05  | 10.13 | Inc-CRYM-3 LNCipedia lcInc-CRYM-3 NONHSAT1 chr16    | 21432024 | 21434455 - |
| TC1600001856.oe.1 | -2.67 | -1.42 | 2.67 | down | 4.59  | 6.00  | Inc-COG7-2 NONCODE cInc-COG7-2 NONHSAT1 chr16       | 23061406 | 23064173 - |
| TC1600002117.oe.1 | 5.20  | 2.38  | 5.20 | up   | 6.62  | 4.24  | Inc-ABCC11 LNCipedia lcInc-ABCC11 NONHSAT1 chr16    | 48084055 | 48086640 - |
| TC1600002118.oe.1 | 2.79  | 1.48  | 2.79 | up   | 5.56  | 4.08  | Inc-ABCC11 NONCODE cInc-ABCC11 NONHSAT1 chr16       | 48087166 | 48091238 - |
| TC1600002409.oe.1 | -2.10 | -1.07 | 2.10 | down | 3.16  | 4.24  | Inc-ZNF19-2 LNCipedia lcInc-ZNF19-2 NONHSAT1 chr16  | 71456782 | 71462392 - |
| TC1600002417.oe.1 | 2.32  | 1.21  | 2.32 | up   | 6.59  | 5.38  | Inc-ZNF821- NONCODE cInc-ZNF821- NONHSAT1 chr16     | 71789323 | 71809084 - |
| TC1600002451.oe.1 | -2.40 | -1.27 | 2.40 | down | 6.45  | 7.72  | Inc-CLEC18E NONCODE cInc-CLEC18E NONHSAT1 chr16     | 74377490 | 74377819 - |
| TC1600002488.oe.1 | -3.13 | -1.65 | 3.13 | down | 2.58  | 4.23  | Inc-ADAMT; LNCipedia lcInc-ADAMT; NONHSAT1 chr16    | 76994308 | 77008307 - |
| TC1600002565.oe.1 | 2.05  | 1.03  | 2.05 | up   | 4.14  | 3.10  | Inc-COTL1-2 LNCipedia lcInc-COTL1-; --- chr16       | 84778324 | 84784278 - |
| TC1600002582.oe.1 | 2.05  | 1.03  | 2.05 | up   | 5.69  | 4.65  | Inc-C16orf7- NONCODE cInc-C16orf7- NONHSAT1 chr16   | 85779398 | 85781223 - |
| TC16000229.hg.4   | -2.15 | -1.10 | 2.15 | down | 7.96  | 9.07  | CRYM-AS1 CRYM antise --- --- chr16                  | 21300849 | 21318591 + |
| TC1700000002.oe.1 | 2.22  | 1.15  | 2.22 | up   | 6.03  | 4.88  | Inc-C17orf9- NONCODE cInc-C17orf9- NONHSAT1 chr17   | 206418   | 206810 +   |
| TC1700000063.oe.1 | -2.44 | -1.29 | 2.44 | down | 5.80  | 7.09  | RP11-135N; N/A --- --- chr17                        | 2639297  | 2642418 +  |
| TC1700000104.oe.1 | 2.38  | 1.25  | 2.38 | up   | 10.26 | 9.01  | Inc-RNF167- NONCODE cInc-RNF167- NONHSAT1 chr17     | 4940046  | 4940836 +  |
| TC1700000162.oe.1 | 2.29  | 1.20  | 2.29 | up   | 8.78  | 7.58  | Inc-SLC35G; NONCODE cInc-SLC35G; NONHSAT1 chr17     | 7502085  | 7502724 +  |
| TC1700000166.oe.1 | 2.07  | 1.05  | 2.07 | up   | 10.13 | 9.08  | OTTHUMG0; small nucleo Inc-SEN3-1 NONHSAT1 chr17    | 7572706  | 7582024 +  |
| TC1700000331.oe.1 | 2.15  | 1.10  | 2.15 | up   | 7.40  | 6.30  | Inc-MYO15- NONCODE cInc-MYO15- NONHSAT1 chr17       | 18087961 | 18099221 + |
| TC1700000395.oe.1 | -2.34 | -1.23 | 2.34 | down | 7.15  | 8.37  | Inc-AC1159; LNCipedia lcInc-AC1159; NONHSAT1 chr17  | 19672352 | 19677595 + |
| TC1700000428.oe.1 | 2.14  | 1.09  | 2.14 | up   | 6.86  | 5.76  | Inc-KCNJ12- NONCODE cInc-KCNJ12- NONHSAT0; chr17    | 21284710 | 21314227 + |
| TC1700000470.oe.1 | 2.71  | 1.44  | 2.71 | up   | 5.39  | 3.95  | Inc-KSR1-1 NONCODE cInc-KSR1-1; NONHSAT0; chr17     | 27623535 | 27626435 + |
| TC1700000525.oe.1 | -3.39 | -1.76 | 3.39 | down | 8.07  | 9.83  | Inc-TAOK1-; LNCipedia lcInc-TAOK1-; --- chr17       | 29544715 | 29545717 + |
| TC1700000526.oe.1 | -2.98 | -1.58 | 2.98 | down | 8.46  | 10.04 | Inc-TAOK1-; NONCODE lInc-TAOK1-; NONHSAT0; chr17    | 29546887 | 29552359 + |
| TC1700000542.oe.1 | -2.24 | -1.16 | 2.24 | down | 11.52 | 12.68 | Inc-GOSR1- NONCODE cInc-GOSR1- NONHSAT0; chr17      | 30438985 | 30444144 + |
| TC1700000630.oe.1 | -2.10 | -1.07 | 2.10 | down | 11.37 | 12.44 | Inc-CCL2-9 LNCipedia lcInc-CCL2-9; --- chr17        | 34083580 | 34083847 + |
| TC1700000822.oe.1 | 2.21  | 1.14  | 2.21 | up   | 14.98 | 13.84 | Inc-AOC2-1 LNCipedia lcInc-AOC2-1 NONHSAT0; chr17   | 42833418 | 42834804 + |
| TC1700000937.oe.1 | 2.12  | 1.08  | 2.12 | up   | 6.45  | 5.36  | Inc-RP11-2; LNCipedia lcInc-RP11-2; NONHSAT0; chr17 | 47369616 | 47374638 + |
| TC1700000956.oe.1 | -2.36 | -1.24 | 2.36 | down | 3.35  | 4.59  | Inc-SNX11-; LNCipedia lcInc-SNX11-; --- chr17       | 48148329 | 48149933 + |
| TC1700000981.oe.1 | 2.24  | 1.16  | 2.24 | up   | 8.11  | 6.95  | Inc-B4GALN LNCipedia lcInc-B4GALN NONHSAT0; chr17   | 49051815 | 49055155 + |
| TC1700001005.oe.1 | 2.41  | 1.27  | 2.41 | up   | 10.01 | 8.74  | Inc-PDK2-2 NONCODE cInc-PDK2-2; NONHSAT0; chr17     | 50077400 | 50079016 + |
| TC1700001034.oe.1 | -2.23 | -1.16 | 2.23 | down | 11.32 | 12.48 | Inc-ABCC3-; NONCODE cInc-ABCC3-; NONHSAT0; chr17    | 50736635 | 50741247 + |
| TC1700001035.oe.1 | -2.43 | -1.28 | 2.43 | down | 12.41 | 13.69 | Inc-ABCC3-; NONCODE cInc-ABCC3-; NONHSAT0; chr17    | 50743672 | 50745858 + |
| TC1700001038.oe.1 | -2.04 | -1.03 | 2.04 | down | 4.07  | 5.10  | Inc-ABCC3-; LNCipedia lcInc-ABCC3-; NONHSAT0; chr17 | 50753056 | 50756213 + |
| TC1700001061.oe.1 | -2.22 | -1.15 | 2.22 | down | 5.35  | 6.51  | Inc-TOM1L1 LNCipedia lcInc-TOM1L1 --- chr17         | 54763265 | 54763520 + |

|                   |       |       |      |      |       |       |                            |                                 |          |          |   |
|-------------------|-------|-------|------|------|-------|-------|----------------------------|---------------------------------|----------|----------|---|
| TC1700001170.oe.1 | 3.77  | 1.92  | 3.77 | up   | 10.95 | 9.04  | Inc-C17orf8; LNCipedia     | lc Inc-C17orf8; NONHSAT0! chr17 | 61401773 | 61403163 | + |
| TC1700001227.oe.1 | 2.45  | 1.29  | 2.45 | up   | 6.31  | 5.02  | Inc-AC0374; LNCipedia      | lc Inc-AC0374; NONHSAT0! chr17  | 64814985 | 64822052 | + |
| TC1700001258.oe.1 | 2.01  | 1.01  | 2.01 | up   | 10.93 | 9.92  | Inc-NOL11-; NONCODE        | cl Inc-NOL11-; NONHSAT0! chr17  | 67532905 | 67632421 | + |
| TC1700001282.oe.1 | -2.17 | -1.12 | 2.17 | down | 5.49  | 6.60  | Inc-AMZ2-2 LNCipedia       | lc Inc-AMZ2-2 NONHSAT0! chr17   | 68267029 | 68267396 | + |
| TC1700001334.oe.1 | 2.73  | 1.45  | 2.73 | up   | 7.85  | 6.40  | Inc-DNAI2-2 LNCipedia      | lc Inc-DNAI2-2; NONHSAT0! chr17 | 74249365 | 74250730 | + |
| TC1700001448.oe.1 | 2.06  | 1.04  | 2.06 | up   | 7.41  | 6.37  | Inc-C1QTNF NONCODE         | cl Inc-C1QTNF NONHSAT0! chr17   | 78855478 | 78855844 | + |
| TC1700001515.oe.1 | 2.01  | 1.00  | 2.01 | up   | 7.95  | 6.94  | Inc-HGS-1 LNCipedia        | lc Inc-HGS-1;1 NONHSAT0! chr17  | 81703501 | 81704420 | + |
| TC1700001520.oe.1 | 2.09  | 1.06  | 2.09 | up   | 9.84  | 8.78  | NONHSAG0 NONCODE           | cl Inc-GCGR-1 NONHSAT0! chr17   | 81843165 | 81843958 | + |
| TC1700001546.oe.1 | 2.44  | 1.29  | 2.44 | up   | 9.45  | 8.16  | Inc-TEX19-1 LNCipedia      | lc Inc-TEX19-1 NONHSAT0! chr17  | 82236474 | 82237416 | + |
| TC1700001562.oe.1 | 2.49  | 1.31  | 2.49 | up   | 11.79 | 10.48 | Inc-NARF-5 LNCipedia       | lc Inc-NARF-5; NONHSAT0! chr17  | 82582775 | 82586043 | + |
| TC1700001692.oe.1 | 2.12  | 1.09  | 2.12 | up   | 10.46 | 9.37  | Inc-ANKFY1 LNCipedia       | lc Inc-ANKFY1 NONHSAT1! chr17   | 4064799  | 4072827  | - |
| TC1700001703.oe.1 | 2.51  | 1.33  | 2.51 | up   | 7.72  | 6.39  | Inc-GGT6-2 NONCODE         | cl Inc-GGT6-2; NONHSAT1! chr17  | 4539439  | 4542100  | - |
| TC1700001704.oe.1 | 2.58  | 1.37  | 2.58 | up   | 7.57  | 6.21  | Inc-GGT6-1 LNCipedia       | lc Inc-GGT6-1; NONHSAT1! chr17  | 4552183  | 4555358  | - |
| TC1700001757.oe.1 | -2.19 | -1.13 | 2.19 | down | 3.34  | 4.47  | Inc-AC0277; LNCipedia      | lc Inc-AC0277; NONHSAT1! chr17  | 6980856  | 6981165  | - |
| TC1700001782.oe.1 | 3.46  | 1.79  | 3.46 | up   | 6.13  | 4.34  | Inc-SOX15-; NONCODE        | cl Inc-SOX15-; NONHSAT1! chr17  | 7591442  | 7592357  | - |
| TC1700001808.oe.1 | 2.15  | 1.11  | 2.15 | up   | 6.44  | 5.33  | Inc-AURKB-; NONCODE        | cl Inc-AURKB-; NONHSAT1! chr17  | 8230268  | 8230933  | - |
| TC1700002011.oe.1 | -2.38 | -1.25 | 2.38 | down | 3.89  | 5.15  | Inc-SLC47A2 LNCipedia      | lc Inc-SLC47A2 NONHSAT1! chr17  | 19639128 | 19640550 | - |
| TC1700002215.oe.1 | -2.07 | -1.05 | 2.07 | down | 4.16  | 5.21  | Inc-ACCN1- LNCipedia       | lc Inc-ACCN1- NONHSAT0! chr17   | 34219118 | 34251909 | - |
| TC1700002225.oe.1 | 2.04  | 1.03  | 2.04 | up   | 4.30  | 3.27  | RP5-837J1.4 LNCipedia      | lc Inc-RAD51D NONHSAT0! chr17   | 35073831 | 35074374 | - |
| TC1700002303.oe.1 | -2.16 | -1.11 | 2.16 | down | 3.65  | 4.77  | Inc-SRCIN1- LNCipedia      | lc Inc-SRCIN1- NONHSAT0! chr17  | 38636682 | 38637016 | - |
| TC1700002464.oe.1 | 2.04  | 1.03  | 2.04 | up   | 8.99  | 7.96  | Inc-SLC25A3 LNCipedia      | lc Inc-SLC25A3 NONHSAT0! chr17  | 44319614 | 44319996 | - |
| TC1700002483.oe.1 | -2.17 | -1.12 | 2.17 | down | 2.94  | 4.06  | Inc-DCAKD- LNCipedia       | lc Inc-DCAKD- --- chr17         | 45004464 | 45004665 | - |
| TC1700002515.oe.1 | -2.53 | -1.34 | 2.53 | down | 6.97  | 8.31  | Inc-KIAA126 LNCipedia      | lc Inc-KIAA126 --- chr17        | 45941539 | 45941745 | - |
| TC1700002622.oe.1 | -2.64 | -1.40 | 2.64 | down | 7.32  | 8.72  | Inc-TOB1-4 LNCipedia       | lc Inc-TOB1-4; NONHSAT0! chr17  | 50964149 | 50965494 | - |
| TC1700002628.oe.1 | -2.07 | -1.05 | 2.07 | down | 3.97  | 5.01  | RP11-421E1 LNCipedia       | lc Inc-SPAG9-; NONHSAT0! chr17  | 51249577 | 51251748 | - |
| TC1700002663.oe.1 | 2.17  | 1.12  | 2.17 | up   | 8.08  | 6.96  | Inc-COIL-7 LNCipedia       | lc Inc-COIL-7; NONHSAT0! chr17  | 56890521 | 56891526 | - |
| TC1700002709.oe.1 | -2.38 | -1.25 | 2.38 | down | 3.46  | 4.71  | RP11-567L7 NONCODE         | cl Inc-SKA2-2; NONHSAT0! chr17  | 59400488 | 59403303 | - |
| TC1700002777.oe.1 | 2.05  | 1.04  | 2.05 | up   | 6.82  | 5.79  | Inc-ERN1-1 NONCODE         | cl Inc-ERN1-1; NONHSAT0! chr17  | 64039150 | 64041843 | - |
| TC1700002843.oe.1 | -2.16 | -1.11 | 2.16 | down | 3.42  | 4.53  | Inc-ABCA10 LNCipedia       | lc Inc-ABCA10 NONHSAT0! chr17   | 69247376 | 69249141 | - |
| TC1700002921.oe.1 | 2.80  | 1.48  | 2.80 | up   | 6.72  | 5.24  | Inc-GRB2-2 NONCODE         | cl Inc-GRB2-2; NONHSAT0! chr17  | 75506743 | 75507635 | - |
| TC1700002935.oe.1 | 2.05  | 1.03  | 2.05 | up   | 5.83  | 4.80  | Inc-WBP2-2 NONCODE         | cl Inc-WBP2-2 NONHSAT0! chr17   | 75840755 | 75841156 | - |
| TC1700002969.oe.1 | 2.01  | 1.00  | 2.01 | up   | 11.15 | 10.14 | Inc-JMJD6-2 NONCODE        | cl Inc-JMJD6-2 NONHSAT0! chr17  | 76679571 | 76710974 | - |
| TC1700002996.oe.1 | 2.56  | 1.36  | 2.56 | up   | 6.35  | 5.00  | Inc-TK1-2 LNCipedia        | lc Inc-TK1-2;1 NONHSAT0! chr17  | 78223982 | 78224432 | - |
| TC1700003006.oe.1 | 3.00  | 1.58  | 3.00 | up   | 8.21  | 6.63  | Inc-TIMP2-1 LNCipedia      | lc Inc-TIMP2-1 NONHSAT0! chr17  | 78835279 | 78840786 | - |
| TC1700003013.oe.1 | 2.02  | 1.02  | 2.02 | up   | 10.77 | 9.76  | Inc-LGALS3; LNCipedia      | lc Inc-LGALS3; NONHSAT0! chr17  | 78993784 | 78995249 | - |
| TC1700003087.oe.1 | 2.16  | 1.11  | 2.16 | up   | 9.97  | 8.85  | Inc-P4HB-2 LNCipedia       | lc Inc-P4HB-2; NONHSAT0! chr17  | 81869523 | 81870265 | - |
| TC1700003101.oe.1 | 2.58  | 1.37  | 2.58 | up   | 6.78  | 5.41  | Inc-RFNG-2 LNCipedia       | lc Inc-RFNG-2 NONHSAT0! chr17   | 82057880 | 82063477 | - |
| TC17000121.hg.4   | 2.11  | 1.08  | 2.11 | up   | 4.23  | 3.16  | SCARNA21 small Cajal b --- | --- chr17                       | 7906122  | 7906260  | + |
| TC17000179.hg.4   | -2.19 | -1.13 | 2.19 | down | 2.76  | 3.89  | MEIS3P1 Meis homeo ---     | --- chr17                       | 15786850 | 15789705 | + |
| TC17000940.hg.4   | 2.17  | 1.12  | 2.17 | up   | 7.79  | 6.67  | MAFG-AS1 MAFG antise ---   | --- chr17                       | 81927829 | 81930753 | + |
| TC1800000014.oe.1 | -2.21 | -1.15 | 2.21 | down | 3.66  | 4.80  | RP11-806L2 NONCODE         | cl Inc-TYMS-2 NONHSAT0! chr18   | 706523   | 707648   | + |
| TC1800000029.oe.1 | -2.12 | -1.09 | 2.12 | down | 2.63  | 3.72  | Inc-NDC80- NONCODE         | cl Inc-NDC80- NONHSAT0! chr18   | 1963907  | 1972875  | + |
| TC1800000055.oe.1 | -2.32 | -1.22 | 2.32 | down | 4.00  | 5.22  | Inc-AP00247 LNCipedia      | lc Inc-AP00247 --- chr18        | 3441009  | 3441248  | + |
| TC1800000134.oe.1 | -2.49 | -1.32 | 2.49 | down | 5.12  | 6.43  | Inc-TXNDC2 LNCipedia       | lc Inc-TXNDC2 --- chr18         | 9939991  | 9940343  | + |
| TC1800000207.oe.1 | 2.36  | 1.24  | 2.36 | up   | 6.70  | 5.46  | Inc-MC5R-1 NONCODE         | l Inc-MC5R-1 NONHSAT0! chr18    | 14201138 | 14221409 | + |
| TC1800000222.oe.1 | 2.20  | 1.14  | 2.20 | up   | 6.60  | 5.46  | Inc-SNRPD1 LNCipedia       | lc Inc-SNRPD1 NONHSAT0! chr18   | 21449741 | 21451370 | + |
| TC1800000352.oe.1 | -2.06 | -1.04 | 2.06 | down | 3.18  | 4.22  | Inc-GALNT1 LNCipedia       | lc Inc-GALNT1 --- chr18         | 35737684 | 35737896 | + |
| TC1800000497.oe.1 | -6.56 | -2.71 | 6.56 | down | 6.49  | 9.21  | Inc-C18orf2; LNCipedia     | lc Inc-C18orf2; NONHSAT0! chr18 | 54892644 | 54895106 | + |
| TC1800000611.oe.1 | 2.06  | 1.04  | 2.06 | up   | 4.63  | 3.58  | Inc-CCDC10 LNCipedia       | lc Inc-CCDC10 NONHSAT0! chr18   | 68455951 | 68456877 | + |

|                   |       |       |      |      |       |       |                        |                           |       |          |          |   |
|-------------------|-------|-------|------|------|-------|-------|------------------------|---------------------------|-------|----------|----------|---|
| TC1800000615.oe.1 | 2.37  | 1.24  | 2.37 | up   | 4.51  | 3.26  | Inc-DOK6-6 LNCipedia   | lc Inc-DOK6-6 NONHSAT0!   | chr18 | 68846395 | 68874965 | + |
| TC1800000627.oe.1 | -2.37 | -1.25 | 2.37 | down | 7.59  | 8.83  | Inc-DOK6-3 LNCipedia   | lc Inc-DOK6-3 NONHSAT0!   | chr18 | 70327517 | 70330195 | + |
| TC1800000675.oe.1 | 2.37  | 1.25  | 2.37 | up   | 5.77  | 4.53  | Inc-TSHZ1-1 LNCipedia  | lc Inc-TSHZ1-1 NONHSAT0!  | chr18 | 74877198 | 74905938 | + |
| TC1800000787.oe.1 | -2.06 | -1.04 | 2.06 | down | 2.98  | 4.02  | Inc-DLGAP1 LNCipedia   | lc Inc-DLGAP1 NONHSAT0!   | chr18 | 4161046  | 4162646  | - |
| TC1800000825.oe.1 | -2.04 | -1.03 | 2.04 | down | 3.01  | 4.04  | Inc-PPP4R1- LNCipedia  | lc Inc-PPP4R1- ---        | chr18 | 9281111  | 9324470  | - |
| TC1800000849.oe.1 | 2.21  | 1.14  | 2.21 | up   | 6.13  | 4.99  | Inc-RP11-67 LNCipedia  | lc Inc-RP11-67 NONHSAT0!  | chr18 | 10794070 | 10795004 | - |
| TC1800000862.oe.1 | 2.42  | 1.27  | 2.42 | up   | 10.70 | 9.43  | Inc-MPPE1-1 LNCipedia  | lc Inc-MPPE1-1 NONHSAT0!  | chr18 | 11851414 | 11852751 | - |
| TC1800000960.oe.1 | 2.03  | 1.02  | 2.03 | up   | 4.93  | 3.90  | Inc-NPC1-3 LNCipedia   | lc Inc-NPC1-3- ---        | chr18 | 23430389 | 23430611 | - |
| TC1800000961.oe.1 | 2.31  | 1.21  | 2.31 | up   | 11.97 | 10.76 | Inc-ANKRD2 NONCODE     | cl Inc-ANKRD2 NONHSAT0!   | chr18 | 23533202 | 23534560 | - |
| TC1800000962.oe.1 | 2.68  | 1.42  | 2.68 | up   | 8.56  | 7.13  | Inc-ANKRD2 LNCipedia   | lc Inc-ANKRD2 ---         | chr18 | 23539241 | 23539565 | - |
| TC1800001020.oe.1 | -2.17 | -1.12 | 2.17 | down | 4.75  | 5.87  | Inc-MCART2 NONCODE     | cl Inc-MCART2 NONHSAT0!   | chr18 | 31830498 | 31833406 | - |
| TC1800001063.oe.1 | -2.15 | -1.10 | 2.15 | down | 15.33 | 16.44 | Inc-SLC39A1 LNCipedia  | lc Inc-SLC39A1 ---        | chr18 | 36238967 | 36239177 | - |
| TC1800001118.oe.1 | 2.29  | 1.20  | 2.29 | up   | 4.56  | 3.36  | Inc-EPG5-4 LNCipedia   | lc Inc-EPG5-4: NONHSAT0!  | chr18 | 45991936 | 45993974 | - |
| TC1800001203.oe.1 | -2.80 | -1.49 | 2.80 | down | 3.88  | 5.37  | Inc-AC0063 LNCipedia   | lc Inc-AC0063 NONHSAT0!   | chr18 | 56599068 | 56600986 | - |
| TC1800001211.oe.1 | 2.36  | 1.24  | 2.36 | up   | 4.86  | 3.62  | RP11-706P1 N/A         | --- ---                   | chr18 | 57588611 | 57589091 | - |
| TC1800001294.oe.1 | -2.15 | -1.10 | 2.15 | down | 3.05  | 4.16  | Inc-CD226-1 LNCipedia  | lc Inc-CD226-1 NONHSAT0!  | chr18 | 68697376 | 68700423 | - |
| TC1800001376.oe.1 | -2.09 | -1.07 | 2.09 | down | 3.70  | 4.77  | RP11-4B16.1N/A         | --- ---                   | chr18 | 77108284 | 77110537 | - |
| TC1800001377.oe.1 | -2.98 | -1.57 | 2.98 | down | 5.98  | 7.56  | Inc-ZNF516- LNCipedia  | lc Inc-ZNF516- ---        | chr18 | 77125605 | 77127925 | - |
| TC18000020.hg.4   | 2.81  | 1.49  | 2.81 | up   | 8.32  | 6.83  | DLGAP1-AS: DLGAP1 anti | --- ---                   | chr18 | 3594114  | 3598352  | + |
| TC1900000113.oe.1 | 2.34  | 1.23  | 2.34 | up   | 9.48  | 8.25  | Inc-GNA15- NONCODE     | cl Inc-GNA15- NONHSAT0!   | chr19 | 3094649  | 3115428  | + |
| TC1900000116.oe.1 | 2.33  | 1.22  | 2.33 | up   | 6.92  | 5.70  | Inc-CELF5-1 LNCipedia  | lc Inc-CELF5-1 NONHSAT0!  | chr19 | 3207466  | 3209571  | + |
| TC1900000202.oe.1 | -2.21 | -1.15 | 2.21 | down | 7.77  | 8.91  | CTD-2396E7 N/A         | --- ---                   | chr19 | 6469465  | 6470152  | + |
| TC1900000299.oe.1 | 3.38  | 1.76  | 3.38 | up   | 13.75 | 11.99 | Inc-ICAM4-1 LNCipedia  | lc Inc-ICAM4-1: NONHSAT0! | chr19 | 10285485 | 10285698 | + |
| TC1900000322.oe.1 | 4.38  | 2.13  | 4.38 | up   | 9.90  | 7.77  | Inc-SMARCA1 NONCODE    | cl Inc-SMARCA1 NONHSAT0!  | chr19 | 11106356 | 11107515 | + |
| TC1900000323.oe.1 | 2.54  | 1.34  | 2.54 | up   | 6.48  | 5.14  | Inc-SMARCA1 LNCipedia  | lc Inc-SMARCA1 NONHSAT0!  | chr19 | 11110713 | 11113481 | + |
| TC1900000465.oe.1 | 2.13  | 1.09  | 2.13 | up   | 6.54  | 5.45  | Inc-MYO9B- LNCipedia   | lc Inc-MYO9B- NONHSAT0!   | chr19 | 17215392 | 17217489 | + |
| TC1900000471.oe.1 | 2.07  | 1.05  | 2.07 | up   | 8.86  | 7.80  | Inc-MRPL34 LNCipedia   | lc Inc-MRPL34 NONHSAT0!   | chr19 | 17315772 | 17319719 | + |
| TC1900000574.oe.1 | -2.01 | -1.01 | 2.01 | down | 5.43  | 6.43  | Inc-ZNF714- NONCODE    | cl Inc-ZNF714- NONHSAT0!  | chr19 | 21123817 | 21124188 | + |
| TC1900000649.oe.1 | -2.08 | -1.06 | 2.08 | down | 12.90 | 13.95 | NONHSAG0 NONCODE       | cl Inc-VSTM2B NONHSAT0!   | chr19 | 28606688 | 28615229 | + |
| TC1900000726.oe.1 | -2.11 | -1.08 | 2.11 | down | 4.31  | 5.39  | Inc-PDCD2L LNCipedia   | lc Inc-PDCD2L NONHSAT0!   | chr19 | 34389107 | 34390806 | + |
| TC1900000728.oe.1 | 2.14  | 1.10  | 2.14 | up   | 6.91  | 5.82  | Inc-PDCD2L NONCODE     | cl Inc-PDCD2L NONHSAT0!   | chr19 | 34404827 | 34426167 | + |
| TC1900000730.oe.1 | -2.63 | -1.40 | 2.63 | down | 3.54  | 4.94  | Inc-WTIP-1 NONCODE     | cl Inc-WTIP-1: NONHSAT0!  | chr19 | 34542666 | 34543390 | + |
| TC1900000809.oe.1 | -2.37 | -1.25 | 2.37 | down | 10.46 | 11.70 | Inc-CAPNS1 LNCipedia   | lc Inc-CAPNS1 NONHSAT0!   | chr19 | 36228459 | 36235868 | + |
| TC1900001154.oe.1 | -2.05 | -1.04 | 2.05 | down | 11.37 | 12.41 | Inc-CD37-2 LNCipedia   | lc Inc-CD37-2: NONHSAT0!  | chr19 | 49275119 | 49275420 | + |
| TC1900001351.oe.1 | 2.01  | 1.01  | 2.01 | up   | 6.57  | 5.56  | Inc-CCDC10 LNCipedia   | lc Inc-CCDC10 NONHSAT0!   | chr19 | 55654132 | 55655019 | + |
| TC1900001358.oe.1 | -2.09 | -1.07 | 2.09 | down | 3.20  | 4.27  | Inc-EPN1-4 NONCODE     | cl Inc-EPN1-4: NONHSAT0!  | chr19 | 55700049 | 55701219 | + |
| TC1900001394.oe.1 | -2.92 | -1.54 | 2.92 | down | 6.68  | 8.22  | Inc-ZNF460- LNCipedia  | lc Inc-ZNF460- NONHSAT0!  | chr19 | 57304305 | 57308562 | + |
| TC1900001652.oe.1 | 3.12  | 1.64  | 3.12 | up   | 5.33  | 3.69  | Inc-GPR108- LNCipedia  | lc Inc-GPR108- NONHSAT0!  | chr19 | 6712280  | 6713315  | - |
| TC1900001818.oe.1 | 2.09  | 1.06  | 2.09 | up   | 8.11  | 7.05  | Inc-LYL1-2 NONCODE     | cl Inc-LYL1-2:1 NONHSAT0! | chr19 | 13112955 | 13116733 | - |
| TC1900001900.oe.1 | 2.10  | 1.07  | 2.10 | up   | 7.12  | 6.04  | Inc-MED26- NONCODE     | cl Inc-MED26- NONHSAT0!   | chr19 | 16555349 | 16566591 | - |
| TC1900001974.oe.1 | 2.05  | 1.03  | 2.05 | up   | 4.90  | 3.86  | Inc-LPAR2-2 NONCODE    | cl Inc-LPAR2-2 NONHSAT0!  | chr19 | 19588092 | 19588416 | - |
| TC1900001977.oe.1 | 2.02  | 1.02  | 2.02 | up   | 7.34  | 6.33  | Inc-GMIP-2 LNCipedia   | lc Inc-GMIP-2: NONHSAT0!  | chr19 | 19653777 | 19655451 | - |
| TC1900002057.oe.1 | -2.38 | -1.25 | 2.38 | down | 5.55  | 6.80  | Inc-ZNF91-2 LNCipedia  | lc Inc-ZNF91-2: NONHSAT0! | chr19 | 23322938 | 23324418 | - |
| TC1900002169.oe.1 | -2.08 | -1.06 | 2.08 | down | 5.30  | 6.36  | Inc-AC0209 LNCipedia   | lc Inc-AC0209 ---         | chr19 | 35042466 | 35042697 | - |
| TC1900002264.oe.1 | -3.03 | -1.60 | 3.03 | down | 10.58 | 12.18 | Inc-ECH1-4 NONCODE     | cl Inc-ECH1-4: NONHSAT0!  | chr19 | 38801883 | 38803651 | - |
| TC1900002265.oe.1 | -3.47 | -1.79 | 3.47 | down | 8.19  | 9.99  | Inc-ECH1-3 NONCODE     | cl Inc-ECH1-3: NONHSAT0!  | chr19 | 38806461 | 38812945 | - |
| TC1900002328.oe.1 | 2.05  | 1.04  | 2.05 | up   | 8.80  | 7.76  | Inc-B9D2-2 NONCODE     | cl Inc-B9D2-2: NONHSAT0!  | chr19 | 41332055 | 41344883 | - |
| TC1900002421.oe.1 | -2.06 | -1.05 | 2.06 | down | 3.76  | 4.81  | AC006126.4 LNCipedia   | lc Inc-EXOC3L ---         | chr19 | 45238632 | 45245370 | - |
| TC1900002476.oe.1 | 2.16  | 1.11  | 2.16 | up   | 8.01  | 6.89  | Inc-TMEM11 LNCipedia   | lc Inc-TMEM11 NONHSAT0!   | chr19 | 47093749 | 47094487 | - |

|                   |        |       |       |      |       |       |                        |                     |                       |          |          |          |   |
|-------------------|--------|-------|-------|------|-------|-------|------------------------|---------------------|-----------------------|----------|----------|----------|---|
| TC1900002597.oe.1 | -2.17  | -1.12 | 2.17  | down | 3.53  | 4.65  | CTB-147C22 N/A         | ---                 | ---                   | chr19    | 50962197 | 50962781 | - |
| TC1900002696.oe.1 | -3.80  | -1.92 | 3.80  | down | 4.75  | 6.68  | NONHSAG0 LNCipedia     | lc                  | Inc-LENG9-:NONHSAT1   | chr19    | 54438010 | 54438346 | - |
| TC1900002698.oe.1 | -2.20  | -1.14 | 2.20  | down | 5.61  | 6.74  | NONHSAG0 LNCipedia     | lc                  | Inc-LENG9-:NONHSAT1   | chr19    | 54438665 | 54439544 | - |
| TC1900002749.oe.1 | -2.38  | -1.25 | 2.38  | down | 5.64  | 6.90  | AC006116.1:NONCODE     | cl                  | Inc-ZNF582-NONHSAT0   | chr19    | 56311928 | 56312486 | - |
| TC19000570.hg.4   | -11.21 | -3.49 | 11.21 | down | 5.98  | 9.47  | CYP2B7P cytochrome     | ---                 | ---                   | chr19    | 40924265 | 40950660 | + |
| TC19000679.hg.4   | 2.04   | 1.03  | 2.04  | up   | 5.48  | 4.45  | NAPA-AS1 NAPA antise   | ---                 | ---                   | chr19    | 47484282 | 47501597 | + |
| TC19000694.hg.4   | -2.08  | -1.06 | 2.08  | down | 3.68  | 4.74  | SNAR-C3 small ILF3/N   | ---                 | ---                   | chr19    | 47950296 | 47950414 | + |
| TC19000708.hg.4   | -2.48  | -1.31 | 2.48  | down | 4.14  | 5.45  | SEC1P secretory blc    | ---                 | ---                   | chr19    | 48638039 | 48682245 | + |
| TC19001130.hg.4   | -2.80  | -1.49 | 2.80  | down | 5.67  | 7.16  | RAB11B-AS1 RAB11B anti | ---                 | ---                   | chr19    | 8374376  | 8390691  | - |
| TC2000000038.oe.1 | 2.24   | 1.16  | 2.24  | up   | 7.74  | 6.57  | Inc-TMC2-3 NONCODE     | cl                  | Inc-TMC2-3 NONHSAT0   | chr20    | 2652633  | 2653820  | + |
| TC2000000177.oe.1 | 2.06   | 1.04  | 2.06  | up   | 13.06 | 12.02 | Inc-POLR3F- LNCipedia  | lc                  | Inc-POLR3F- NONHSAT0  | chr20    | 18510977 | 18515984 | + |
| TC2000000191.oe.1 | -2.16  | -1.11 | 2.16  | down | 3.55  | 4.66  | Inc-INSM1-: LNCipedia  | lc                  | Inc-INSM1-:NONHSAT0   | chr20    | 20354545 | 20355962 | + |
| TC2000000285.oe.1 | 2.43   | 1.28  | 2.43  | up   | 11.36 | 10.08 | Inc-REM1-2 NONCODE     | cl                  | Inc-REM1-2 NONHSAT0   | chr20    | 31514655 | 31538228 | + |
| TC2000000323.oe.1 | -2.26  | -1.18 | 2.26  | down | 3.84  | 5.02  | Inc-C20orf1- LNCipedia | lc                  | Inc-C20orf1- ---      | chr20    | 33539090 | 33539334 | + |
| TC2000000364.oe.1 | 2.12   | 1.08  | 2.12  | up   | 6.96  | 5.87  | Inc-C20orf2- NONCODE   | cl                  | Inc-C20orf2- NONHSAT0 | chr20    | 36578807 | 36592298 | + |
| TC2000000439.oe.1 | -2.42  | -1.27 | 2.42  | down | 7.46  | 8.74  | Inc-SGK2-1 LNCipedia   | lc                  | Inc-SGK2-1: NONHSAT0  | chr20    | 43564718 | 43588237 | + |
| TC2000000552.oe.1 | 3.11   | 1.64  | 3.11  | up   | 7.78  | 6.15  | Inc-SNAI1-4 LNCipedia  | lc                  | Inc-SNAI1-4 NONHSAT0  | chr20    | 50191750 | 50192009 | + |
| TC2000000682.oe.1 | 2.59   | 1.37  | 2.59  | up   | 8.85  | 7.47  | Inc-OSBPL2- LNCipedia  | lc                  | Inc-OSBPL2- NONHSAT0  | chr20    | 62304159 | 62306734 | + |
| TC2000000856.oe.1 | 2.01   | 1.01  | 2.01  | up   | 10.53 | 9.52  | Inc-JAG1-7 LNCipedia   | lc                  | Inc-JAG1-7: NONHSAT0  | chr20    | 10673629 | 10673976 | - |
| TC2000000888.oe.1 | -3.28  | -1.71 | 3.28  | down | 6.27  | 7.99  | Inc-SEL1L2- LNCipedia  | lc                  | Inc-SEL1L2- NONHSAT0  | chr20    | 14328922 | 14337614 | - |
| TC2000001019.oe.1 | -2.06  | -1.04 | 2.06  | down | 2.71  | 3.75  | Inc-FAM182 LNCipedia   | lc                  | Inc-FAM182 ---        | chr20    | 25722019 | 25811201 | - |
| TC2000001072.oe.1 | 2.04   | 1.03  | 2.04  | up   | 7.52  | 6.50  | Inc-E2F1-1 LNCipedia   | lc                  | Inc-E2F1-1:1NONHSAT0  | chr20    | 33669143 | 33674420 | - |
| TC2000001107.oe.1 | 2.03   | 1.02  | 2.03  | up   | 12.36 | 11.34 | Inc-FAM83C NONCODE     | cl                  | Inc-FAM83C NONHSAT0   | chr20    | 35280074 | 35284702 | - |
| TC2000001284.oe.1 | 2.07   | 1.05  | 2.07  | up   | 3.72  | 2.66  | Inc-PTGIS-2 LNCipedia  | lc                  | Inc-PTGIS-2 ---       | chr20    | 49474123 | 49474911 | - |
| TC20000751.hg.4   | -2.24  | -1.16 | 2.24  | down | 2.67  | 3.83  | DEFB122 defensin, bei  | ---                 | ---                   | chr20    | 31421436 | 31429180 | - |
| TC2100000339.oe.1 | -2.01  | -1.01 | 2.01  | down | 2.98  | 3.98  | Inc-BACE2-: LNCipedia  | lc                  | Inc-BACE2-: ---       | chr21    | 40943256 | 40946203 | + |
| TC2100000343.oe.1 | 3.44   | 1.78  | 3.44  | up   | 6.40  | 4.61  | Inc-FAM3B- NONCODE     | cl                  | Inc-FAM3B- NONHSAT0   | chr21    | 41225476 | 41241903 | + |
| TC2100000344.oe.1 | 4.42   | 2.15  | 4.42  | up   | 9.38  | 7.24  | Inc-FAM3B- LNCipedia   | lc                  | Inc-FAM3B- NONHSAT0   | chr21    | 41245959 | 41275538 | + |
| TC2100000345.oe.1 | 2.23   | 1.16  | 2.23  | up   | 5.84  | 4.68  | Inc-FAM3B- NONCODE     | cl                  | Inc-FAM3B- NONHSAT0   | chr21    | 41252465 | 41257326 | + |
| TC2100000367.oe.1 | -2.33  | -1.22 | 2.33  | down | 6.08  | 7.30  | Inc-UBASH3 NONCODE     | cl                  | Inc-UBASH3 NONHSAT0   | chr21    | 42292533 | 42293943 | + |
| TC2100000463.oe.1 | 2.39   | 1.26  | 2.39  | up   | 5.54  | 4.28  | Inc-COL18A gene_id XLO | Inc-COL18A NONHSAT0 | chr21                 | 45370948 | 45371927 | +        |   |
| TC2100000513.oe.1 | -3.29  | -1.72 | 3.29  | down | 15.34 | 17.06 | CH507-513: N/A         | ---                 | ---                   | chr21    | 8210384  | 8211306  | - |
| TC2100000514.oe.1 | -3.71  | -1.89 | 3.71  | down | 15.28 | 17.17 | CH507-513: N/A         | ---                 | ---                   | chr21    | 8254592  | 8255514  | - |
| TC2100000515.oe.1 | -3.82  | -1.94 | 3.82  | down | 15.08 | 17.02 | CH507-513: N/A         | ---                 | ---                   | chr21    | 8393419  | 8394341  | - |
| TC2100000516.oe.1 | -3.07  | -1.62 | 3.07  | down | 15.45 | 17.07 | CH507-513: N/A         | ---                 | ---                   | chr21    | 8437629  | 8438551  | - |
| TC2100000518.oe.1 | -2.34  | -1.23 | 2.34  | down | 13.69 | 14.92 | Inc-TPTE-3 NONCODE     | cl                  | Inc-TPTE-3:1NONHSAT0  | chr21    | 8987561  | 8988887  | - |
| TC2100000550.oe.1 | -2.66  | -1.41 | 2.66  | down | 5.21  | 6.62  | Inc-LIPI-5 LNCipedia   | lc                  | Inc-LIPI-5:1 NONHSAT1 | chr21    | 13916917 | 13917802 | - |
| TC2100000601.oe.1 | -2.58  | -1.37 | 2.58  | down | 2.65  | 4.01  | Inc-TMPRSS LNCipedia   | lc                  | Inc-TMPRSS NONHSAT0   | chr21    | 18574969 | 18578511 | - |
| TC2100000634.oe.1 | 2.53   | 1.34  | 2.53  | up   | 4.47  | 3.13  | Inc-MRPL39 LNCipedia   | lc                  | Inc-MRPL39 ---        | chr21    | 23226412 | 23243239 | - |
| TC2100000653.oe.1 | -2.37  | -1.24 | 2.37  | down | 2.87  | 4.11  | Inc-MRPL39 LNCipedia   | lc                  | Inc-MRPL39 NONHSAT0   | chr21    | 25430145 | 25430357 | - |
| TC2100000852.oe.1 | -2.38  | -1.25 | 2.38  | down | 4.30  | 5.55  | Inc-RIPK4-6 NONCODE    | cl                  | Inc-RIPK4-6: NONHSAT0 | chr21    | 41465890 | 41468837 | - |
| TC2100000872.oe.1 | 11.58  | 3.53  | 11.58 | up   | 9.01  | 5.48  | Inc-TFF1-1 LNCipedia   | lc                  | Inc-TFF1-1:1NONHSAT0  | chr21    | 42362282 | 42366535 | - |
| TC2100000950.oe.1 | 2.04   | 1.03  | 2.04  | up   | 10.54 | 9.51  | Inc-SLC19A1NONCODE     | cl                  | Inc-SLC19A1NONHSAT0   | chr21    | 45483805 | 45484746 | - |
| TC21000116.hg.4   | 2.88   | 1.52  | 2.88  | up   | 5.26  | 3.73  | C21orf119 chromosome   | ---                 | ---                   | chr21    | 32393130 | 32393960 | + |
| TC2200000011.oe.1 | -2.21  | -1.15 | 2.21  | down | 6.38  | 7.53  | LL22NC03-: LNCipedia   | lc                  | Inc-AP0005: ---       | chr22    | 15823197 | 15823890 | + |
| TC2200000270.oe.1 | -2.03  | -1.02 | 2.03  | down | 3.35  | 4.37  | Inc-MYO18E LNCipedia   | lc                  | Inc-MYO18E ---        | chr22    | 25606234 | 25616343 | + |
| TC2200000455.oe.1 | 2.01   | 1.01  | 2.01  | up   | 4.98  | 3.98  | Inc-KCTD17- LNCipedia  | lc                  | Inc-KCTD17- NONHSAT0  | chr22    | 37300882 | 37303295 | + |
| TC2200000466.oe.1 | 2.12   | 1.08  | 2.12  | up   | 11.59 | 10.51 | Inc-NOL12.1 LNCipedia  | lc                  | Inc-NOL12.1NONHSAT0   | chr22    | 37675652 | 37677228 | + |
| TC2200000580.oe.1 | 3.57   | 1.84  | 3.57  | up   | 6.75  | 4.91  | Inc-SERHL2- NONCODE    | cl                  | Inc-SERHL2- NONHSAT0  | chr22    | 42614914 | 42616588 | + |

|                   |       |       |      |      |       |       |                          |                        |       |          |          |   |
|-------------------|-------|-------|------|------|-------|-------|--------------------------|------------------------|-------|----------|----------|---|
| TC2200000632.oe.1 | -2.01 | -1.01 | 2.01 | down | 4.85  | 5.85  | lnc-FBLN1-3 LNCipedia    | lnc-FBLN1-3 ---        | chr22 | 45724103 | 45752075 | + |
| TC2200000749.oe.1 | 2.08  | 1.06  | 2.08 | up   | 9.29  | 8.24  | lnc-ATP6V1f NONCODE c    | lnc-ATP6V1f NONHSAT0f  | chr22 | 17592137 | 17628822 | - |
| TC2200000855.oe.1 | -2.02 | -1.01 | 2.02 | down | 4.57  | 5.58  | LL22NC03-2 N/A           | ---                    | chr22 | 22283928 | 22287220 | - |
| TC2200000987.oe.1 | 2.17  | 1.12  | 2.17 | up   | 12.55 | 11.44 | lnc-TBC1D1f LNCipedia    | lnc-TBC1D1f NONHSAT0f  | chr22 | 30342547 | 30346489 | - |
| TC2200001003.oe.1 | -2.37 | -1.24 | 2.37 | down | 5.66  | 6.90  | RP3-430N8. LNCipedia     | lnc-MORC2- NONHSAT0f   | chr22 | 30977516 | 30977858 | - |
| TC2200001074.oe.1 | 2.17  | 1.12  | 2.17 | up   | 8.21  | 7.10  | lnc-FOXRED LNCipedia     | lnc-FOXRED NONHSAT0f   | chr22 | 36510856 | 36511641 | - |
| TC2200001091.oe.1 | 3.53  | 1.82  | 3.53 | up   | 7.66  | 5.84  | lnc-SSTR3-2 LNCipedia    | lnc-SSTR3-2 NONHSAT0f  | chr22 | 37225264 | 37225995 | - |
| TC2200001106.oe.1 | 2.28  | 1.19  | 2.28 | up   | 6.39  | 5.20  | lnc-C22orf2f NONCODE c   | lnc-C22orf2f NONHSAT1f | chr22 | 37832676 | 37840234 | - |
| TC2200001165.oe.1 | 2.66  | 1.41  | 2.66 | up   | 7.23  | 5.82  | lnc-PMM1-3 NONCODE c     | lnc-PMM1-3 NONHSAT0f   | chr22 | 41532625 | 41544386 | - |
| TC2200001219.oe.1 | 2.18  | 1.13  | 2.18 | up   | 4.69  | 3.57  | lnc-LDOC1L LNCipedia     | lnc-LDOC1L NONHSAT0f   | chr22 | 44514717 | 44520948 | - |
| TC22000220.hg.4   | -2.15 | -1.11 | 2.15 | down | 11.32 | 12.43 | TUG1                     | taurine upre: ---      | chr22 | 30969648 | 30979394 | + |
| TC22000515.hg.4   | 2.04  | 1.03  | 2.04 | up   | 8.71  | 7.68  | PI4KAP1//PI4 phosphatidy | ---                    | chr22 | 18533671 | 18577948 | - |
| TC22000847.hg.4   | 2.17  | 1.11  | 2.17 | up   | 6.42  | 5.31  | RRP7B//RNU RNA, U6 sm    | ---                    | chr22 | 42555223 | 42582038 | - |
