# Supplementary material for: Differentially Expressed Long Noncoding RNAs Involved in FUBP1 Promoting Hepatocellular Carcinoma Cells Proliferation
Source: Hindawi journal article supplement (doi:10.1155/2021/6664519), 2021-01-01
Supplement: f3 [file 6664519.f3.pdf]

| Probe Set ID      | FC (Huh Log FC (FC (abs) Regulati | Huh7-FL | Huh7-n | GeneSymbol | Description | IncipediaID | NonCodeID               | Chr                       | start | stop     | strand      |
|-------------------|-----------------------------------|---------|--------|------------|-------------|-------------|-------------------------|---------------------------|-------|----------|-------------|
| TC0100000260.oe.1 | 2.05                              | 1.04    | 2.05   | up         | 4.39        | 3.35        | Inc-CELA2B- LNCipedia   | lc Inc-CELA2B- ---        | chr1  | 15538858 | 15541629 +  |
| TC0100000281.oe.1 | 2.07                              | 1.05    | 2.07   | up         | 6.58        | 5.53        | Inc-C1orf14- LNCipedia  | lc Inc-C1orf14- NONHSAT0( | chr1  | 16440736 | 16441619 +  |
| TC0100000284.oe.1 | 3.15                              | 1.66    | 3.15   | up         | 5.93        | 4.27        | RP4-798A1C LNCipedia    | lc Inc-AL35514 NONHSAT0(  | chr1  | 16514643 | 16515754 +  |
| TC0100000412.oe.1 | 2.01                              | 1.00    | 2.01   | up         | 6.99        | 5.98        | Inc-C1orf13( NONCODE    | cl Inc-C1orf13( NONHSAT0( | chr1  | 24666555 | 24669264 +  |
| TC0100000413.oe.1 | 2.14                              | 1.10    | 2.14   | up         | 9.27        | 8.17        | Inc-C1orf13( LNCipedia  | lc Inc-C1orf13( NONHSAT0( | chr1  | 24669583 | 24671469 +  |
| TC0100000619.oe.1 | -2.32                             | -1.22   | 2.32   | down       | 4.42        | 5.64        | Inc-EIF2C3- LNCipedia   | lc Inc-EIF2C3- ---        | chr1  | 36060096 | 36060737 +  |
| TC0100000673.oe.1 | 2.10                              | 1.07    | 2.10   | up         | 4.24        | 3.18        | NONHSAG0 LNCipedia      | lc Inc-NDUF55 NONHSAT0(   | chr1  | 39206512 | 39206957 +  |
| TC0100000709.oe.1 | -2.55                             | -1.35   | 2.55   | down       | 10.46       | 11.81       | OTTHUMG0 LNCipedia      | lc Inc-ZNF643- NONHSAT0(  | chr1  | 40464319 | 40466767 +  |
| TC0100000713.oe.1 | 2.05                              | 1.03    | 2.05   | up         | 8.03        | 6.99        | Inc-DEM1-3 NONCODE      | cl Inc-DEM1-3 NONHSAT0(   | chr1  | 40531722 | 40547785 +  |
| TC0100000714.oe.1 | 2.62                              | 1.39    | 2.62   | up         | 7.92        | 6.53        | Inc-DEM1-2 LNCipedia    | lc Inc-DEM1-2 ---         | chr1  | 40542029 | 40542308 +  |
| TC0100000757.oe.1 | 3.20                              | 1.68    | 3.20   | up         | 8.84        | 7.16        | Inc-MPL-1 NONCODE       | cl Inc-MPL-1-1 NONHSAT0(  | chr1  | 43361058 | 43363066 +  |
| TC0100000762.oe.1 | -2.01                             | -1.01   | 2.01   | down       | 4.34        | 5.35        | Inc-PTPRF-1 LNCipedia   | lc Inc-PTPRF-1 NONHSAT0(  | chr1  | 43525187 | 43553539 +  |
| TC0100001031.oe.1 | -2.13                             | -1.09   | 2.13   | down       | 4.45        | 5.54        | Inc-FOXD3- LNCipedia    | lc Inc-FOXD3- NONHSAT0(   | chr1  | 63324699 | 63325126 +  |
| TC0100001034.oe.1 | 2.05                              | 1.04    | 2.05   | up         | 8.11        | 7.07        | Inc-EFCAB7- LNCipedia   | lc Inc-EFCAB7- NONHSAT0(  | chr1  | 63523372 | 63532696 +  |
| TC0100001171.oe.1 | 2.34                              | 1.23    | 2.34   | up         | 5.50        | 4.27        | Inc-LPHN2- LNCipedia    | lc Inc-LPHN2- NONHSAT0(   | chr1  | 81992876 | 81996530 +  |
| TC0100001257.oe.1 | 2.59                              | 1.37    | 2.59   | up         | 10.98       | 9.61        | Inc-MTF2-3 LNCipedia    | lc Inc-MTF2-3: NONHSAT0(  | chr1  | 93205556 | 93246901 +  |
| TC0100001258.oe.1 | 2.16                              | 1.11    | 2.16   | up         | 8.75        | 7.64        | Inc-DR1-4 LNCipedia     | lc Inc-DR1-4:1 NONHSAT0(  | chr1  | 93254511 | 93264949 +  |
| TC0100001301.oe.1 | 2.40                              | 1.27    | 2.40   | up         | 10.42       | 9.16        | Inc-RWDD3- NONCODE      | cl Inc-RWDD3- NONHSAT0(   | chr1  | 96785194 | 96813447 +  |
| TC0100001326.oe.1 | 2.32                              | 1.21    | 2.32   | up         | 4.30        | 3.09        | Inc-SLC35A5 NONCODE     | cl Inc-SLC35A5: NONHSAT0( | chr1  | 99966041 | 99966379 +  |
| TC0100001344.oe.1 | 2.22                              | 1.15    | 2.22   | up         | 5.83        | 4.68        | RP4-549L20 LNCipedia    | lc Inc-SLC30A7 ---        | chr1  | 1.01E+08 | 100895356 + |
| TC0100001372.oe.1 | 2.54                              | 1.35    | 2.54   | up         | 6.71        | 5.37        | Inc-AMY2B- LNCipedia    | lc Inc-AMY2B- NONHSAT0(   | chr1  | 1.04E+08 | 103551263 + |
| TC0100001419.oe.1 | 2.14                              | 1.10    | 2.14   | up         | 4.48        | 3.38        | Inc-SYPL2-1 LNCipedia   | lc Inc-SYPL2-1 NONHSAT0(  | chr1  | 1.09E+08 | 109425540 + |
| TC0100001503.oe.1 | -2.06                             | -1.04   | 2.06   | down       | 4.31        | 5.36        | Inc-LRIG2-1 gene_id XLC | Inc-LRIG2-1 NONHSAT0(     | chr1  | 1.13E+08 | 113132124 + |
| TC0100001550.oe.1 | -2.70                             | -1.44   | 2.70   | down       | 9.14        | 10.58       | Inc-FAM46C LNCipedia    | lc Inc-FAM46C NONHSAT0(   | chr1  | 1.18E+08 | 117528869 + |
| TC0100001609.oe.1 | 2.18                              | 1.12    | 2.18   | up         | 11.45       | 10.33       | RNVU1-14 RNA, variant   | --- ---                   | chr1  | 1.45E+08 | 145281462 + |
| TC0100001683.oe.1 | 2.15                              | 1.11    | 2.15   | up         | 8.95        | 7.84        | Inc-RPRD2- LNCipedia    | cl Inc-RPRD2- NONHSAT0(   | chr1  | 1.5E+08  | 150344375 + |
| TC0100001711.oe.1 | 2.07                              | 1.05    | 2.07   | up         | 5.41        | 4.37        | Inc-TNFAIP8 LNCipedia   | lc Inc-TNFAIP8 NONHSAT0(  | chr1  | 1.51E+08 | 151166950 + |
| TC0100001743.oe.1 | -2.08                             | -1.06   | 2.08   | down       | 3.10        | 4.16        | NONHSAG0 LNCipedia      | lc Inc-OAZ3-4 NONHSAT0(   | chr1  | 1.52E+08 | 152125065 + |
| TC0100001776.oe.1 | 2.07                              | 1.05    | 2.07   | up         | 6.78        | 5.73        | RP11-422P2 LNCipedia    | lc Inc-CREB3L4 ---        | chr1  | 1.54E+08 | 153966930 + |
| TC0100001799.oe.1 | 2.64                              | 1.40    | 2.64   | up         | 8.56        | 7.16        | Inc-CKS1B-1 NONCODE     | cl Inc-CKS1B-1 NONHSAT0(  | chr1  | 1.55E+08 | 154979248 + |
| TC0100001874.oe.1 | -2.12                             | -1.08   | 2.12   | down       | 3.53        | 4.62        | Inc-APCS-3 LNCipedia    | lc Inc-APCS-3: NONHSAT0(  | chr1  | 1.6E+08  | 159621990 + |
| TC0100001928.oe.1 | -2.93                             | -1.55   | 2.93   | down       | 6.90        | 8.45        | Inc-NOS1AF LNCipedia    | lc Inc-NOS1AF NONHSAT0(   | chr1  | 1.62E+08 | 161960124 + |
| TC0100001951.oe.1 | 2.05                              | 1.03    | 2.05   | up         | 9.61        | 8.58        | Inc-RGS4-4 NONCODE      | cl Inc-RGS4-4: NONHSAT0(  | chr1  | 1.63E+08 | 163343815 + |
| TC0100001963.oe.1 | 2.38                              | 1.25    | 2.38   | up         | 4.89        | 3.64        | NONHSAG0 LNCipedia      | lc Inc-LRRC52- NONHSAT0(  | chr1  | 1.65E+08 | 164829952 + |
| TC0100002137.oe.1 | -2.59                             | -1.37   | 2.59   | down       | 3.07        | 4.44        | Inc-LHX4-3 LNCipedia    | lc Inc-LHX4-3: ---        | chr1  | 1.8E+08  | 180384451 + |
| TC0100002344.oe.1 | 2.20                              | 1.14    | 2.20   | up         | 11.20       | 10.06       | Inc-RNPEP- LNCipedia    | cl Inc-RNPEP- NONHSAT0(   | chr1  | 2.02E+08 | 201970351 + |
| TC0100002396.oe.1 | -2.49                             | -1.31   | 2.49   | down       | 4.98        | 6.29        | Inc-MDM4- LNCipedia     | lc Inc-MDM4- NONHSAT0(    | chr1  | 2.04E+08 | 204404742 + |
| TC0100002534.oe.1 | 3.24                              | 1.70    | 3.24   | up         | 10.62       | 8.93        | Inc-TATDN3 LNCipedia    | lc Inc-TATDN3 NONHSAT0(   | chr1  | 2.13E+08 | 212885565 + |
| TC0100002545.oe.1 | 2.81                              | 1.49    | 2.81   | up         | 5.57        | 4.08        | Inc-CENPF- LNCipedia    | cl Inc-CENPF- NONHSAT0(   | chr1  | 2.15E+08 | 214615190 + |
| TC0100002674.oe.1 | 2.19                              | 1.13    | 2.19   | up         | 3.89        | 2.76        | OTTHUMG0 LNCipedia      | lc Inc-ADCK3- NONHSAT0(   | chr1  | 2.27E+08 | 227183444 + |
| TC0100002686.oe.1 | 2.63                              | 1.39    | 2.63   | up         | 5.67        | 4.28        | Inc-ARF1-1 NONCODE      | cl Inc-ARF1-1: NONHSAT0(  | chr1  | 2.28E+08 | 228104946 + |
| TC0100002863.oe.1 | 2.12                              | 1.08    | 2.12   | up         | 5.70        | 4.62        | Inc-FAM36A LNCipedia    | lc Inc-FAM36A ---         | chr1  | 2.45E+08 | 244865272 + |
| TC0100002878.oe.1 | -2.57                             | -1.36   | 2.57   | down       | 7.89        | 9.25        | Inc-SCCPDH LNCipedia    | lc Inc-SCCPDH NONHSAT0(   | chr1  | 2.47E+08 | 246668356 + |
| TC0100003415.oe.1 | -2.53                             | -1.34   | 2.53   | down       | 14.46       | 15.80       | Inc-PTP4A2- NONCODE     | cl Inc-PTP4A2- NONHSAT0(  | chr1  | 31906421 | 31908111 -  |
| TC0100003509.oe.1 | 2.08                              | 1.06    | 2.08   | up         | 9.36        | 8.30        | Inc-SNIP1-1 LNCipedia   | lc Inc-SNIP1-1 NONHSAT0(  | chr1  | 37576170 | 37582809 -  |
| TC0100003545.oe.1 | 2.28                              | 1.19    | 2.28   | up         | 4.56        | 3.37        | Inc-PPT1-2 LNCipedia    | lc Inc-PPT1-2: ---        | chr1  | 40029014 | 40030573 -  |
| TC0100003723.oe.1 | -2.22                             | -1.15   | 2.22   | down       | 3.08        | 4.23        | Inc-RAB3B- LNCipedia    | lc Inc-RAB3B- NONHSAT0(   | chr1  | 51856526 | 51860389 -  |
| TC0100003755.oe.1 | 2.96                              | 1.56    | 2.96   | up         | 14.36       | 12.79       | Inc-YIPF1-1 NONCODE     | cl Inc-YIPF1-1: NONHSAT0( | chr1  | 53818970 | 53838463 -  |

|                   |       |       |       |      |       |       |                                                     |          |             |
|-------------------|-------|-------|-------|------|-------|-------|-----------------------------------------------------|----------|-------------|
| TC0100003797.oe.1 | -2.90 | -1.54 | 2.90  | down | 3.78  | 5.31  | Inc-C8B-1 NONCODE c Inc-C8B-1:2 NONHSAT0 chr1       | 56956855 | 56966140 -  |
| TC0100003810.oe.1 | 2.90  | 1.53  | 2.90  | up   | 5.22  | 3.68  | Inc-TACSTD LNCipedia lc Inc-TACSTD NONHSAT0 chr1    | 58654740 | 58669291 -  |
| TC0100003945.oe.1 | 4.28  | 2.10  | 4.28  | up   | 10.90 | 8.80  | Inc-FUBP1-2 NONCODE c Inc-FUBP1-2 NONHSAT0 chr1     | 77944055 | 77960785 -  |
| TC0100003984.oe.1 | -2.71 | -1.44 | 2.71  | down | 12.28 | 13.72 | Inc-CTBS-1 NONCODE c Inc-CTBS-1: NONHSAT0 chr1      | 84553121 | 84574480 -  |
| TC0100003997.oe.1 | -3.48 | -1.80 | 3.48  | down | 5.11  | 6.91  | Inc-C1orf52 LNCipedia lc Inc-C1orf52 NONHSAT0 chr1  | 85174312 | 85176880 -  |
| TC0100004080.oe.1 | 2.04  | 1.03  | 2.04  | up   | 10.40 | 9.37  | Inc-GCLM-4 LNCipedia lc Inc-GCLM-4 NONHSAT0 chr1    | 93869780 | 93870997 -  |
| TC0100004092.oe.1 | 19.84 | 4.31  | 19.84 | up   | 10.20 | 5.89  | Inc-ARHGAF NONCODE c Inc-ARHGAF NONHSAT0 chr1       | 94148988 | 94154829 -  |
| TC0100004122.oe.1 | -3.01 | -1.59 | 3.01  | down | 5.06  | 6.65  | Inc-LPPR5.1 LNCipedia lc Inc-LPPR5.1 NONHSAT0 chr1  | 97691207 | 97721654 -  |
| TC0100004124.oe.1 | -2.36 | -1.24 | 2.36  | down | 5.41  | 6.64  | Inc-LPPR5.1 LNCipedia lc Inc-LPPR5.1 NONHSAT0 chr1  | 97855030 | 97920997 -  |
| TC0100004205.oe.1 | 2.22  | 1.15  | 2.22  | up   | 7.01  | 5.86  | Inc-GSTM3 LNCipedia lc Inc-GSTM3 NONHSAT0 chr1      | 1.1E+08  | 109751940 - |
| TC0100004243.oe.1 | 2.26  | 1.18  | 2.26  | up   | 3.84  | 2.66  | Inc-FAM212 LNCipedia lc Inc-FAM212 NONHSAT0 chr1    | 1.12E+08 | 111772569 - |
| TC0100004270.oe.1 | -2.39 | -1.26 | 2.39  | down | 6.28  | 7.54  | Inc-RSN1- LNCipedia lc Inc-RSN1-: NONHSAT0 chr1     | 1.14E+08 | 113764810 - |
| TC0100004282.oe.1 | 2.17  | 1.12  | 2.17  | up   | 4.32  | 3.20  | Inc-BCAS2- LNCipedia lc Inc-BCAS2-: --- chr1        | 1.15E+08 | 114558681 - |
| TC0100004366.oe.1 | 2.08  | 1.06  | 2.08  | up   | 13.69 | 12.64 | Inc-PPIAL4G LNCipedia lc Inc-PPIAL4G NONHSAT0 chr1  | 1.44E+08 | 143971749 - |
| TC0100004378.oe.1 | -2.29 | -1.19 | 2.29  | down | 8.70  | 9.89  | Inc-PDZK1- LNCipedia lc Inc-PDZK1-: NONHSAT0 chr1   | 1.46E+08 | 145672848 - |
| TC0100004444.oe.1 | -2.03 | -1.02 | 2.03  | down | 9.53  | 10.55 | Inc-C1orf13 LNCipedia lc Inc-C1orf13: NONHSAT0 chr1 | 1.51E+08 | 150575125 - |
| TC0100004449.oe.1 | 2.86  | 1.51  | 2.86  | up   | 5.81  | 4.30  | Inc-HORMA LNCipedia lc Inc-HORMA NONHSAT0 chr1      | 1.51E+08 | 150720888 - |
| TC0100004580.oe.1 | 2.40  | 1.26  | 2.40  | up   | 7.63  | 6.36  | Inc-RIT1-1 NONCODE c Inc-RIT1-1:1 NONHSAT0 chr1     | 1.56E+08 | 155917574 - |
| TC0100004592.oe.1 | 2.23  | 1.15  | 2.23  | up   | 11.64 | 10.49 | Inc-C1orf85 LNCipedia lc Inc-C1orf85 NONHSAT0 chr1  | 1.56E+08 | 156338206 - |
| TC0100004676.oe.1 | -2.64 | -1.40 | 2.64  | down | 13.30 | 14.69 | Inc-APOA2- NONCODE c Inc-APOA2- NONHSAT0 chr1       | 1.61E+08 | 161223631 - |
| TC0100004822.oe.1 | -2.20 | -1.14 | 2.20  | down | 3.75  | 4.88  | Inc-RFWD2 LNCipedia lc Inc-RFWD2- NONHSAT0 chr1     | 1.76E+08 | 175922179 - |
| TC0100004826.oe.1 | -2.08 | -1.06 | 2.08  | down | 7.73  | 8.79  | Inc-ASTN1-: NONCODE c Inc-ASTN1-: NONHSAT0 chr1     | 1.77E+08 | 176616789 - |
| TC0100004859.oe.1 | 2.00  | 1.00  | 2.00  | up   | 4.02  | 3.02  | OTTHUMG0 NONCODE c Inc-TOR1AIF NONHSAT0 chr1        | 1.8E+08  | 179836124 - |
| TC0100004916.oe.1 | 2.06  | 1.05  | 2.06  | up   | 7.20  | 6.16  | Inc-FAM129 LNCipedia lc Inc-FAM129 NONHSAT0 chr1    | 1.85E+08 | 185120869 - |
| TC0100004961.oe.1 | -2.12 | -1.08 | 2.12  | down | 4.10  | 5.18  | Inc-GLRX2-1 LNCipedia lc Inc-GLRX2-1 --- chr1       | 1.93E+08 | 193091556 - |
| TC0100004976.oe.1 | 3.03  | 1.60  | 3.03  | up   | 9.76  | 8.16  | Inc-ZBTB41 LNCipedia lc Inc-ZBTB41- NONHSAT0 chr1   | 1.97E+08 | 197146535 - |
| TC0100005156.oe.1 | 2.37  | 1.25  | 2.37  | up   | 10.68 | 9.43  | Inc-LPGAT1 LNCipedia lc Inc-LPGAT1- NONHSAT0 chr1   | 2.12E+08 | 211674363 - |
| TC0100005450.oe.1 | -2.84 | -1.50 | 2.84  | down | 6.21  | 7.72  | Inc-GNG4-1 LNCipedia lc Inc-GNG4-1 NONHSAT0 chr1    | 2.36E+08 | 235549698 - |
| TC01000521.hg.4   | 2.81  | 1.49  | 2.81  | up   | 5.35  | 3.86  | SLFN1-AS1 SLFN1 antis --- chr1                      | 41014590 | 41043890 +  |
| TC01000721.hg.4   | 2.27  | 1.18  | 2.27  | up   | 5.44  | 4.26  | DLEU2L deleted in ly --- chr1                       | 63548964 | 63550636 +  |
| TC01002278.hg.4   | -2.46 | -1.30 | 2.46  | down | 3.84  | 5.14  | MST1//MST1 macrophage --- chr1                      | 16754906 | 16764480 -  |
| TC01002632.hg.4   | 2.23  | 1.16  | 2.23  | up   | 5.76  | 4.60  | FOXD2-AS1 FOXD2 antis --- chr1                      | 47432133 | 47434641 -  |
| TC01003327.hg.4   | 2.22  | 1.15  | 2.22  | up   | 4.70  | 3.55  | SCARNA4 small Cajal b --- chr1                      | 1.56E+08 | 155926086 - |
| TC01003969.hg.4   | -2.34 | -1.23 | 2.34  | down | 3.56  | 4.79  | SNRPD2P2 small nuclea --- chr1                      | 2.31E+08 | 231476525 - |
| TC01006390.hg.4   | 2.63  | 1.39  | 2.63  | up   | 9.64  | 8.25  | HNRNPU-A non-protein --- chr1                       | 2.45E+08 | 244846941 - |
| TC01006415.hg.4   | 2.78  | 1.47  | 2.78  | up   | 5.05  | 3.58  | RP11-267N1 regulator of --- chr1                    | 1.63E+08 | 163321894 - |
| TC0200000115.oe.1 | 2.04  | 1.03  | 2.04  | up   | 5.70  | 4.67  | Inc-RRM2-1 LNCipedia lc Inc-RRM2-1 --- chr2         | 10120734 | 10121065 +  |
| TC0200000226.oe.1 | 2.04  | 1.03  | 2.04  | up   | 5.41  | 4.38  | RP11-79O8 LNCipedia lc Inc-RHOB-1 --- chr2          | 19902025 | 19902569 +  |
| TC0200000245.oe.1 | 2.63  | 1.39  | 2.63  | up   | 6.06  | 4.67  | AC010872.1 N/A --- chr2                             | 21023496 | 21024170 +  |
| TC0200000468.oe.1 | 2.19  | 1.13  | 2.19  | up   | 6.18  | 5.04  | Inc-MTA3-7 NONCODE c Inc-MTA3-7 NONHSAT0 chr2       | 42317474 | 42320341 +  |
| TC0200000809.oe.1 | -2.04 | -1.03 | 2.04  | down | 3.41  | 4.44  | Inc-ALMS1- LNCipedia lc Inc-ALMS1- NONHSAT0 chr2    | 73640949 | 73641628 +  |
| TC0200000860.oe.1 | -2.16 | -1.11 | 2.16  | down | 6.35  | 7.46  | NONHSAGO LNCipedia lc Inc-POLR4- (NONHSAT0 chr2     | 75669989 | 75670454 +  |
| TC0200000971.oe.1 | -2.23 | -1.16 | 2.23  | down | 3.02  | 4.17  | Inc-AC2332 LNCipedia lc Inc-AC2332 (NONHSAT0 chr2   | 89862722 | 89862986 +  |
| TC0200001002.oe.1 | 2.67  | 1.42  | 2.67  | up   | 7.96  | 6.54  | Inc-AC0734 gene_id XLC Inc-AC0734: NONHSAT0 chr2    | 92085371 | 92106501 +  |
| TC0200001004.oe.1 | 2.31  | 1.21  | 2.31  | up   | 12.79 | 11.58 | Inc-AC0734: NONCODE c Inc-AC0734: NONHSAT0 chr2     | 92117808 | 92128237 +  |
| TC0200001005.oe.1 | 2.41  | 1.27  | 2.41  | up   | 6.43  | 5.16  | Inc-AC0734 LNCipedia lc Inc-AC0734: NONHSAT0 chr2   | 92130438 | 92136243 +  |
| TC0200001085.oe.1 | 2.05  | 1.03  | 2.05  | up   | 5.07  | 4.04  | Inc-LIPT1-1 NONCODE c Inc-LIPT1-1: NONHSAT0 chr2    | 99141950 | 99147490 +  |
| TC0200001130.oe.1 | -2.01 | -1.01 | 2.01  | down | 4.76  | 5.77  | Inc-TMEM1 NONCODE c Inc-TMEM1 NONHSAT0 chr2         | 1.03E+08 | 102686768 + |
| TC0200001131.oe.1 | -2.29 | -1.20 | 2.29  | down | 2.84  | 4.04  | Inc-TMEM1 LNCipedia lc Inc-TMEM1 NONHSAT0 chr2      | 1.03E+08 | 102702451 + |

|                   |       |       |      |      |       |       |                                                 |          |             |
|-------------------|-------|-------|------|------|-------|-------|-------------------------------------------------|----------|-------------|
| TC0200001322.oe.1 | -2.04 | -1.03 | 2.04 | down | 8.80  | 9.83  | lnc-INSIG2--NONCODE (lnc-INSIG2--NONHSAT0 chr2  | 1.18E+08 | 118110997 + |
| TC0200001450.oe.1 | -2.02 | -1.01 | 2.02 | down | 3.53  | 4.54  | lnc-PLEKHB2 LNCipedia lnc-PLEKHB2 --- chr2      | 1.31E+08 | 131362128 + |
| TC0200001598.oe.1 | 2.05  | 1.03  | 2.05 | up   | 3.98  | 2.95  | lnc-LYPD6-8 LNCipedia lnc-LYPD6-8 NONHSAT0 chr2 | 1.5E+08  | 149636840 + |
| TC0200001740.oe.1 | -2.40 | -1.26 | 2.40 | down | 5.51  | 6.77  | lnc-PHOSPH LNCipedia lnc-PHOSPH NONHSAT0 chr2   | 1.7E+08  | 169641403 + |
| TC0200001776.oe.1 | 2.22  | 1.15  | 2.22 | up   | 7.97  | 6.82  | lnc-METAP1 NONCODE (lnc-METAP1 NONHSAT0 chr2    | 1.72E+08 | 171923475 + |
| TC0200001834.oe.1 | 2.04  | 1.03  | 2.04 | up   | 5.53  | 4.50  | lnc-HNRNP7 LNCipedia lnc-HNRNP7 NONHSAT0 chr2   | 1.77E+08 | 177198547 + |
| TC0200001865.oe.1 | 2.35  | 1.23  | 2.35 | up   | 5.29  | 4.06  | lnc-PLEKHA1 LNCipedia lnc-PLEKHA1 NONHSAT0 chr2 | 1.79E+08 | 178550681 + |
| TC0200002088.oe.1 | -2.32 | -1.22 | 2.32 | down | 3.78  | 5.00  | lnc-NRP2-2 LNCipedia lnc-NRP2-2: NONHSAT0 chr2  | 2.06E+08 | 205618192 + |
| TC0200002150.oe.1 | -2.58 | -1.37 | 2.58 | down | 13.05 | 14.42 | lnc-RPE-11 LNCipedia lnc-RPE-11: NONHSAT0 chr2  | 2.11E+08 | 210606771 + |
| TC0200002152.oe.1 | -3.39 | -1.76 | 3.39 | down | 15.93 | 17.70 | lnc-RPE-13 NONCODE (lnc-RPE-13: NONHSAT0 chr2   | 2.11E+08 | 210663146 + |
| TC0200002307.oe.1 | -2.39 | -1.26 | 2.39 | down | 6.38  | 7.64  | lnc-KCNE4- LNCipedia lnc-KCNE4- NONHSAT0 chr2   | 2.23E+08 | 222944636 + |
| TC0200002339.oe.1 | 8.94  | 3.16  | 8.94 | up   | 11.81 | 8.65  | lnc-WDR69- NONCODE (lnc-WDR69- NONHSAT0 chr2    | 2.28E+08 | 227817463 + |
| TC0200002479.oe.1 | 2.07  | 1.05  | 2.07 | up   | 6.17  | 5.12  | lnc-PRLH-1 LNCipedia lnc-PRLH-1: NONHSAT0 chr2  | 2.38E+08 | 237517509 + |
| TC0200002687.oe.1 | -2.14 | -1.10 | 2.14 | down | 3.16  | 4.26  | lnc-MBOAT2 LNCipedia lnc-MBOAT2 NONHSAT0 chr2   | 8852690  | 8854246 -   |
| TC0200002711.oe.1 | 2.11  | 1.08  | 2.11 | up   | 12.54 | 11.46 | lnc-NOL10- LNCipedia lnc-NOL10- NONHSAT0 chr2   | 10444095 | 10448309 -  |
| TC0200002770.oe.1 | -2.32 | -1.21 | 2.32 | down | 3.11  | 4.32  | lnc-RDH14- LNCipedia lnc-RDH14- NONHSAT0 chr2   | 18423534 | 18425304 -  |
| TC0200003220.oe.1 | 2.41  | 1.27  | 2.41 | up   | 4.37  | 3.11  | lnc-USP34-8 LNCipedia lnc-USP34-8 --- chr2      | 60993208 | 60998496 -  |
| TC0200003241.oe.1 | 2.56  | 1.35  | 2.56 | up   | 10.83 | 9.48  | lnc-FAM161 NONCODE (lnc-FAM161 NONHSAT0 chr2    | 61887948 | 61888458 -  |
| TC0200003555.oe.1 | 2.32  | 1.22  | 2.32 | up   | 6.14  | 4.92  | lnc-KRCC1-2 NONCODE (lnc-KRCC1-2: NONHSAT0 chr2 | 88123029 | 88128059 -  |
| TC0200003632.oe.1 | 2.27  | 1.18  | 2.27 | up   | 7.96  | 6.77  | lnc-GPAT2-1 LNCipedia lnc-GPAT2-1 --- chr2      | 95891657 | 95896022 -  |
| TC0200003671.oe.1 | 2.40  | 1.26  | 2.40 | up   | 5.00  | 3.74  | lnc-ACTR1B NONCODE (lnc-ACTR1B NONHSAT0 chr2    | 97523949 | 97524976 -  |
| TC0200003672.oe.1 | 3.91  | 1.97  | 3.91 | up   | 7.07  | 5.10  | lnc-ACTR1B NONCODE (lnc-ACTR1B NONHSAT0 chr2    | 97548007 | 97550242 -  |
| TC0200003708.oe.1 | 2.02  | 1.01  | 2.02 | up   | 5.39  | 4.37  | lnc-TBC1D8 LNCipedia lnc-TBC1D8 NONHSAT0 chr2   | 1.01E+08 | 101294662 - |
| TC0200003727.oe.1 | -2.21 | -1.15 | 2.21 | down | 3.11  | 4.26  | lnc-MFSD9- LNCipedia lnc-MFSD9- --- chr2        | 1.03E+08 | 103486916 - |
| TC0200003810.oe.1 | 2.20  | 1.13  | 2.20 | up   | 8.81  | 7.68  | lnc-RGPD6- LNCipedia lnc-RGPD6- NONHSAT0 chr2   | 1.11E+08 | 110650739 - |
| TC0200003811.oe.1 | 2.92  | 1.54  | 2.92 | up   | 12.82 | 11.27 | lnc-RGPD6- LNCipedia lnc-RGPD6- NONHSAT0 chr2   | 1.11E+08 | 110667565 - |
| TC0200003860.oe.1 | -3.25 | -1.70 | 3.25 | down | 7.46  | 9.16  | lnc-AC0167- NONCODE (lnc-AC0167- NONHSAT0 chr2  | 1.14E+08 | 113710239 - |
| TC0200004166.oe.1 | -2.00 | -1.00 | 2.00 | down | 2.67  | 3.67  | lnc-RPRM-6 LNCipedia lnc-RPRM-6 NONHSAT0 chr2   | 1.54E+08 | 153762646 - |
| TC0200004364.oe.1 | -2.12 | -1.08 | 2.12 | down | 8.58  | 9.66  | lnc-CHN1-5 NONCODE (lnc-CHN1-5 NONHSAT0 chr2    | 1.75E+08 | 175074044 - |
| TC0200004365.oe.1 | 2.21  | 1.15  | 2.21 | up   | 8.50  | 7.36  | lnc-CHN1-6 LNCipedia lnc-CHN1-6 NONHSAT0 chr2   | 1.75E+08 | 175093254 - |
| TC0200004398.oe.1 | 2.40  | 1.26  | 2.40 | up   | 10.43 | 9.17  | lnc-TTC30B- LNCipedia lnc-TTC30B- NONHSAT0 chr2 | 1.77E+08 | 177229506 - |
| TC0200004462.oe.1 | -3.58 | -1.84 | 3.58 | down | 8.57  | 10.41 | lnc-CALCRL LNCipedia lnc-CALCRL NONHSAT0 chr2   | 1.87E+08 | 187466042 - |
| TC0200004490.oe.1 | 2.16  | 1.11  | 2.16 | up   | 4.69  | 3.58  | lnc-STAT1-1 LNCipedia lnc-STAT1-1 --- chr2      | 1.91E+08 | 190935288 - |
| TC0200004662.oe.1 | -2.26 | -1.17 | 2.26 | down | 8.68  | 9.86  | lnc-PECR-1 LNCipedia lnc-PECR-1: NONHSAT0 chr2  | 2.16E+08 | 216082955 - |
| TC0200004680.oe.1 | -2.92 | -1.55 | 2.92 | down | 4.98  | 6.52  | lnc-DIRC3-4 NONCODE (lnc-DIRC3-4 NONHSAT0 chr2  | 2.18E+08 | 217810304 - |
| TC0200004681.oe.1 | -2.24 | -1.16 | 2.24 | down | 4.97  | 6.13  | lnc-DIRC3-5 LNCipedia lnc-DIRC3-5 NONHSAT0 chr2 | 2.18E+08 | 217815368 - |
| TC0300000084.oe.1 | 2.70  | 1.43  | 2.70 | up   | 4.86  | 3.43  | RP11-1020A LNCipedia lnc-IL17RC-: NONHSAT0 chr3 | 9935706  | 9936258 +   |
| TC0300000086.oe.1 | 2.98  | 1.57  | 2.98 | up   | 8.46  | 6.89  | lnc-CRELD1- NONCODE (lnc-CRELD1- NONHSAT0 chr3  | 9947404  | 9954787 +   |
| TC0300000119.oe.1 | 2.25  | 1.17  | 2.25 | up   | 5.15  | 3.98  | lnc-TSEN2-3 LNCipedia lnc-TSEN2-3 --- chr3      | 12558775 | 12560797 +  |
| TC0300000192.oe.1 | -2.82 | -1.50 | 2.82 | down | 5.99  | 7.48  | lnc-RAB5A-: NONCODE (lnc-RAB5A-: NONHSAT0 chr3  | 20111594 | 20122795 +  |
| TC0300000510.oe.1 | -2.04 | -1.03 | 2.04 | down | 3.03  | 4.05  | lnc-RBM5-1 LNCipedia lnc-RBM5-1 --- chr3        | 50086735 | 50086989 +  |
| TC0300000517.oe.1 | -3.50 | -1.81 | 3.50 | down | 6.65  | 8.46  | lnc-GNAI2-2 LNCipedia lnc-GNAI2-2 NONHSAT0 chr3 | 50205246 | 50220979 +  |
| TC0300000839.oe.1 | -2.76 | -1.46 | 2.76 | down | 4.81  | 6.27  | lnc-GPR128- NONCODE (lnc-GPR128- NONHSAT0 chr3  | 1.01E+08 | 100577065 + |
| TC0300000840.oe.1 | 2.60  | 1.38  | 2.60 | up   | 4.48  | 3.10  | lnc-TMEM45 LNCipedia lnc-TMEM45 NONHSAT0 chr3   | 1.01E+08 | 100637575 + |
| TC0300000943.oe.1 | -2.02 | -1.01 | 2.02 | down | 3.34  | 4.35  | lnc-BOC-2 LNCipedia lnc-BOC-2:1 NONHSAT0 chr3   | 1.13E+08 | 113361319 + |
| TC0300001167.oe.1 | -2.63 | -1.39 | 2.63 | down | 5.13  | 6.53  | lnc-NEK11-1 LNCipedia lnc-NEK11-1 NONHSAT0 chr3 | 1.31E+08 | 131388824 + |
| TC0300001292.oe.1 | 4.67  | 2.22  | 4.67 | up   | 10.68 | 8.46  | lnc-AC1070- NONCODE (lnc-AC1070- NONHSAT0 chr3  | 1.45E+08 | 145380795 + |
| TC0300001547.oe.1 | 2.31  | 1.21  | 2.31 | up   | 11.19 | 9.98  | lnc-FNDC3B NONCODE (lnc-FNDC3B NONHSAT0 chr3    | 1.73E+08 | 172806107 + |
| TC0300001548.oe.1 | 2.73  | 1.45  | 2.73 | up   | 9.33  | 7.88  | lnc-FNDC3B LNCipedia lnc-FNDC3B NONHSAT0 chr3   | 1.73E+08 | 172820311 + |

|                   |       |       |      |      |       |       |                        |                               |          |             |
|-------------------|-------|-------|------|------|-------|-------|------------------------|-------------------------------|----------|-------------|
| TC0300001586.oe.1 | -2.55 | -1.35 | 2.55 | down | 4.98  | 6.33  | Inc-ZNF639- LNCipedia  | lc Inc-ZNF639- NONHSAT0 chr3  | 1.79E+08 | 179237501 + |
| TC0300001614.oe.1 | 2.26  | 1.18  | 2.26 | up   | 7.44  | 6.27  | Inc-TTC14-5 NONCODE    | cl Inc-TTC14-5 NONHSAT0 chr3  | 1.81E+08 | 180971816 + |
| TC0300001656.oe.1 | 2.03  | 1.02  | 2.03 | up   | 13.80 | 12.78 | Inc-ECE2-3 LNCipedia   | lc Inc-ECE2-3:1 NONHSAT0 chr3 | 1.84E+08 | 184304011 + |
| TC0300001725.oe.1 | -2.82 | -1.50 | 2.82 | down | 7.30  | 8.80  | Inc-LPP-2 NONCODE      | cl Inc-LPP-2:1 NONHSAT0 chr3  | 1.89E+08 | 188890671 + |
| TC0300001791.oe.1 | 2.08  | 1.06  | 2.08 | up   | 6.33  | 5.27  | Inc-MUC20- LNCipedia   | lc Inc-MUC20- --- chr3        | 1.96E+08 | 195610974 + |
| TC0300001889.oe.1 | 4.59  | 2.20  | 4.59 | up   | 6.71  | 4.52  | NONHSAG0 NONCODE       | cl Inc-AC0188: NONHSAT0 chr3  | 5156905  | 5188298 -   |
| TC0300002070.oe.1 | -2.13 | -1.09 | 2.13 | down | 4.12  | 5.21  | Inc-AC1035 NONCODE     | cl Inc-AC1035: NONHSAT0 chr3  | 25764129 | 25784156 -  |
| TC0300002078.oe.1 | 2.11  | 1.08  | 2.11 | up   | 6.89  | 5.81  | Inc-NEK10-2 LNCipedia  | lc Inc-NEK10-2 NONHSAT0 chr3  | 27397865 | 27401044 -  |
| TC0300002080.oe.1 | 2.27  | 1.18  | 2.27 | up   | 8.17  | 6.99  | Inc-NEK10-4 LNCipedia  | lc Inc-NEK10-4 NONHSAT0 chr3  | 27421672 | 27424502 -  |
| TC0300002219.oe.1 | 2.01  | 1.00  | 2.01 | up   | 5.01  | 4.00  | Inc-ZNF445- LNCipedia  | lc Inc-ZNF445- --- chr3       | 44396137 | 44399039 -  |
| TC0300002376.oe.1 | 2.28  | 1.19  | 2.28 | up   | 10.24 | 9.05  | Inc-ABHD14 NONCODE     | cl Inc-ABHD14 NONHSAT0 chr3   | 51994935 | 51995895 -  |
| TC0300002559.oe.1 | -2.45 | -1.29 | 2.45 | down | 11.98 | 13.27 | Inc-ZNF717- LNCipedia  | lc Inc-ZNF717- NONHSAT0 chr3  | 78600113 | 78607289 -  |
| TC0300002569.oe.1 | -2.93 | -1.55 | 2.93 | down | 10.41 | 11.95 | Inc-ROBO1- LNCipedia   | lc Inc-ROBO1- NONHSAT0 chr3   | 81654579 | 81670982 -  |
| TC0300002663.oe.1 | 2.51  | 1.33  | 2.51 | up   | 9.06  | 7.73  | Inc-KIAA152 LNCipedia  | lc Inc-KIAA152 NONHSAT0 chr3  | 1.09E+08 | 108589644 - |
| TC0300002763.oe.1 | 2.23  | 1.16  | 2.23 | up   | 6.77  | 5.61  | Inc-HCLS1-1 LNCipedia  | lc Inc-HCLS1-1 NONHSAT0 chr3  | 1.22E+08 | 12153210 -  |
| TC0300002790.oe.1 | 3.99  | 2.00  | 3.99 | up   | 10.95 | 8.95  | Inc-ITGB5-2 LNCipedia  | lc Inc-ITGB5-2 NONHSAT0 chr3  | 1.25E+08 | 124927771 - |
| TC0300002892.oe.1 | 2.46  | 1.30  | 2.46 | up   | 9.14  | 7.84  | Inc-RAB6B-2 NONCODE    | cl Inc-RAB6B-2 NONHSAT0 chr3  | 1.34E+08 | 133617526 - |
| TC0300002930.oe.1 | 2.52  | 1.33  | 2.52 | up   | 4.61  | 3.28  | RP11-461M2 LNCipedia   | lc Inc-DZIP1L- --- chr3       | 1.38E+08 | 138005122 - |
| TC0300002981.oe.1 | -2.03 | -1.02 | 2.03 | down | 8.60  | 9.62  | Inc-PAQR9- NONCODE     | cl Inc-PAQR9- NONHSAT0 chr3   | 1.43E+08 | 142829855 - |
| TC0300002994.oe.1 | -3.11 | -1.64 | 3.11 | down | 12.29 | 13.93 | Inc-PLSCR4- NONCODE    | cl Inc-PLSCR4- NONHSAT0 chr3  | 1.46E+08 | 146071170 - |
| TC0300002995.oe.1 | -2.61 | -1.38 | 2.61 | down | 9.50  | 10.89 | Inc-PLSCR4- LNCipedia  | lc Inc-PLSCR4- NONHSAT0 chr3  | 1.46E+08 | 146073657 - |
| TC0300003172.oe.1 | 2.05  | 1.04  | 2.05 | up   | 6.13  | 5.10  | Inc-ZBBX-6 NONCODE     | cl Inc-ZBBX-6: NONHSAT0 chr3  | 1.67E+08 | 167183380 - |
| TC0300003194.oe.1 | -2.16 | -1.11 | 2.16 | down | 8.61  | 9.72  | Inc-LRRC31- NONCODE    | cl Inc-LRRC31- NONHSAT0 chr3  | 1.7E+08  | 170088850 - |
| TC0300003203.oe.1 | 2.63  | 1.40  | 2.63 | up   | 12.72 | 11.32 | Inc-RPL22L1 LNCipedia  | lc Inc-RPL22L1 NONHSAT0 chr3  | 1.71E+08 | 170908644 - |
| TC0300003206.oe.1 | -2.33 | -1.22 | 2.33 | down | 13.33 | 14.55 | Inc-TNIK-3 LNCipedia   | lc Inc-TNIK-3:1 NONHSAT0 chr3 | 1.71E+08 | 171007470 - |
| TC0300003226.oe.1 | 2.38  | 1.25  | 2.38 | up   | 5.67  | 4.41  | Inc-TNFSF10 LNCipedia  | lc Inc-TNFSF10 NONHSAT0 chr3  | 1.73E+08 | 172696135 - |
| TC0300003263.oe.1 | -2.64 | -1.40 | 2.64 | down | 7.88  | 9.28  | Inc-GNB4-1 LNCipedia   | lc Inc-GNB4-1 NONHSAT0 chr3   | 1.79E+08 | 179398177 - |
| TC0300003380.oe.1 | 2.34  | 1.23  | 2.34 | up   | 12.89 | 11.66 | Inc-CLDN1- NONCODE     | cl Inc-CLDN1- NONHSAT0 chr3   | 1.9E+08  | 189964121 - |
| TC0300003381.oe.1 | 2.30  | 1.20  | 2.30 | up   | 8.20  | 6.99  | Inc-CLDN1- LNCipedia   | lc Inc-CLDN1- NONHSAT0 chr3   | 1.9E+08  | 189983484 - |
| TC0300003386.oe.1 | 2.34  | 1.23  | 2.34 | up   | 3.83  | 2.60  | Inc-GMNC-: gene_id XLC | Inc-GMNC-: NONHSAT0 chr3      | 1.91E+08 | 190793594 - |
| TC03000082.hg.4   | 2.03  | 1.02  | 2.03 | up   | 4.76  | 3.73  | TPRXL tetra-peptid     | --- --- chr3                  | 13937307 | 14082811 +  |
| TC03000392.hg.4   | -2.30 | -1.20 | 2.30 | down | 2.96  | 4.17  | C3orf49 chromosome     | --- --- chr3                  | 63819362 | 63848636 +  |
| TC03000966.hg.4   | -2.05 | -1.03 | 2.05 | down | 2.64  | 3.68  | SOX2-OT SOX2 overla    | --- --- chr3                  | 1.81E+08 | 181790946 + |
| TC0400000003.oe.1 | -2.04 | -1.03 | 2.04 | down | 4.08  | 5.10  | CH17-262A2 N/A         | --- --- chr4                  | 149738   | 150317 +    |
| TC0400000257.oe.1 | 3.32  | 1.73  | 3.32 | up   | 9.08  | 7.34  | Inc-SOD3-1 LNCipedia   | lc Inc-SOD3-1 NONHSAT0 chr4   | 24328764 | 24333261 +  |
| TC0400000397.oe.1 | -2.48 | -1.31 | 2.48 | down | 7.97  | 9.28  | Inc-DCAF4L LNCipedia   | lc Inc-DCAF4L: NONHSAT0 chr4  | 41959142 | 41960556 +  |
| TC0400000442.oe.1 | 4.90  | 2.29  | 4.90 | up   | 6.85  | 4.56  | Inc-CWH43- NONCODE     | cl Inc-CWH43- NONHSAT0 chr4   | 49579833 | 49580189 +  |
| TC0400000489.oe.1 | 2.05  | 1.03  | 2.05 | up   | 4.91  | 3.88  | Inc-EXOC1- LNCipedia   | lc Inc-EXOC1-: NONHSAT0 chr4  | 55962735 | 55963054 +  |
| TC0400000539.oe.1 | -2.27 | -1.18 | 2.27 | down | 3.73  | 4.91  | Inc-LPHN3- LNCipedia   | lc Inc-LPHN3- NONHSAT0 chr4   | 64608905 | 64609424 +  |
| TC0400000600.oe.1 | 2.18  | 1.12  | 2.18 | up   | 4.74  | 3.62  | Inc-AFM-2 NONCODE      | cl Inc-AFM-2:1 NONHSAT0 chr4  | 73453490 | 73455777 +  |
| TC0400000606.oe.1 | 3.31  | 1.73  | 3.31 | up   | 11.24 | 9.51  | Inc-CXCL6-2 LNCipedia  | lc Inc-CXCL6-2 NONHSAT0 chr4  | 73740569 | 73741986 +  |
| TC0400000607.oe.1 | 5.25  | 2.39  | 5.25 | up   | 12.53 | 10.13 | Inc-CXCL6-3 LNCipedia  | lc Inc-CXCL6-3 NONHSAT0 chr4  | 73743139 | 73743351 +  |
| TC0400000616.oe.1 | -2.11 | -1.07 | 2.11 | down | 9.94  | 11.02 | Inc-EPGN-3 NONCODE     | cl Inc-EPGN-3 NONHSAT0 chr4   | 74365173 | 74382013 +  |
| TC0400000617.oe.1 | -2.29 | -1.19 | 2.29 | down | 11.36 | 12.55 | Inc-AREG-1 NONCODE     | cl Inc-AREG-1: NONHSAT0 chr4  | 74382423 | 74384952 +  |
| TC0400000618.oe.1 | -2.53 | -1.34 | 2.53 | down | 10.51 | 11.85 | Inc-EREG-1 NONCODE     | cl Inc-EREG-1: NONHSAT0 chr4  | 74448639 | 74450532 +  |
| TC0400000688.oe.1 | -2.64 | -1.40 | 2.64 | down | 8.82  | 10.22 | Inc-COPS4- LNCipedia   | lc Inc-COPS4- NONHSAT0 chr4   | 83088777 | 83089241 +  |
| TC0400000737.oe.1 | 2.02  | 1.01  | 2.02 | up   | 5.40  | 4.38  | Inc-MMRN1 LNCipedia    | lc Inc-MMRN1 NONHSAT0 chr4    | 90312960 | 90468622 +  |
| TC0400000842.oe.1 | -2.40 | -1.27 | 2.40 | down | 3.86  | 5.13  | Inc-CCDC10 LNCipedia   | lc Inc-CCDC10 --- chr4        | 1.1E+08  | 109692703 + |
| TC0400001288.oe.1 | -2.24 | -1.16 | 2.24 | down | 6.13  | 7.29  | Inc-PALLD-5 NONCODE    | cl Inc-PALLD-5 NONHSAT0 chr4  | 1.7E+08  | 169723183 + |

|                   |       |       |      |      |       |       |                       |                          |      |          |           |   |
|-------------------|-------|-------|------|------|-------|-------|-----------------------|--------------------------|------|----------|-----------|---|
| TC0400001679.oe.1 | -2.15 | -1.11 | 2.15 | down | 8.54  | 9.64  | Inc-FGFBP2- LNCipedia | lc Inc-FGFBP2- NONHSAT0  | chr4 | 15985511 | 15986037  | - |
| TC0400001815.oe.1 | -2.32 | -1.21 | 2.32 | down | 8.41  | 9.62  | Inc-APBB2- LNCipedia  | lc Inc-APBB2- NONHSAT0   | chr4 | 40432703 | 40466645  | - |
| TC0400001834.oe.1 | -2.67 | -1.42 | 2.67 | down | 4.46  | 5.87  | Inc-BEND4- LNCipedia  | lc Inc-BEND4- NONHSAT0   | chr4 | 42412975 | 42415147  | - |
| TC0400001865.oe.1 | -2.57 | -1.36 | 2.57 | down | 2.67  | 4.03  | Inc-OCIAD2 NONCODE    | lc Inc-OCIAD2 NONHSAT0   | chr4 | 48852008 | 48860203  | - |
| TC0400001868.oe.1 | 2.03  | 1.02  | 2.03 | up   | 4.66  | 3.63  | Inc-OCIAD2 LNCipedia  | lc Inc-OCIAD2 NONHSAT0   | chr4 | 49212251 | 49212624  | - |
| TC0400002012.oe.1 | 2.14  | 1.10  | 2.14 | up   | 7.85  | 6.76  | Inc-CXCL5-1 LNCipedia | lc Inc-CXCL5-1 NONHSAT0  | chr4 | 73995642 | 73996738  | - |
| TC0400002101.oe.1 | -2.07 | -1.05 | 2.07 | down | 2.51  | 3.56  | Inc-PLAC8-1 LNCipedia | lc Inc-PLAC8-1 ---       | chr4 | 83058642 | 83059578  | - |
| TC0400002157.oe.1 | -2.22 | -1.15 | 2.22 | down | 5.25  | 6.40  | Inc-NAP1L5 NONCODE    | lc Inc-NAP1L5 NONHSAT0   | chr4 | 88732122 | 88737639  | - |
| TC0400002166.oe.1 | 2.02  | 1.01  | 2.02 | up   | 8.99  | 7.98  | Inc-RP11-7f LNCipedia | lc Inc-RP11-7f NONHSAT0  | chr4 | 90838501 | 90839112  | - |
| TC0400002203.oe.1 | -2.00 | -1.00 | 2.00 | down | 6.54  | 7.55  | NONHSAG0 LNCipedia    | lc Inc-ADH1A- NONHSAT0   | chr4 | 99215795 | 99219246  | - |
| TC0400002231.oe.1 | 2.30  | 1.20  | 2.30 | up   | 9.35  | 8.15  | Inc-UBE2D3 LNCipedia  | lc Inc-UBE2D3 NONHSAT0   | chr4 | 1.03E+08 | 102730171 | - |
| TC0400002241.oe.1 | 2.26  | 1.18  | 2.26 | up   | 9.50  | 8.32  | Inc-BDH2-3 LNCipedia  | lc Inc-BDH2-3 NONHSAT0   | chr4 | 1.03E+08 | 103140407 | - |
| TC0400002242.oe.1 | 2.09  | 1.07  | 2.09 | up   | 8.46  | 7.40  | Inc-BDH2-4 NONCODE    | lc Inc-BDH2-4 NONHSAT0   | chr4 | 1.03E+08 | 103145781 | - |
| TC0400002243.oe.1 | 2.06  | 1.04  | 2.06 | up   | 8.04  | 7.00  | Inc-BDH2-5 LNCipedia  | lc Inc-BDH2-5 NONHSAT0   | chr4 | 1.03E+08 | 103181963 | - |
| TC0400002290.oe.1 | -2.79 | -1.48 | 2.79 | down | 5.75  | 7.23  | Inc-CASP6-1 LNCipedia | lc Inc-CASP6-1 NONHSAT0  | chr4 | 1.1E+08  | 109712045 | - |
| TC0400002313.oe.1 | 2.46  | 1.30  | 2.46 | up   | 6.99  | 5.69  | Inc-NEUROC NONCODE    | lc Inc-NEUROC NONHSAT0   | chr4 | 1.13E+08 | 112623977 | - |
| TC0400002360.oe.1 | 2.14  | 1.10  | 2.14 | up   | 8.52  | 7.42  | Inc-PDE5A- LNCipedia  | lc Inc-PDE5A- NONHSAT0   | chr4 | 1.2E+08  | 120061036 | - |
| TC0400002645.oe.1 | -2.14 | -1.10 | 2.14 | down | 3.24  | 4.34  | Inc-TMEM1f LNCipedia  | lc Inc-TMEM1f ---        | chr4 | 1.65E+08 | 165071004 | - |
| TC0400002706.oe.1 | -2.12 | -1.08 | 2.12 | down | 3.03  | 4.11  | NONHSAG0 NONCODE      | lc Inc-FBXO8-1 NONHSAT0  | chr4 | 1.74E+08 | 174154637 | - |
| TC0400002735.oe.1 | 2.19  | 1.13  | 2.19 | up   | 9.09  | 7.96  | Inc-AGA-4 gene_id XLC | Inc-AGA-4:1 NONHSAT0     | chr4 | 1.79E+08 | 179170221 | - |
| TC0400002844.oe.1 | 2.03  | 1.02  | 2.03 | up   | 3.81  | 2.80  | Inc-FRG2-1f LNCipedia | lc Inc-FRG2-1f ---       | chr4 | 1.9E+08  | 189704490 | - |
| TC040000297.hg.4  | 2.04  | 1.03  | 2.04 | up   | 9.84  | 8.81  | DANCR differentiat    | --- ---                  | chr4 | 52712430 | 52720351  | + |
| TC0500000029.oe.1 | 3.62  | 1.86  | 3.62 | up   | 8.79  | 6.93  | Inc-RP11-6f NONCODE   | lc Inc-RP11-6f NONHSAT0  | chr5 | 915928   | 917900    | + |
| TC0500000159.oe.1 | 2.90  | 1.53  | 2.90 | up   | 7.70  | 6.17  | Inc-MARCHf LNCipedia  | lc Inc-MARCHf NONHSAT1   | chr5 | 10250319 | 10254584  | + |
| TC0500000169.oe.1 | -3.17 | -1.66 | 3.17 | down | 6.85  | 8.52  | Inc-MARCHf LNCipedia  | lc Inc-MARCHf NONHSAT1   | chr5 | 10435770 | 10437849  | + |
| TC0500000322.oe.1 | -2.22 | -1.15 | 2.22 | down | 2.54  | 3.69  | NONHSAG0 LNCipedia    | lc Inc-NPR3-2 NONHSAT1   | chr5 | 33008628 | 33025724  | + |
| TC0500000387.oe.1 | -2.58 | -1.36 | 2.58 | down | 5.50  | 6.87  | Inc-C5orf51 LNCipedia | lc Inc-C5orf51 NONHSAT1  | chr5 | 41939298 | 41941570  | + |
| TC0500000419.oe.1 | -2.80 | -1.48 | 2.80 | down | 9.62  | 11.10 | Inc-AC1149 LNCipedia  | lc Inc-AC1149 NONHSAT1   | chr5 | 43644745 | 43645665  | + |
| TC0500000426.oe.1 | -2.75 | -1.46 | 2.75 | down | 7.56  | 9.02  | Inc-MRPS30 LNCipedia  | lc Inc-MRPS30 NONHSAT1   | chr5 | 44815219 | 44820428  | + |
| TC0500000598.oe.1 | 2.55  | 1.35  | 2.55 | up   | 13.33 | 11.98 | Inc-CENPH- LNCipedia  | lc Inc-CENPH- NONHSAT1   | chr5 | 69174926 | 69175546  | + |
| TC0500000599.oe.1 | 2.22  | 1.15  | 2.22 | up   | 11.43 | 10.28 | Inc-CENPH- LNCipedia  | lc Inc-CENPH- NONHSAT1   | chr5 | 69177061 | 69177697  | + |
| TC0500000610.oe.1 | -2.13 | -1.09 | 2.13 | down | 5.72  | 6.82  | Inc-GTF2H2f NONCODE   | lc Inc-GTF2H2f NONHSAT1  | chr5 | 69593473 | 69594723  | + |
| TC0500000645.oe.1 | 2.03  | 1.02  | 2.03 | up   | 9.05  | 8.03  | Inc-FCHO2- LNCipedia  | lc Inc-FCHO2- NONHSAT1   | chr5 | 72900874 | 72908913  | + |
| TC0500000679.oe.1 | 2.35  | 1.24  | 2.35 | up   | 15.91 | 14.68 | Inc-POLK-5 LNCipedia  | lc Inc-POLK-5 NONHSAT1   | chr5 | 75345599 | 75350821  | + |
| TC0500000680.oe.1 | 2.47  | 1.31  | 2.47 | up   | 13.24 | 11.94 | Inc-POLK-4 NONCODE    | lc Inc-POLK-4 NONHSAT1   | chr5 | 75354308 | 75355166  | + |
| TC0500000681.oe.1 | 2.44  | 1.29  | 2.44 | up   | 13.21 | 11.93 | Inc-POLK-3 LNCipedia  | lc Inc-POLK-3 NONHSAT1   | chr5 | 75355180 | 75356449  | + |
| TC0500000856.oe.1 | 2.19  | 1.13  | 2.19 | up   | 5.57  | 4.44  | Inc-ANKRD3 LNCipedia  | lc Inc-ANKRD3 NONHSAT1   | chr5 | 93594017 | 93594611  | + |
| TC0500000888.oe.1 | -2.05 | -1.04 | 2.05 | down | 3.15  | 4.19  | Inc-CAST-1f LNCipedia | lc Inc-CAST-1f NONHSAT1  | chr5 | 96211201 | 96212868  | + |
| TC0500000898.oe.1 | 2.16  | 1.11  | 2.16 | up   | 5.27  | 4.15  | Inc-CAST-5 LNCipedia  | lc Inc-CAST-5 NONHSAT1   | chr5 | 96777650 | 96779982  | + |
| TC0500000940.oe.1 | -3.07 | -1.62 | 3.07 | down | 8.72  | 10.34 | Inc-PIIP5K2 NONCODE   | lc Inc-PIIP5K2 NONHSAT1  | chr5 | 1.03E+08 | 103029267 | + |
| TC0500000946.oe.1 | 2.61  | 1.38  | 2.61 | up   | 4.56  | 3.18  | RP11-313L6 N/A        | --- ---                  | chr5 | 1.04E+08 | 104435499 | + |
| TC0500000964.oe.1 | -2.16 | -1.11 | 2.16 | down | 4.95  | 6.06  | Inc-MAN2A LNCipedia   | lc Inc-MAN2A NONHSAT1    | chr5 | 1.09E+08 | 109195058 | + |
| TC0500000982.oe.1 | 2.01  | 1.01  | 2.01 | up   | 6.47  | 5.46  | Inc-TSLP-2 LNCipedia  | lc Inc-TSLP-2:1 NONHSAT1 | chr5 | 1.11E+08 | 111095209 | + |
| TC0500001004.oe.1 | 2.15  | 1.10  | 2.15 | up   | 8.19  | 7.08  | Inc-ZRSR1-f LNCipedia | lc Inc-ZRSR1-f NONHSAT1  | chr5 | 1.13E+08 | 113008307 | + |
| TC0500001020.oe.1 | 2.82  | 1.49  | 2.82 | up   | 5.11  | 3.61  | Inc-AP3S1-f LNCipedia | lc Inc-AP3S1-f NONHSAT1  | chr5 | 1.16E+08 | 115579333 | + |
| TC0500001126.oe.1 | 2.19  | 1.13  | 2.19 | up   | 12.47 | 11.34 | Inc-SLC27Af LNCipedia | lc Inc-SLC27Af NONHSAT1  | chr5 | 1.28E+08 | 128182921 | + |
| TC0500001242.oe.1 | 2.87  | 1.52  | 2.87 | up   | 7.16  | 5.63  | Inc-WNT8A- NONCODE    | lc Inc-WNT8A- NONHSAT1   | chr5 | 1.38E+08 | 138181896 | + |
| TC0500001359.oe.1 | 2.16  | 1.11  | 2.16 | up   | 13.57 | 12.46 | Inc-POU4F3 LNCipedia  | lc Inc-POU4F3 NONHSAT1   | chr5 | 1.46E+08 | 146263519 | + |
| TC0500001502.oe.1 | 2.40  | 1.27  | 2.40 | up   | 9.13  | 7.86  | Inc-FABP6-4 LNCipedia | lc Inc-FABP6-4 NONHSAT1  | chr5 | 1.6E+08  | 160424777 | + |

|                   |       |       |      |      |       |       |                                                     |          |             |
|-------------------|-------|-------|------|------|-------|-------|-----------------------------------------------------|----------|-------------|
| TC0500001525.oe.1 | 4.21  | 2.08  | 4.21 | up   | 9.85  | 7.77  | Inc-CCNG1- NONCODE c Inc-CCNG1- NONHSAT1( chr5      | 1.63E+08 | 163469910 + |
| TC0500001562.oe.1 | 2.38  | 1.25  | 2.38 | up   | 4.49  | 3.23  | Inc-GABRP- LNCipedia lc Inc-GABRP- --- chr5         | 1.71E+08 | 170923847 + |
| TC0500001778.oe.1 | 2.51  | 1.33  | 2.51 | up   | 6.74  | 5.41  | Inc-ZDHC1 LNCipedia lc Inc-ZDHC1 NONHSAT0( chr5     | 767397   | 768931 -    |
| TC0500001831.oe.1 | -2.15 | -1.10 | 2.15 | down | 3.65  | 4.75  | Inc-MED10- NONCODE c Inc-MED10- NONHSAT1( chr5      | 5420759  | 5421806 -   |
| TC0500001902.oe.1 | 4.29  | 2.10  | 4.29 | up   | 5.45  | 3.35  | CTD-21990 LNCipedia lc Inc-FAM173 --- chr5          | 10203600 | 10204040 -  |
| TC0500002066.oe.1 | 2.18  | 1.12  | 2.18 | up   | 6.46  | 5.34  | RP11-12501 N/A --- chr5                             | 34124162 | 34124385 -  |
| TC0500002082.oe.1 | -2.07 | -1.05 | 2.07 | down | 7.31  | 8.37  | Inc-UGT3A2 LNCipedia lc Inc-UGT3A2 NONHSAT1( chr5   | 36098556 | 36102381 -  |
| TC0500002115.oe.1 | 2.00  | 1.00  | 2.00 | up   | 5.15  | 4.15  | Inc-AC0914 NONCODE c Inc-AC0914 NONHSAT1( chr5      | 38528672 | 38530917 -  |
| TC0500002128.oe.1 | 2.51  | 1.33  | 2.51 | up   | 5.27  | 3.94  | Inc-FYB-2 LNCipedia lc Inc-FYB-2:1 NONHSAT1( chr5   | 39374745 | 39376042 -  |
| TC0500002164.oe.1 | 2.03  | 1.02  | 2.03 | up   | 12.68 | 11.65 | Inc-CCL28-2 LNCipedia lc Inc-CCL28-2 NONHSAT1( chr5 | 43293734 | 43295857 -  |
| TC0500002168.oe.1 | 3.05  | 1.61  | 3.05 | up   | 7.52  | 5.91  | NONHSAG0 NONCODE c Inc-C5orf28 NONHSAT1( chr5       | 43490329 | 43494605 -  |
| TC0500002178.oe.1 | 2.17  | 1.12  | 2.17 | up   | 6.64  | 5.52  | Inc-EMB-6 LNCipedia lc Inc-EMB-6:1 NONHSAT1( chr5   | 50403256 | 50443248 -  |
| TC0500002201.oe.1 | 3.62  | 1.85  | 3.62 | up   | 6.60  | 4.74  | Inc-MOCS2- LNCipedia lc Inc-MOCS2- --- chr5         | 54011393 | 54011596 -  |
| TC0500002252.oe.1 | 2.29  | 1.19  | 2.29 | up   | 6.26  | 5.07  | Inc-PDE4D- NONCODE c Inc-PDE4D- NONHSAT1( chr5      | 60605684 | 60628691 -  |
| TC0500002412.oe.1 | -2.02 | -1.02 | 2.02 | down | 8.75  | 9.76  | Inc-WDR41- LNCipedia lc Inc-WDR41- NONHSAT1( chr5   | 77073640 | 77076544 -  |
| TC0500002460.oe.1 | 2.10  | 1.07  | 2.10 | up   | 11.06 | 9.99  | Inc-ANKRD3 NONCODE c Inc-ANKRD3 NONHSAT1( chr5      | 80628538 | 80654547 -  |
| TC0500002506.oe.1 | 2.33  | 1.22  | 2.33 | up   | 7.17  | 5.94  | NONHSAG0 NONCODE c Inc-AC0083 NONHSAT1( chr5        | 86380660 | 86381426 -  |
| TC0500002801.oe.1 | 2.39  | 1.26  | 2.39 | up   | 5.76  | 4.50  | Inc-C5orf63 LNCipedia lc Inc-C5orf63 NONHSAT1( chr5 | 1.27E+08 | 126914990 - |
| TC0500002872.oe.1 | -2.49 | -1.32 | 2.49 | down | 5.56  | 6.87  | Inc-SAR1B-1 LNCipedia lc Inc-SAR1B-1 NONHSAT1( chr5 | 1.35E+08 | 134727819 - |
| TC0500002915.oe.1 | 2.00  | 1.00  | 2.00 | up   | 7.56  | 6.55  | Inc-GFRA3- NONCODE l Inc-GFRA3- NONHSAT1( chr5      | 1.38E+08 | 138331087 - |
| TC0500003066.oe.1 | -2.68 | -1.42 | 2.68 | down | 5.30  | 6.72  | Inc-CSF1R-1 NONCODE c Inc-CSF1R-1 NONHSAT1( chr5    | 1.5E+08  | 150114958 - |
| TC0500003068.oe.1 | -2.28 | -1.19 | 2.28 | down | 4.87  | 6.05  | Inc-CSF1R-3 NONCODE c Inc-CSF1R-3 NONHSAT1( chr5    | 1.5E+08  | 150134110 - |
| TC0500003211.oe.1 | -2.22 | -1.15 | 2.22 | down | 9.08  | 10.23 | Inc-PANK3- LNCipedia lc Inc-PANK3- NONHSAT1( chr5   | 1.69E+08 | 168553727 - |
| TC0500003267.oe.1 | -2.41 | -1.27 | 2.41 | down | 9.44  | 10.71 | Inc-NKX2-5 NONCODE c Inc-NKX2-5 NONHSAT1( chr5      | 1.73E+08 | 173328447 - |
| TC05002121.hg.4   | -2.03 | -1.02 | 2.03 | down | 2.39  | 3.41  | GMCL1P1 germ cell-le: --- chr5                      | 1.78E+08 | 178187432 - |
| TC0600000269.oe.1 | 2.52  | 1.33  | 2.52 | up   | 7.44  | 6.10  | HULC//NON hepatocellul. Inc-BMP6-3 NONHSAT1( chr6   | 8652137  | 8657427 +   |
| TC0600000296.oe.1 | -2.71 | -1.44 | 2.71 | down | 6.10  | 7.54  | Inc-C6orf22 LNCipedia lc Inc-C6orf22 NONHSAT1( chr6 | 11136920 | 11138738 +  |
| TC0600000468.oe.1 | 2.58  | 1.37  | 2.58 | up   | 9.03  | 7.66  | Inc-PRSS16- LNCipedia lc Inc-PRSS16- NONHSAT1( chr6 | 27230398 | 27230655 +  |
| TC0600000483.oe.1 | -2.02 | -1.01 | 2.02 | down | 3.62  | 4.63  | Inc-HIST1H2 LNCipedia lc Inc-HIST1H2 NONHSAT1( chr6 | 27853720 | 27855804 +  |
| TC0600000802.oe.1 | -2.04 | -1.03 | 2.04 | down | 9.27  | 10.30 | Inc-RSPH9- LNCipedia lc Inc-RSPH9- NONHSAT1( chr6   | 43777720 | 43786439 +  |
| TC0600000888.oe.1 | 2.11  | 1.08  | 2.11 | up   | 10.70 | 9.62  | Inc-MLIP-2 NONCODE c Inc-MLIP-2: NONHSAT1( chr6     | 53919240 | 53920748 +  |
| TC0600000953.oe.1 | 2.33  | 1.22  | 2.33 | up   | 5.01  | 3.79  | Inc-C6orf57 LNCipedia lc Inc-C6orf57 NONHSAT1( chr6 | 70512115 | 70515953 +  |
| TC0600001041.oe.1 | 2.96  | 1.56  | 2.96 | up   | 13.87 | 12.31 | Inc-BCKDHB LNCipedia lc Inc-BCKDHB NONHSAT1( chr6   | 80005941 | 80011553 +  |
| TC0600001042.oe.1 | 2.77  | 1.47  | 2.77 | up   | 7.87  | 6.40  | Inc-BCKDHB NONCODE c Inc-BCKDHB NONHSAT1( chr6      | 80037553 | 80040271 +  |
| TC0600001091.oe.1 | 2.02  | 1.02  | 2.02 | up   | 8.65  | 7.63  | Inc-SLC35A1 LNCipedia lc Inc-SLC35A1 NONHSAT1( chr6 | 87650930 | 87653214 +  |
| TC0600001184.oe.1 | 3.18  | 1.67  | 3.18 | up   | 6.68  | 5.01  | RP3-467N11 LNCipedia lc Inc-GRIK2-2 NONHSAT1( chr6  | 1.01E+08 | 100882987 + |
| TC0600001244.oe.1 | -2.41 | -1.27 | 2.41 | down | 13.89 | 15.17 | Inc-LACE1-7 LNCipedia lc Inc-LACE1-7 --- chr6       | 1.09E+08 | 108681190 + |
| TC0600001254.oe.1 | 2.11  | 1.07  | 2.11 | up   | 4.39  | 3.32  | Inc-C6orf18 LNCipedia lc Inc-C6orf18: --- chr6      | 1.09E+08 | 109272805 + |
| TC0600001378.oe.1 | -2.20 | -1.14 | 2.20 | down | 7.47  | 8.61  | Inc-TPD52L1 LNCipedia lc Inc-TPD52L1 NONHSAT1( chr6 | 1.25E+08 | 125086338 + |
| TC0600001386.oe.1 | 2.21  | 1.15  | 2.21 | up   | 8.56  | 7.42  | Inc-HINT3-1 LNCipedia lc Inc-HINT3-1 NONHSAT1( chr6 | 1.26E+08 | 125998098 + |
| TC0600001396.oe.1 | -2.08 | -1.05 | 2.08 | down | 2.83  | 3.89  | Inc-RNF146- LNCipedia lc Inc-RNF146- NONHSAT1( chr6 | 1.27E+08 | 127155285 + |
| TC0600001422.oe.1 | 2.08  | 1.06  | 2.08 | up   | 5.86  | 4.80  | Inc-AKAP7- LNCipedia lc Inc-AKAP7- NONHSAT1( chr6   | 1.31E+08 | 131309274 + |
| TC0600001450.oe.1 | -2.13 | -1.09 | 2.13 | down | 3.07  | 4.16  | Inc-EYA4-2/ LNCipedia lc Inc-EYA4-2: --- chr6       | 1.34E+08 | 133541174 + |
| TC0600001488.oe.1 | 2.11  | 1.08  | 2.11 | up   | 11.36 | 10.28 | Inc-KIAA124 LNCipedia lc Inc-KIAA124 NONHSAT1( chr6 | 1.38E+08 | 137875744 + |
| TC0600001525.oe.1 | 2.27  | 1.18  | 2.27 | up   | 9.33  | 8.14  | Inc-VTA1-4 LNCipedia lc Inc-VTA1-4: NONHSAT1( chr6  | 1.42E+08 | 142408220 + |
| TC0600001534.oe.1 | -2.43 | -1.28 | 2.43 | down | 6.41  | 7.69  | Inc-PEX3-5 LNCipedia lc Inc-PEX3-5: NONHSAT1( chr6  | 1.43E+08 | 143187814 + |
| TC0600001550.oe.1 | -2.99 | -1.58 | 2.99 | down | 6.65  | 8.23  | Inc-UTRN-1 gene_id XLC Inc-UTRN-1 NONHSAT1( chr6    | 1.44E+08 | 144288184 + |
| TC0600001558.oe.1 | -2.74 | -1.45 | 2.74 | down | 7.76  | 9.21  | Inc-STX11-9 LNCipedia lc Inc-STX11-9 NONHSAT1( chr6 | 1.45E+08 | 144846822 + |
| TC0600001750.oe.1 | 3.49  | 1.80  | 3.49 | up   | 10.08 | 8.27  | CCR6//Inc-CC-C chemok Inc-CCR6-3: NONHSAT1( chr6    | 1.67E+08 | 167139141 + |

|                   |       |       |      |      |       |       |                        |                                |          |           |   |
|-------------------|-------|-------|------|------|-------|-------|------------------------|--------------------------------|----------|-----------|---|
| TC0600001869.oe.1 | 2.15  | 1.10  | 2.15 | up   | 4.04  | 2.94  | Inc-C6orf19! LNCipedia | lc Inc-C6orf19! NONHSAT1: chr6 | 1726935  | 1728872   | - |
| TC0600001872.oe.1 | 2.14  | 1.10  | 2.14 | up   | 4.93  | 3.83  | Inc-C6orf19! LNCipedia | lc Inc-C6orf19! NONHSAT1: chr6 | 1932246  | 1934181   | - |
| TC0600001874.oe.1 | 2.14  | 1.10  | 2.14 | up   | 4.23  | 3.13  | Inc-C6orf19! LNCipedia | lc Inc-C6orf19! NONHSAT1: chr6 | 1949255  | 1949744   | - |
| TC0600001882.oe.1 | 2.53  | 1.34  | 2.53 | up   | 4.77  | 3.43  | Inc-C6orf19! LNCipedia | lc Inc-C6orf19! NONHSAT1: chr6 | 2037478  | 2037967   | - |
| TC0600002032.oe.1 | 2.04  | 1.03  | 2.04 | up   | 4.00  | 2.97  | Inc-SSR1-1 LNCipedia   | lc Inc-SSR1-1: NONHSAT1: chr6  | 7373953  | 7389402   | - |
| TC0600002047.oe.1 | -2.04 | -1.03 | 2.04 | down | 4.03  | 5.06  | Inc-TFAP2A- NONCODE    | lc Inc-TFAP2A- NONHSAT1: chr6  | 9841932  | 9864115   | - |
| TC0600002088.oe.1 | 2.27  | 1.18  | 2.27 | up   | 6.15  | 4.96  | Inc-RANBP9 LNCipedia   | lc Inc-RANBP9 NONHSAT1: chr6   | 13572073 | 13574214  | - |
| TC0600002200.oe.1 | 2.34  | 1.23  | 2.34 | up   | 6.18  | 4.95  | Inc-HIST1H3 LNCipedia  | lc Inc-HIST1H3: chr6           | 26194270 | 26196134  | - |
| TC0600002213.oe.1 | 2.01  | 1.01  | 2.01 | up   | 6.01  | 5.00  | RP11-239L2 LNCipedia   | lc Inc-HIST1H2: chr6           | 27001208 | 27001648  | - |
| TC0600002229.oe.1 | -2.35 | -1.24 | 2.35 | down | 3.51  | 4.74  | Inc-HIST1H2 LNCipedia  | lc Inc-HIST1H2 NONHSAT1: chr6  | 27666983 | 27668148  | - |
| TC0600002375.oe.1 | -2.23 | -1.16 | 2.23 | down | 5.71  | 6.86  | Inc-HLA-DC LNCipedia   | lc Inc-HLA-DC NONHSAT1: chr6   | 32825415 | 32828345  | - |
| TC0600002515.oe.1 | -2.22 | -1.15 | 2.22 | down | 9.10  | 10.26 | Inc-MRPS18 NONCODE     | lc Inc-MRPS18 NONHSAT1: chr6   | 43624614 | 43625864  | - |
| TC0600002604.oe.1 | 2.92  | 1.55  | 2.92 | up   | 9.46  | 7.91  | Inc-DST-3 LNCipedia    | lc Inc-DST-3:1 NONHSAT1: chr6  | 56276529 | 56276796  | - |
| TC0600002605.oe.1 | -2.12 | -1.09 | 2.12 | down | 6.85  | 7.94  | RP3-445N2 LNCipedia    | lc Inc-DST-1:1 NONHSAT1: chr6  | 56331788 | 56332117  | - |
| TC0600002627.oe.1 | 2.16  | 1.11  | 2.16 | up   | 3.73  | 2.62  | Inc-RAB23-1 LNCipedia  | lc Inc-RAB23-1 NONHSAT1: chr6  | 58071720 | 58073134  | - |
| TC0600002637.oe.1 | 2.44  | 1.29  | 2.44 | up   | 9.16  | 7.87  | Inc-LGSN-3 LNCipedia   | lc Inc-LGSN-3: chr6            | 63436392 | 63440372  | - |
| TC0600002673.oe.1 | 2.22  | 1.15  | 2.22 | up   | 5.78  | 4.63  | Inc-MB21D1 LNCipedia   | lc Inc-MB21D1 NONHSAT1: chr6   | 73391038 | 73391767  | - |
| TC0600002853.oe.1 | 2.62  | 1.39  | 2.62 | up   | 4.41  | 3.02  | Inc-BVES-1 LNCipedia   | lc Inc-BVES-1: chr6            | 1.05E+08 | 105038269 | - |
| TC0600002878.oe.1 | 2.60  | 1.38  | 2.60 | up   | 6.75  | 5.37  | Inc-OSTM1- LNCipedia   | lc Inc-OSTM1- NONHSAT1: chr6   | 1.08E+08 | 107958042 | - |
| TC0600002993.oe.1 | -3.06 | -1.61 | 3.06 | down | 6.64  | 8.25  | RP3-425C14 LNCipedia   | lc Inc-SERINC1 NONHSAT1: chr6  | 1.22E+08 | 122439223 | - |
| TC0600003161.oe.1 | -2.22 | -1.15 | 2.22 | down | 5.47  | 6.62  | Inc-SF3B5-5 LNCipedia  | lc Inc-SF3B5-5 NONHSAT1: chr6  | 1.45E+08 | 144708497 | - |
| TC0600003166.oe.1 | 2.56  | 1.36  | 2.56 | up   | 5.15  | 3.80  | Inc-FBXO30 LNCipedia   | lc Inc-FBXO30 NONHSAT1: chr6   | 1.46E+08 | 145897422 | - |
| TC0600003289.oe.1 | 3.99  | 2.00  | 3.99 | up   | 16.94 | 14.94 | Inc-TCP1-5 LNCipedia   | lc Inc-TCP1-5: NONHSAT1: chr6  | 1.6E+08  | 159692650 | - |
| TC0600003306.oe.1 | -2.21 | -1.14 | 2.21 | down | 2.82  | 3.96  | Inc-LPA-2 LNCipedia    | lc Inc-LPA-2:1 NONHSAT1: chr6  | 1.61E+08 | 160817351 | - |
| TC0600003349.oe.1 | 2.06  | 1.04  | 2.06 | up   | 7.06  | 6.02  | Inc-PRR18-2 LNCipedia  | lc Inc-PRR18-2 NONHSAT1: chr6  | 1.66E+08 | 166240493 | - |
| TC0600003425.oe.1 | -2.16 | -1.11 | 2.16 | down | 5.79  | 6.90  | Inc-PSMB1- LNCipedia   | lc Inc-PSMB1- NONHSAT1: chr6   | 1.71E+08 | 170576937 | - |
| TC06001436.hg.4   | -2.27 | -1.18 | 2.27 | down | 4.89  | 6.07  | TOB2P1 transducer o    | lc --- chr6                    | 28215338 | 28218929  | - |
| TC0700000159.oe.1 | 6.74  | 2.75  | 6.74 | up   | 7.02  | 4.27  | Inc-ARL4A- LNCipedia   | lc Inc-ARL4A- NONHSAT1: chr7   | 12966846 | 12967172  | + |
| TC0700000160.oe.1 | 3.10  | 1.63  | 3.10 | up   | 7.53  | 5.90  | Inc-ARL4A- LNCipedia   | lc Inc-ARL4A-: chr7            | 13067916 | 13670674  | + |
| TC0700000164.oe.1 | 3.18  | 1.67  | 3.18 | up   | 7.75  | 6.08  | Inc-ARL4A- NONCODE     | lc Inc-ARL4A- NONHSAT1: chr7   | 14003297 | 14009679  | + |
| TC0700000251.oe.1 | 2.36  | 1.24  | 2.36 | up   | 5.83  | 4.59  | Inc-CCDC12 LNCipedia   | lc Inc-CCDC12 NONHSAT1: chr7   | 23474528 | 23475589  | + |
| TC0700000261.oe.1 | 2.04  | 1.03  | 2.04 | up   | 7.16  | 6.13  | Inc-NPY-3 LNCipedia    | lc Inc-NPY-3:1 chr7            | 24660137 | 24660535  | + |
| TC0700000283.oe.1 | 2.25  | 1.17  | 2.25 | up   | 6.17  | 5.00  | NONHSAGO LNCipedia     | lc Inc-EVX1-1: NONHSAT1: chr7  | 27095647 | 27100265  | + |
| TC0700000395.oe.1 | 2.20  | 1.14  | 2.20 | up   | 14.81 | 13.67 | Inc-EEDP1- NONCODE     | lc Inc-EEDP1- NONHSAT1: chr7   | 36403493 | 36417148  | + |
| TC0700000428.oe.1 | 2.19  | 1.13  | 2.19 | up   | 4.79  | 3.65  | Inc-CDK13- LNCipedia   | lc Inc-CDK13- NONHSAT1: chr7   | 39816549 | 39868140  | + |
| TC0700000604.oe.1 | 2.17  | 1.12  | 2.17 | up   | 10.02 | 8.91  | Inc-ZNF716- LNCipedia  | lc Inc-ZNF716- NONHSAT1: chr7  | 57490211 | 57496130  | + |
| TC0700000649.oe.1 | 2.23  | 1.16  | 2.23 | up   | 5.32  | 4.16  | Inc-ZNF138- LNCipedia  | lc Inc-ZNF138- NONHSAT1: chr7  | 64681133 | 64686885  | + |
| TC0700000661.oe.1 | 2.16  | 1.11  | 2.16 | up   | 5.17  | 4.06  | Inc-ZNF273- NONCODE    | lc Inc-ZNF273- NONHSAT1: chr7  | 65373838 | 65398699  | + |
| TC0700000782.oe.1 | -2.01 | -1.01 | 2.01 | down | 4.99  | 6.00  | Inc-MDH2-2 LNCipedia   | lc Inc-MDH2-2 NONHSAT1: chr7   | 76099440 | 76102834  | + |
| TC0700000812.oe.1 | 2.58  | 1.37  | 2.58 | up   | 6.59  | 5.22  | Inc-RSBN1L- LNCipedia  | lc Inc-RSBN1L- chr7            | 77618632 | 77618950  | + |
| TC0700000833.oe.1 | -2.88 | -1.52 | 2.88 | down | 4.44  | 5.96  | Inc-CD36-3 LNCipedia   | lc Inc-CD36-3: NONHSAT1: chr7  | 80218678 | 80219288  | + |
| TC0700000928.oe.1 | 2.18  | 1.12  | 2.18 | up   | 6.07  | 4.94  | Inc-ASB4-2 gene_id XLC | lc Inc-ASB4-2: NONHSAT1: chr7  | 95440011 | 95442401  | + |
| TC0700001287.oe.1 | 2.57  | 1.36  | 2.57 | up   | 4.26  | 2.90  | Inc-CPA1-3 NONCODE     | lc Inc-CPA1-3: NONHSAT1: chr7  | 1.3E+08  | 130501069 | + |
| TC0700001309.oe.1 | 2.12  | 1.08  | 2.12 | up   | 6.96  | 5.87  | Inc-AC0093 LNCipedia   | lc Inc-AC0093 NONHSAT1: chr7   | 1.33E+08 | 133254018 | + |
| TC0700001320.oe.1 | 5.13  | 2.36  | 5.13 | up   | 6.07  | 3.71  | Inc-AKR1B1( NONCODE    | lc Inc-AKR1B1( NONHSAT1: chr7  | 1.35E+08 | 134541408 | + |
| TC0700001375.oe.1 | -4.81 | -2.27 | 4.81 | down | 5.45  | 7.72  | Inc-TTC26-3 LNCipedia  | lc Inc-TTC26-3: chr7           | 1.39E+08 | 139024456 | + |
| TC0700001506.oe.1 | 5.18  | 2.37  | 5.18 | up   | 5.81  | 3.43  | OTTHUMG0 LNCipedia     | lc Inc-LRRC61- NONHSAT1: chr7  | 1.5E+08  | 150342607 | + |
| TC0700001614.oe.1 | 2.06  | 1.04  | 2.06 | up   | 6.70  | 5.65  | Inc-DNAJB6 LNCipedia   | lc Inc-DNAJB6 chr7             | 1.57E+08 | 157196338 | + |
| TC0700001764.oe.1 | 2.62  | 1.39  | 2.62 | up   | 5.37  | 3.99  | Inc-RPA3-7 LNCipedia   | lc Inc-RPA3-7: NONHSAT1: chr7  | 8218441  | 8218951   | - |

|                   |       |       |      |      |       |       |                                                       |          |             |
|-------------------|-------|-------|------|------|-------|-------|-------------------------------------------------------|----------|-------------|
| TC0700001846.oe.1 | 2.17  | 1.11  | 2.17 | up   | 4.93  | 3.82  | lnc-STEAP1E NONCODE c lnc-STEAP1E NONHSAT1: chr7      | 22214433 | 22215408 -  |
| TC0700001904.oe.1 | 2.51  | 1.33  | 2.51 | up   | 5.60  | 4.27  | CTB-119C2: NONCODE c lnc-HNRNP: NONHSAT1: chr7        | 26173533 | 26185341 -  |
| TC0700002006.oe.1 | -2.12 | -1.08 | 2.12 | down | 2.85  | 3.93  | lnc-ELMO1- LNCipedia lc lnc-ELMO1- NONHSAT1: chr7     | 36623190 | 36661300 -  |
| TC0700002072.oe.1 | 2.23  | 1.15  | 2.23 | up   | 5.63  | 4.47  | lnc-MYL7-1 NONCODE c lnc-MYL7-1: NONHSAT1: chr7       | 44122088 | 44123496 -  |
| TC0700002082.oe.1 | 2.47  | 1.30  | 2.47 | up   | 9.51  | 8.21  | lnc-TMED4- NONCODE c lnc-TMED4- NONHSAT1: chr7        | 44569752 | 44570765 -  |
| TC0700002096.oe.1 | -3.15 | -1.65 | 3.15 | down | 15.95 | 17.60 | lnc-AC0112: LNCipedia lc lnc-AC0112: NONHSAT1: chr7   | 45913773 | 45915325 -  |
| TC0700002167.oe.1 | 2.24  | 1.16  | 2.24 | up   | 7.26  | 6.10  | lnc-RP4-72E NONCODE c lnc-RP4-72E NONHSAT1: chr7      | 56421857 | 56448375 -  |
| TC0700002400.oe.1 | -2.33 | -1.22 | 2.33 | down | 5.46  | 6.68  | lnc-C7orf23- NONCODE c lnc-C7orf23- NONHSAT1: chr7    | 86891195 | 86892935 -  |
| TC0700002443.oe.1 | 2.04  | 1.03  | 2.04 | up   | 3.62  | 2.59  | lnc-SAMD9L NONCODE c lnc-SAMD9L NONHSAT1: chr7        | 93145606 | 93148369 -  |
| TC0700002508.oe.1 | 3.11  | 1.64  | 3.11 | up   | 11.00 | 9.36  | lnc-GATS-1 LNCipedia lc lnc-GATS-1: --- chr7          | 1E+08    | 100310676 - |
| TC0700002786.oe.1 | -2.00 | -1.00 | 2.00 | down | 2.47  | 3.47  | lnc-SLC35B4 LNCipedia lc lnc-SLC35B4 NONHSAT1: chr7   | 1.34E+08 | 133733595 - |
| TC0700002808.oe.1 | 2.79  | 1.48  | 2.79 | up   | 10.49 | 9.01  | lnc-PTN-9 LNCipedia lc lnc-PTN-9:1 NONHSAT1: chr7     | 1.37E+08 | 136938553 - |
| TC0700002812.oe.1 | -2.35 | -1.23 | 2.35 | down | 2.98  | 4.22  | lnc-PTN-4 LNCipedia lc lnc-PTN-4:1 NONHSAT1: chr7     | 1.37E+08 | 137204840 - |
| TC07000084.hg.4   | 2.08  | 1.05  | 2.08 | up   | 3.08  | 2.02  | PER4 period circac --- --- chr7                       | 9634270  | 9635817 +   |
| TC07000398.hg.4   | 2.04  | 1.03  | 2.04 | up   | 8.16  | 7.13  | CCT6P1 chaperonin c --- --- chr7                      | 65751105 | 65763675 +  |
| TC07001489.hg.4   | 2.74  | 1.45  | 2.74 | up   | 9.10  | 7.65  | STAG3L1//Tl stromal antiç --- --- chr7                | 72968116 | 73005925 -  |
| TC07001513.hg.4   | 2.31  | 1.21  | 2.31 | up   | 8.95  | 7.74  | STAG3L1//S` stromal antiç --- --- chr7                | 74697974 | 74890612 -  |
| TC07003297.hg.4   | 2.06  | 1.04  | 2.06 | up   | 5.61  | 4.57  | NSUN5P1//^ NOP2/Sun d --- --- chr7                    | 72948293 | 72954790 -  |
| TC07003331.hg.4   | 2.95  | 1.56  | 2.95 | up   | 10.35 | 8.79  | STAG3L1//S` stromal antiç --- --- chr7                | 75359175 | 75390545 +  |
| TC0800000109.oe.1 | 2.16  | 1.11  | 2.16 | up   | 6.60  | 5.48  | NONHSAGO NONCODE c lnc-C8orf49- NONHSAT1: chr8        | 11761256 | 11763223 +  |
| TC0800000111.oe.1 | 2.06  | 1.04  | 2.06 | up   | 7.19  | 6.14  | lnc-NEIL2-2 LNCipedia lc lnc-NEIL2-2 NONHSAT1: chr8   | 11802784 | 11803815 +  |
| TC0800000135.oe.1 | -2.10 | -1.07 | 2.10 | down | 11.21 | 12.28 | lnc-EFHA2-: NONCODE c lnc-EFHA2-: NONHSAT1: chr8      | 15673763 | 15764460 +  |
| TC0800000148.oe.1 | -2.51 | -1.33 | 2.51 | down | 7.95  | 9.28  | lnc-ZDHHC2 LNCipedia lc lnc-ZDHHC2 NONHSAT1: chr8     | 17223542 | 17225779 +  |
| TC0800000150.oe.1 | -2.10 | -1.07 | 2.10 | down | 6.50  | 7.57  | lnc-VPS37A- NONCODE c lnc-VPS37A- NONHSAT1: chr8      | 17295964 | 17302427 +  |
| TC0800000155.oe.1 | -5.66 | -2.50 | 5.66 | down | 9.04  | 11.54 | lnc-PDGFR1 LNCipedia lc lnc-PDGFR1 NONHSAT1: chr8     | 17569140 | 17570516 +  |
| TC0800000192.oe.1 | -2.01 | -1.01 | 2.01 | down | 3.46  | 4.47  | lnc-ATP6V1f LNCipedia lc lnc-ATP6V1f --- chr8         | 20997906 | 21013196 +  |
| TC0800000393.oe.1 | -2.23 | -1.16 | 2.23 | down | 3.46  | 4.62  | lnc-EIF4EBP: NONCODE c lnc-EIF4EBP: NONHSAT1: chr8    | 38062881 | 38063791 +  |
| TC0800000444.oe.1 | 2.21  | 1.15  | 2.21 | up   | 7.34  | 6.19  | lnc-GOLGA7 NONCODE c lnc-GOLGA7 NONHSAT1: chr8        | 41529230 | 41544722 +  |
| TC0800000484.oe.1 | 3.41  | 1.77  | 3.41 | up   | 5.96  | 4.19  | lnc-LINC002 LNCipedia lc lnc-LINC002 NONHSAT1: chr8   | 45928884 | 45929667 +  |
| TC0800000501.oe.1 | 2.24  | 1.17  | 2.24 | up   | 4.72  | 3.56  | lnc-UBE2V2- NONCODE c lnc-UBE2V2- NONHSAT1: chr8      | 47960949 | 47962149 +  |
| TC0800000953.oe.1 | -2.05 | -1.04 | 2.05 | down | 2.59  | 3.62  | lnc-RIMS2-1 LNCipedia lc lnc-RIMS2-1 --- chr8         | 1.03E+08 | 103498670 + |
| TC0800000970.oe.1 | 2.17  | 1.12  | 2.17 | up   | 4.90  | 3.79  | lnc-ZFPM2- LNCipedia lc lnc-ZFPM2- NONHSAT1: chr8     | 1.07E+08 | 106742484 + |
| TC0800001057.oe.1 | 2.00  | 1.00  | 2.00 | up   | 9.75  | 8.75  | lnc-FER1L6- NONCODE c lnc-FER1L6- NONHSAT1: chr8      | 1.24E+08 | 123812760 + |
| TC0800001215.oe.1 | 2.18  | 1.12  | 2.18 | up   | 4.70  | 3.58  | lnc-GML-3 NONCODE c lnc-GML-3:1 NONHSAT1: chr8        | 1.43E+08 | 142965501 + |
| TC0800001293.oe.1 | 2.04  | 1.03  | 2.04 | up   | 5.64  | 4.61  | lnc-C8orf42- LNCipedia lc lnc-C8orf42- NONHSAT1: chr8 | 451917   | 453183 -    |
| TC0800001513.oe.1 | -2.16 | -1.11 | 2.16 | down | 9.06  | 10.17 | lnc-PHYHIP- NONCODE c lnc-PHYHIP- NONHSAT1: chr8      | 22419549 | 22422679 -  |
| TC0800001738.oe.1 | -2.16 | -1.11 | 2.16 | down | 8.40  | 9.52  | lnc-RP11-3E LNCipedia lc lnc-RP11-3E NONHSAT1: chr8   | 46614286 | 46617356 -  |
| TC0800001809.oe.1 | 2.25  | 1.17  | 2.25 | up   | 7.14  | 5.97  | lnc-RPS20-4 NONCODE c lnc-RPS20-4 NONHSAT1: chr8      | 55738758 | 55746047 -  |
| TC0800001810.oe.1 | 2.23  | 1.16  | 2.23 | up   | 8.95  | 7.80  | lnc-RPS20-3 LNCipedia lc lnc-RPS20-3 NONHSAT1: chr8   | 55750887 | 55756402 -  |
| TC0800001857.oe.1 | 2.19  | 1.13  | 2.19 | up   | 11.48 | 10.35 | lnc-GGH-4 NONCODE c lnc-GGH-4:1 NONHSAT1: chr8        | 61661814 | 61689715 -  |
| TC0800002000.oe.1 | 2.24  | 1.16  | 2.24 | up   | 4.83  | 3.67  | lnc-MRPS28 LNCipedia lc lnc-MRPS28 --- chr8           | 79931927 | 80034292 -  |
| TC0800002013.oe.1 | -2.25 | -1.17 | 2.25 | down | 4.10  | 5.26  | lnc-PAG1-1: LNCipedia lc lnc-PAG1-1: NONHSAT1: chr8   | 80628457 | 80631612 -  |
| TC0800002015.oe.1 | 2.91  | 1.54  | 2.91 | up   | 11.65 | 10.11 | lnc-PAG1-9 NONCODE c lnc-PAG1-9: NONHSAT1: chr8       | 80644939 | 80645173 -  |
| TC0800002132.oe.1 | 2.06  | 1.05  | 2.06 | up   | 9.56  | 8.52  | lnc-KIAA142 NONCODE c lnc-KIAA142 NONHSAT1: chr8      | 94393423 | 94399583 -  |
| TC0800002229.oe.1 | -2.28 | -1.19 | 2.28 | down | 3.15  | 4.34  | lnc-RRM2B- NONCODE c lnc-RRM2B- NONHSAT1: chr8        | 1.02E+08 | 102242619 - |
| TC0800002454.oe.1 | 2.02  | 1.02  | 2.02 | up   | 10.17 | 9.16  | lnc-FAM49B NONCODE c lnc-FAM49B NONHSAT1: chr8        | 1.3E+08  | 130401915 - |
| TC0800002477.oe.1 | -2.97 | -1.57 | 2.97 | down | 5.41  | 6.97  | lnc-NDRG1- NONCODE c lnc-NDRG1- NONHSAT1: chr8        | 1.33E+08 | 133297304 - |
| TC08000033.hg.4   | 2.57  | 1.36  | 2.57 | up   | 3.81  | 2.45  | DEFB109P1E defensin, bei --- --- chr8                 | 7312844  | 7319951 +   |
| TC08000705.hg.4   | -4.13 | -2.05 | 4.13 | down | 3.38  | 5.42  | HAS2-AS1 HAS2 antisei --- --- chr8                    | 1.22E+08 | 121645324 + |



|                   |       |       |      |      |       |       |             |                |                  |                 |          |             |             |
|-------------------|-------|-------|------|------|-------|-------|-------------|----------------|------------------|-----------------|----------|-------------|-------------|
| TC08001136.hg.4   | 2.19  | 1.13  | 2.19 | up   | 6.29  | 5.15  | LOC728024   | chromosome --- | ---              | chr8            | 37746556 | 37748046 -  |             |
| TC0900000156.oe.1 | -2.36 | -1.24 | 2.36 | down | 4.53  | 5.77  | Inc-SH3GL2  | LNCipedia      | lc Inc-SH3GL2    | NONHSAT1: chr9  | 17415818 | 17462984 +  |             |
| TC0900000261.oe.1 | 3.05  | 1.61  | 3.05 | up   | 13.70 | 12.09 | Inc-SPINK4  | LNCipedia      | lc Inc-SPINK4    | NONHSAT1: chr9  | 33025286 | 33038726 +  |             |
| TC0900000325.oe.1 | -2.91 | -1.54 | 2.91 | down | 5.37  | 6.91  | Inc-CA9-1   | LNCipedia      | lc Inc-CA9-1:1   | NONHSAT1: chr9  | 35680701 | 35681159 +  |             |
| TC0900000365.oe.1 | -3.60 | -1.85 | 3.60 | down | 7.67  | 9.52  | Inc-RG9MTC  | LNCipedia      | lc Inc-RG9MTC    | NONHSAT1: chr9  | 37865026 | 37867296 +  |             |
| TC0900000462.oe.1 | 2.17  | 1.12  | 2.17 | up   | 5.66  | 4.54  | Inc-RP11-2f | LNCipedia      | lc Inc-RP11-2f   | NONHSAT1: chr9  | 62817551 | 62817849 +  |             |
| TC0900000506.oe.1 | -2.18 | -1.13 | 2.18 | down | 3.01  | 4.14  | Inc-FOXD4L  | LNCipedia      | lc Inc-FOXD4L    | NONHSAT1: chr9  | 68396524 | 68406344 +  |             |
| TC0900000552.oe.1 | 2.36  | 1.24  | 2.36 | up   | 3.76  | 2.52  | Inc-ANXA1   | NONCODE        | lc Inc-ANXA1     | NONHSAT1: chr9  | 73168098 | 73170393 +  |             |
| TC0900000749.oe.1 | 2.16  | 1.11  | 2.16 | up   | 4.67  | 3.55  | Inc-HIATL1  | NONCODE        | lc Inc-HIATL1    | NONHSAT1: chr9  | 94346664 | 94347323 +  |             |
| TC0900000910.oe.1 | -2.10 | -1.07 | 2.10 | down | 6.28  | 7.35  | Inc-FAM206  | LNCipedia      | lc Inc-FAM206    | NONHSAT1: chr9  | 1.09E+08 | 109019566 + |             |
| TC0900001061.oe.1 | -2.44 | -1.29 | 2.44 | down | 6.80  | 8.08  | Inc-NEK6-2  | NONCODE        | lc Inc-NEK6-2    | NONHSAT1: chr9  | 1.24E+08 | 124359186 + |             |
| TC0900001111.oe.1 | 2.41  | 1.27  | 2.41 | up   | 5.63  | 4.36  | Inc-ZNF79-1 | LNCipedia      | lc Inc-ZNF79-1   | NONHSAT1: chr9  | 1.27E+08 | 127457413 + |             |
| TC0900001171.oe.1 | 2.22  | 1.15  | 2.22 | up   | 8.80  | 7.65  | Inc-RP11-1C | LNCipedia      | lc Inc-RP11-1C   | NONHSAT1: chr9  | 1.29E+08 | 128985262 + |             |
| TC0900001221.oe.1 | 2.20  | 1.14  | 2.20 | up   | 9.04  | 7.91  | Inc-AIF1L-5 | LNCipedia      | lc Inc-AIF1L-5   | NONHSAT1: chr9  | 1.31E+08 | 131198332 + |             |
| TC0900001350.oe.1 | 2.19  | 1.13  | 2.19 | up   | 12.04 | 10.91 | Inc-SLC34A3 | NONCODE        | lc Inc-SLC34A3   | NONHSAT1: chr9  | 1.37E+08 | 137243706 + |             |
| TC0900001579.oe.1 | 2.73  | 1.45  | 2.73 | up   | 8.19  | 6.74  | Inc-APTX-3  | LNCipedia      | lc Inc-APTX-3    | NONHSAT1: chr9  | 33025350 | 33039907 -  |             |
| TC0900001628.oe.1 | 2.59  | 1.37  | 2.59 | up   | 7.15  | 5.78  | Inc-SIT1-1  | LNCipedia      | lc Inc-SIT1-1:1  | NONHSAT1: chr9  | 35661838 | 35662644 -  |             |
| TC09001199.hg.4   | 2.00  | 1.00  | 2.00 | up   | 5.03  | 4.03  | SMC5-AS1    | SMC5 antise    | ---              | chr9            | 70193998 | 70258874 -  |             |
| TC09001698.hg.4   | 2.08  | 1.06  | 2.08 | up   | 6.65  | 5.59  | RNU6ATAC    | RNA, U6atac    | ---              | chr9            | 1.34E+08 | 134164564 - |             |
| TC0X00000041.oe.1 | 2.10  | 1.07  | 2.10 | up   | 6.44  | 5.37  | Inc-STS-5   | NONCODE        | lc Inc-STS-5:1   | NONHSAT1: chrX  | 6275635  | 6276642 +   |             |
| TC0X00000148.oe.1 | -2.63 | -1.39 | 2.63 | down | 6.43  | 7.82  | GS1-358P8.4 | LNCipedia      | lc Inc-PDK3-1    | NONHSAT1: chrX  | 24545516 | 24550466 +  |             |
| TC0X00000183.oe.1 | 2.53  | 1.34  | 2.53 | up   | 10.49 | 9.15  | Inc-GK-6    | LNCipedia      | lc Inc-GK-6:1    | NONHSAT1: chrX  | 30617454 | 30617693 +  |             |
| TC0X00000244.oe.1 | -2.58 | -1.37 | 2.58 | down | 4.47  | 5.84  | NONHSAGO    | LNCipedia      | lc Inc-USP9X-2   | NONHSAT1: chrX  | 41233633 | 41234283 +  |             |
| TC0X00000245.oe.1 | -2.53 | -1.34 | 2.53 | down | 5.15  | 6.49  | Inc-USP9X-3 | LNCipedia      | lc Inc-USP9X-3   | NONHSAT1: chrX  | 41235856 | 41236579 +  |             |
| TC0X00000468.oe.1 | -2.36 | -1.24 | 2.36 | down | 10.28 | 11.52 | Inc-STARD8  | NONCODE        | lc Inc-STARD8    | NONHSAT1: chrX  | 68533180 | 68537282 +  |             |
| TC0X00001172.oe.1 | 2.00  | 1.00  | 2.00 | up   | 10.09 | 9.09  | Inc-RPS6KA3 | LNCipedia      | lc Inc-RPS6KA3   | NONHSAT1: chrX  | 20136066 | 20136413 -  |             |
| TC0X00001260.oe.1 | -2.15 | -1.10 | 2.15 | down | 3.30  | 4.41  | Inc-MED14   | NONCODE        | lc Inc-MED14     | NONHSAT1: chrX  | 41660101 | 41665832 -  |             |
| TC0X00001660.oe.1 | 2.40  | 1.26  | 2.40 | up   | 7.64  | 6.37  | Inc-KCNE1L  | LNCipedia      | lc Inc-KCNE1L    | NONHSAT1: chrX  | 1.1E+08  | 109733275 - |             |
| TC0X00001676.oe.1 | 2.53  | 1.34  | 2.53 | up   | 4.40  | 3.07  | Inc-IL13RA2 | LNCipedia      | lc Inc-IL13RA2   | ---             | chrX     | 1.14E+08    | 114369434 - |
| TC0X00001858.oe.1 | -2.95 | -1.56 | 2.95 | down | 7.80  | 9.37  | Inc-MAGEA9  | LNCipedia      | lc Inc-MAGEA9    | NONHSAT1: chrX  | 1.49E+08 | 149478981 - |             |
| TC0X00001918.oe.1 | 2.25  | 1.17  | 2.25 | up   | 8.75  | 7.58  | Inc-DNASE1  | NONCODE        | lc Inc-DNASE1    | NONHSAT1: chrX  | 1.54E+08 | 154365207 - |             |
| TC0X00001930.oe.1 | 2.64  | 1.40  | 2.64 | up   | 9.65  | 8.25  | Inc-GAB3-1  | LNCipedia      | lc Inc-GAB3-1    | NONHSAT1: chrX  | 1.55E+08 | 154781596 - |             |
| TC0X00001931.oe.1 | 2.43  | 1.28  | 2.43 | up   | 9.68  | 8.40  | Inc-GAB3-2  | NONCODE        | lc Inc-GAB3-2    | NONHSAT1: chrX  | 1.55E+08 | 154786283 - |             |
| TC0X000910.hg.4   | 3.30  | 1.72  | 3.30 | up   | 9.73  | 8.01  | SCARNA9L    | small Cajal b  | ---              | chrX            | 20136066 | 20136413 -  |             |
| TC0X001084.hg.4   | 2.06  | 1.04  | 2.06 | up   | 3.89  | 2.85  | UQCRBP1     | ubiquinol-cy   | ---              | chrX            | 56736788 | 56737584 -  |             |
| TC0Y0000030.hg.4  | 3.21  | 1.68  | 3.21 | up   | 5.23  | 3.55  | RNU6-941P   | RNA, U6 sma    | ---              | chrY            | 7273972  | 7381548 +   |             |
| TC1000000014.oe.1 | 2.02  | 1.01  | 2.02 | up   | 4.39  | 3.38  | Inc-GTPBP4  | LNCipedia      | lc Inc-GTPBP4    | ---             | chr10    | 1080155     | 1082179 +   |
| TC1000000331.oe.1 | 2.19  | 1.13  | 2.19 | up   | 7.86  | 6.74  | Inc-LYZL1-1 | NONCODE        | lc Inc-LYZL1-1   | NONHSAT1: chr10 | 29697903 | 29698228 +  |             |
| TC1000000413.oe.1 | -2.20 | -1.14 | 2.20 | down | 3.22  | 4.36  | Inc-ZNF33A  | LNCipedia      | lc Inc-ZNF33A    | ---             | chr10    | 37661694    | 37672912 +  |
| TC1000000430.oe.1 | 2.78  | 1.48  | 2.78 | up   | 5.88  | 4.41  | Inc-ZNF37A  | NONCODE        | lc Inc-ZNF37A    | NONHSAT0: chr10 | 38501594 | 38504708 +  |             |
| TC1000000563.oe.1 | 2.65  | 1.41  | 2.65 | up   | 13.15 | 11.75 | Inc-DKK1-1  | LNCipedia      | lc Inc-DKK1-1    | NONHSAT0: chr10 | 52315057 | 52318042 +  |             |
| TC1000000607.oe.1 | -2.27 | -1.18 | 2.27 | down | 4.42  | 5.60  | Inc-ARID5B  | NONCODE        | lc Inc-ARID5B    | NONHSAT0: chr10 | 62374353 | 62402458 +  |             |
| TC1000000615.oe.1 | 2.22  | 1.15  | 2.22 | up   | 14.36 | 13.22 | Inc-NRBF2-3 | LNCipedia      | lc Inc-NRBF2-3   | NONHSAT0: chr10 | 63521409 | 63610312 +  |             |
| TC1000000624.oe.1 | -2.03 | -1.02 | 2.03 | down | 3.62  | 4.64  | NONHSAGO    | gene_id XLC    | Inc-LRRTM3       | NONHSAT0: chr10 | 65313785 | 65314970 +  |             |
| TC1000000915.oe.1 | 2.67  | 1.42  | 2.67 | up   | 10.53 | 9.12  | Inc-IFIT5-2 | LNCipedia      | lc Inc-IFIT5-2:1 | NONHSAT0: chr10 | 89705290 | 89729207 +  |             |
| TC1000000937.oe.1 | -3.27 | -1.71 | 3.27 | down | 6.54  | 8.25  | Inc-HECTD2  | LNCipedia      | lc Inc-HECTD2    | NONHSAT0: chr10 | 91282008 | 91284258 +  |             |
| TC1000000952.oe.1 | 2.49  | 1.32  | 2.49 | up   | 5.74  | 4.42  | Inc-O3FAR1  | LNCipedia      | lc Inc-O3FAR1    | NONHSAT0: chr10 | 93517207 | 93520277 +  |             |
| TC1000000970.oe.1 | -2.40 | -1.26 | 2.40 | down | 6.29  | 7.55  | Inc-CYP2C11 | LNCipedia      | lc Inc-CYP2C11   | NONHSAT0: chr10 | 94612287 | 94613904 +  |             |
| TC1000001176.oe.1 | -4.35 | -2.12 | 4.35 | down | 10.85 | 12.97 | Inc-SHOC2   | LNCipedia      | lc Inc-SHOC2     | NONHSAT0: chr10 | 1.11E+08 | 110898718 + |             |

|                   |       |       |      |      |       |       |                                                      |          |             |
|-------------------|-------|-------|------|------|-------|-------|------------------------------------------------------|----------|-------------|
| TC1000001208.oe.1 | -2.27 | -1.18 | 2.27 | down | 8.38  | 9.57  | Inc-CASP7-1 NONCODE (Inc-CASP7-1 NONHSAT0: chr10     | 1.14E+08 | 113570158 + |
| TC1000001210.oe.1 | -4.81 | -2.26 | 4.81 | down | 7.72  | 9.99  | Inc-AL1624C LNCipedia (Inc-AL1624C NONHSAT0: chr10   | 1.14E+08 | 113917190 + |
| TC1000001297.oe.1 | 2.24  | 1.17  | 2.24 | up   | 4.34  | 3.17  | Inc-TACC2-1 NONCODE (Inc-TACC2-1 NONHSAT0: chr10     | 1.22E+08 | 121934456 + |
| TC1000001618.oe.1 | -2.25 | -1.17 | 2.25 | down | 4.39  | 5.56  | Inc-C1QL3-1 NONCODE (Inc-C1QL3-1 NONHSAT0: chr10     | 16512080 | 16514516 -  |
| TC1000001834.oe.1 | -2.54 | -1.35 | 2.54 | down | 7.78  | 9.13  | Inc-C10orf11 LNCipedia (Inc-C10orf11 NONHSAT0: chr10 | 44376885 | 44377100 -  |
| TC1000001926.oe.1 | -2.27 | -1.18 | 2.27 | down | 10.74 | 11.92 | Inc-A1CF-4 LNCipedia (Inc-A1CF-4: NONHSAT0: chr10    | 50800033 | 50805968 -  |
| TC1000001933.oe.1 | -2.24 | -1.16 | 2.24 | down | 2.85  | 4.02  | Inc-CSTF2T- LNCipedia (Inc-CSTF2T- --- chr10         | 52120883 | 52140539 -  |
| TC1000002024.oe.1 | 3.29  | 1.72  | 3.29 | up   | 6.69  | 4.97  | Inc-RUFY2-1 LNCipedia (Inc-RUFY2-1 NONHSAT0: chr10   | 68416686 | 68419423 -  |
| TC1000002028.oe.1 | -2.41 | -1.27 | 2.41 | down | 4.47  | 5.74  | Inc-SLC25A1 NONCODE (Inc-SLC25A1 NONHSAT0: chr10     | 68691664 | 68692941 -  |
| TC1000002083.oe.1 | -2.20 | -1.14 | 2.20 | down | 11.91 | 13.05 | Inc-PLA2G12 NONCODE (Inc-PLA2G12 NONHSAT0: chr10     | 73009640 | 73016861 -  |
| TC1000002084.oe.1 | 3.04  | 1.61  | 3.04 | up   | 4.66  | 3.06  | Inc-ECD-3 LNCipedia (Inc-ECD-3:1 NONHSAT0: chr10     | 73069312 | 73069787 -  |
| TC1000002101.oe.1 | 2.00  | 1.00  | 2.00 | up   | 5.12  | 4.12  | RP11-574K1 LNCipedia (Inc-AGAP5- NONHSAT0: chr10     | 73740871 | 73744372 -  |
| TC1000002225.oe.1 | 2.05  | 1.04  | 2.05 | up   | 5.40  | 4.36  | Inc-GLUD1- LNCipedia (Inc-GLUD1- --- chr10           | 87278422 | 87332633 -  |
| TC1000002413.oe.1 | -2.01 | -1.01 | 2.01 | down | 6.34  | 7.34  | Inc-ARL3-2 NONCODE (Inc-ARL3-2: NONHSAT0: chr10      | 1.03E+08 | 102831703 - |
| TC1000002475.oe.1 | 2.25  | 1.17  | 2.25 | up   | 7.90  | 6.73  | Inc-AFAP1L2 NONCODE (Inc-AFAP1L2 NONHSAT0: chr10     | 1.14E+08 | 114132094 - |
| TC1000002645.oe.1 | 2.00  | 1.00  | 2.00 | up   | 3.72  | 2.72  | Inc-EBF3-13 LNCipedia (Inc-EBF3-13 --- chr10         | 1.3E+08  | 129538281 - |
| TC10000306.hg.4   | 3.64  | 1.86  | 3.64 | up   | 7.28  | 5.42  | FAM35DP family with s --- --- chr10                  | 47689700 | 47731218 +  |
| TC10001298.hg.4   | 2.43  | 1.28  | 2.43 | up   | 5.14  | 3.86  | PRKG1-AS1 PRKG1 antisense --- --- chr10              | 52230759 | 52314128 -  |
| TC10001553.hg.4   | 2.52  | 1.33  | 2.52 | up   | 4.12  | 2.78  | LOC1019271ENTPD1 anti --- --- chr10                  | 95753206 | 96090238 -  |
| TC1100000131.oe.1 | 2.47  | 1.31  | 2.47 | up   | 5.40  | 4.09  | Inc-TRIM6-1 NONCODE (Inc-TRIM6-1 NONHSAT0: chr11     | 5634838  | 5666380 +   |
| TC1100000157.oe.1 | 2.24  | 1.17  | 2.24 | up   | 6.96  | 5.80  | Inc-OR2D3- LNCipedia (Inc-OR2D3- NONHSAT0: chr11     | 6943190  | 6956533 +   |
| TC1100000194.oe.1 | 2.82  | 1.50  | 2.82 | up   | 11.86 | 10.37 | Inc-ZNF143- LNCipedia (Inc-ZNF143- NONHSAT0: chr11   | 9585183  | 9588456 +   |
| TC1100000217.oe.1 | 2.04  | 1.03  | 2.04 | up   | 5.05  | 4.03  | Inc-MICAL2- LNCipedia (Inc-MICAL2- --- chr11         | 11862185 | 11862412 +  |
| TC1100000247.oe.1 | 2.09  | 1.07  | 2.09 | up   | 5.16  | 4.10  | Inc-ARNTL-1 LNCipedia (Inc-ARNTL-1 --- chr11         | 13675686 | 13675918 +  |
| TC1100000248.oe.1 | 2.70  | 1.43  | 2.70 | up   | 11.71 | 10.27 | Inc-ARNTL-1 LNCipedia (Inc-ARNTL-1 NONHSAT0: chr11   | 13710724 | 13715843 +  |
| TC1100000568.oe.1 | -3.59 | -1.84 | 3.59 | down | 6.84  | 8.68  | Inc-ZNF408- NONCODE (Inc-ZNF408- NONHSAT0: chr11     | 46723180 | 46726064 +  |
| TC1100000643.oe.1 | -2.05 | -1.04 | 2.05 | down | 11.11 | 12.15 | Inc-CLP1-2 LNCipedia (Inc-CLP1-2: NONHSAT0: chr11    | 57602045 | 57614453 +  |
| TC1100000817.oe.1 | 2.66  | 1.41  | 2.66 | up   | 8.27  | 6.86  | CMB9-22P1: N/A --- --- chr11                         | 65455258 | 65466720 +  |
| TC1100000920.oe.1 | 2.20  | 1.13  | 2.20 | up   | 8.66  | 7.52  | Inc-NDUFV1 NONCODE (Inc-NDUFV1 NONHSAT0: chr11       | 67620004 | 67627393 +  |
| TC1100001171.oe.1 | 2.34  | 1.23  | 2.34 | up   | 10.00 | 8.78  | Inc-PCF11-2 LNCipedia (Inc-PCF11-2 NONHSAT0: chr11   | 83209399 | 83209634 +  |
| TC1100001262.oe.1 | 2.96  | 1.56  | 2.96 | up   | 11.07 | 9.51  | Inc-C11orf5- LNCipedia (Inc-C11orf5- NONHSAT0: chr11 | 93691681 | 93695620 +  |
| TC1100001388.oe.1 | 2.07  | 1.05  | 2.07 | up   | 5.06  | 4.01  | Inc-PTS-5 LNCipedia (Inc-PTS-5:1 NONHSAT0: chr11     | 1.12E+08 | 112218157 + |
| TC1100001414.oe.1 | 3.14  | 1.65  | 3.14 | up   | 8.18  | 6.53  | Inc-ZBTB16- LNCipedia (Inc-ZBTB16- NONHSAT0: chr11   | 1.14E+08 | 114309729 + |
| TC1100001438.oe.1 | -2.09 | -1.06 | 2.09 | down | 11.26 | 12.32 | Inc-PAFAH1 LNCipedia (Inc-PAFAH1 NONHSAT0: chr11     | 1.17E+08 | 116833067 + |
| TC1100001446.oe.1 | -2.15 | -1.10 | 2.15 | down | 8.27  | 9.37  | Inc-PAFAH1 LNCipedia (Inc-PAFAH1 NONHSAT0: chr11     | 1.17E+08 | 117182540 + |
| TC1100001513.oe.1 | 3.04  | 1.60  | 3.04 | up   | 8.14  | 6.54  | Inc-POU2F3 LNCipedia (Inc-POU2F3 NONHSAT0: chr11     | 1.2E+08  | 120327641 + |
| TC1100001524.oe.1 | -3.26 | -1.71 | 3.26 | down | 10.21 | 11.92 | Inc-SC5DL-2 LNCipedia (Inc-SC5DL-2 NONHSAT0: chr11   | 1.22E+08 | 121558773 + |
| TC1100001525.oe.1 | -4.74 | -2.24 | 4.74 | down | 6.30  | 8.55  | Inc-SC5DL-3 NONCODE (Inc-SC5DL-3 NONHSAT0: chr11     | 1.22E+08 | 121632240 + |
| TC1100001538.oe.1 | -2.48 | -1.31 | 2.48 | down | 4.29  | 5.60  | Inc-CRTAM- NONCODE (Inc-CRTAM- NONHSAT0: chr11       | 1.23E+08 | 122947524 + |
| TC1100001561.oe.1 | 2.27  | 1.18  | 2.27 | up   | 5.53  | 4.35  | Inc-OR10D3 LNCipedia (Inc-OR10D3 --- chr11           | 1.24E+08 | 124271078 + |
| TC1100001786.oe.1 | 2.05  | 1.04  | 2.05 | up   | 11.63 | 10.59 | Inc-RHOG-3 LNCipedia (Inc-RHOG-3 NONHSAT0: chr11     | 3760141  | 3762960 -   |
| TC1100001975.oe.1 | 2.21  | 1.15  | 2.21 | up   | 5.97  | 4.83  | Inc-SAA2-1 SAA2-SAA4 Inc-SAA2-1: --- chr11           | 18231423 | 18248635 -  |
| TC1100002033.oe.1 | 2.05  | 1.03  | 2.05 | up   | 9.95  | 8.92  | Inc-BDNF-6 LNCipedia (Inc-BDNF-6 NONHSAT0: chr11     | 28084274 | 28088580 -  |
| TC1100002034.oe.1 | 2.20  | 1.14  | 2.20 | up   | 7.57  | 6.43  | Inc-BDNF-7 NONCODE (Inc-BDNF-7 NONHSAT0: chr11       | 28097332 | 28108145 -  |
| TC1100002103.oe.1 | -2.07 | -1.05 | 2.07 | down | 3.52  | 4.57  | Inc-ELF5-1 LNCipedia (Inc-ELF5-1:1 --- chr11         | 34462056 | 34468510 -  |
| TC1100002184.oe.1 | -2.11 | -1.08 | 2.11 | down | 10.86 | 11.94 | Inc-PEX16-2 LNCipedia (Inc-PEX16-2 NONHSAT0: chr11   | 45938219 | 45953615 -  |
| TC1100002333.oe.1 | -2.23 | -1.16 | 2.23 | down | 3.13  | 4.28  | Inc-CPSF7-5 LNCipedia (Inc-CPSF7-5 NONHSAT0: chr11   | 61547167 | 61556137 -  |
| TC1100002449.oe.1 | -2.04 | -1.03 | 2.04 | down | 4.08  | 5.11  | Inc-LTBP3-8 NONCODE (Inc-LTBP3-8 NONHSAT0: chr11     | 65379458 | 65380989 -  |
| TC1100002591.oe.1 | 2.13  | 1.09  | 2.13 | up   | 5.35  | 4.26  | Inc-NUMA1 LNCipedia (Inc-NUMA1 --- chr11             | 71916326 | 71916808 -  |

|                   |       |       |      |      |       |       |                                                     |          |             |
|-------------------|-------|-------|------|------|-------|-------|-----------------------------------------------------|----------|-------------|
| TC1100002673.oe.1 | 2.07  | 1.05  | 2.07 | up   | 4.48  | 3.44  | lnc-WNT11- LNCipedia lnc-WNT11- NONHSAT0: chr11     | 75942129 | 75942435 -  |
| TC1100002764.oe.1 | 2.13  | 1.09  | 2.13 | up   | 4.67  | 3.58  | lnc-AP00097 NONCODE c lnc-AP00097 NONHSAT0: chr11   | 85757760 | 85811140 -  |
| TC1100002796.oe.1 | -2.14 | -1.10 | 2.14 | down | 6.61  | 7.71  | lnc-GRM5-1 LNCipedia lnc-GRM5-1 NONHSAT0: chr11     | 89326361 | 89336083 -  |
| TC1100002797.oe.1 | -3.01 | -1.59 | 3.01 | down | 8.57  | 10.17 | lnc-TRIM49- NONCODE c lnc-TRIM49- NONHSAT0: chr11   | 89443421 | 89491394 -  |
| TC1100002827.oe.1 | -2.89 | -1.53 | 2.89 | down | 6.86  | 8.39  | lnc-SLC36A4 LNCipedia lnc-SLC36A4 NONHSAT0: chr11   | 93144175 | 93146492 -  |
| TC1100002844.oe.1 | 2.01  | 1.01  | 2.01 | up   | 7.65  | 6.64  | lnc-GPR83-4 LNCipedia lnc-GPR83-4 NONHSAT0: chr11   | 94478761 | 94493849 -  |
| TC1100002931.oe.1 | 2.02  | 1.02  | 2.02 | up   | 7.22  | 6.20  | lnc-ALKBH8 NONCODE c lnc-ALKBH8 NONHSAT0: chr11     | 1.07E+08 | 107353730 - |
| TC1100003064.oe.1 | 2.15  | 1.11  | 2.15 | up   | 9.57  | 8.46  | lnc-MPZL3-1 NONCODE c lnc-MPZL3-1 NONHSAT0: chr11   | 1.18E+08 | 118257660 - |
| TC1100003065.oe.1 | 2.27  | 1.18  | 2.27 | up   | 7.98  | 6.80  | lnc-MPZL3-1 LNCipedia lnc-MPZL3-1 NONHSAT0: chr11   | 1.18E+08 | 118264386 - |
| TC1100003141.oe.1 | 3.39  | 1.76  | 3.39 | up   | 17.67 | 15.91 | lnc-CLMP-3 LNCipedia lnc-CLMP-3 NONHSAT0: chr11     | 1.23E+08 | 123062136 - |
| TC1100003216.oe.1 | 2.75  | 1.46  | 2.75 | up   | 8.33  | 6.88  | lnc-RP11-89 LNCipedia lnc-RP11-89 NONHSAT0: chr11   | 1.31E+08 | 130758600 - |
| TC1200000113.oe.1 | 2.17  | 1.12  | 2.17 | up   | 11.18 | 10.07 | lnc-GAPDH- LNCipedia lnc-GAPDH- NONHSAT0: chr12     | 6529260  | 6530730 +   |
| TC1200000289.oe.1 | -2.03 | -1.02 | 2.03 | down | 3.04  | 4.06  | lnc-MGST1- LNCipedia lnc-MGST1- --- chr12           | 16311894 | 16338471 +  |
| TC1200000323.oe.1 | 2.04  | 1.03  | 2.04 | up   | 4.57  | 3.54  | lnc-PLEKHA1 gene_id XLC lnc-PLEKHA1 NONHSAT0: chr12 | 19671159 | 19673258 +  |
| TC1200000327.oe.1 | -3.97 | -1.99 | 3.97 | down | 6.16  | 8.15  | lnc-SLCO1C LNCipedia lnc-SLCO1C NONHSAT0: chr12     | 20682297 | 20684072 +  |
| TC1200000331.oe.1 | -2.26 | -1.18 | 2.26 | down | 4.61  | 5.79  | lnc-RP11-12 LNCipedia lnc-RP11-12 NONHSAT0: chr12   | 21131207 | 21197096 +  |
| TC1200000342.oe.1 | -2.23 | -1.15 | 2.23 | down | 2.91  | 4.07  | lnc-ETNK1-1 LNCipedia lnc-ETNK1-1 --- chr12         | 22557239 | 22557503 +  |
| TC1200000370.oe.1 | 2.14  | 1.10  | 2.14 | up   | 4.01  | 2.91  | RP11-29515: N/A --- chr12                           | 25225103 | 25225665 +  |
| TC1200000536.oe.1 | -2.09 | -1.06 | 2.09 | down | 10.09 | 11.16 | lnc-ARID2-1 LNCipedia lnc-ARID2-1 NONHSAT0: chr12   | 46358351 | 46360617 +  |
| TC1200000641.oe.1 | 2.04  | 1.03  | 2.04 | up   | 4.41  | 3.39  | lnc-ANKRD3 LNCipedia lnc-ANKRD3 --- chr12           | 51751554 | 51751904 +  |
| TC1200000672.oe.1 | 2.43  | 1.28  | 2.43 | up   | 14.83 | 13.55 | lnc-EIF4B-5 LNCipedia lnc-EIF4B-5: NONHSAT0: chr12  | 52951496 | 52952278 +  |
| TC1200000707.oe.1 | 2.04  | 1.03  | 2.04 | up   | 5.54  | 4.51  | RP11-834C1 uncharacteri lnc-HOXC4- NONHSAT0: chr12  | 54126071 | 54132909 +  |
| TC1200000712.oe.1 | -2.32 | -1.22 | 2.32 | down | 2.50  | 3.71  | NONHSAGO NONCODE c lnc-HNRNP1 NONHSAT0: chr12       | 54262615 | 54279063 +  |
| TC1200000755.oe.1 | -2.03 | -1.02 | 2.03 | down | 6.89  | 7.91  | lnc-RP11-6C NONCODE c lnc-RP11-6C NONHSAT0: chr12   | 56094522 | 56095527 +  |
| TC1200000783.oe.1 | -2.26 | -1.17 | 2.26 | down | 8.22  | 9.39  | lnc-NXPH4- LNCipedia lnc-NXPH4- NONHSAT0: chr12     | 57200274 | 57201153 +  |
| TC1200000920.oe.1 | 2.07  | 1.05  | 2.07 | up   | 12.49 | 11.44 | lnc-SLC35E3 NONCODE c lnc-SLC35E3 NONHSAT0: chr12   | 68709223 | 68714378 +  |
| TC1200000954.oe.1 | 5.03  | 2.33  | 5.03 | up   | 6.80  | 4.47  | lnc-THAP2-1 NONCODE c lnc-THAP2-1 NONHSAT0: chr12   | 71567262 | 71573027 +  |
| TC1200001127.oe.1 | 2.77  | 1.47  | 2.77 | up   | 7.92  | 6.45  | lnc-VEZT-2 NONCODE c lnc-VEZT-2: NONHSAT0: chr12    | 95308515 | 95310637 +  |
| TC1200001134.oe.1 | 2.02  | 1.02  | 2.02 | up   | 4.41  | 3.39  | lnc-RP11-53 LNCipedia lnc-RP11-53 NONHSAT0: chr12   | 95865079 | 95866451 +  |
| TC1200001178.oe.1 | -2.08 | -1.06 | 2.08 | down | 5.83  | 6.89  | lnc-UTP20-3 LNCipedia lnc-UTP20-3 NONHSAT0: chr12   | 1.01E+08 | 101086813 + |
| TC1200001194.oe.1 | 2.05  | 1.04  | 2.05 | up   | 9.60  | 8.56  | lnc-DRAM1- NONCODE c lnc-DRAM1- NONHSAT0: chr12     | 1.02E+08 | 102197361 + |
| TC1200001272.oe.1 | -2.15 | -1.11 | 2.15 | down | 6.48  | 7.58  | lnc-UBE3B-1 NONCODE c lnc-UBE3B-1 NONHSAT0: chr12   | 1.1E+08  | 109587099 + |
| TC1200001330.oe.1 | -2.06 | -1.05 | 2.06 | down | 3.34  | 4.39  | lnc-RPH3A-1 LNCipedia lnc-RPH3A- --- chr12          | 1.13E+08 | 112580012 + |
| TC1200001653.oe.1 | 2.14  | 1.09  | 2.14 | up   | 7.66  | 6.56  | lnc-PXMP2- LNCipedia lnc-PXMP2- NONHSAT0: chr12     | 1.33E+08 | 132721084 + |
| TC1200001825.oe.1 | -3.65 | -1.87 | 3.65 | down | 14.92 | 16.79 | lnc-SLC2A14 LNCipedia lnc-SLC2A14 NONHSAT0: chr12   | 7919231  | 7919750 -   |
| TC1200001827.oe.1 | -2.82 | -1.49 | 2.82 | down | 10.68 | 12.18 | lnc-SLC2A14 NONCODE c lnc-SLC2A14 NONHSAT0: chr12   | 7932646  | 7936187 -   |
| TC1200001843.oe.1 | 2.32  | 1.21  | 2.32 | up   | 4.86  | 3.65  | NONHSAGO A2ML1 antis lnc-M6PR-3 NONHSAT0: chr12     | 8776219  | 8830947 -   |
| TC1200001870.oe.1 | 3.27  | 1.71  | 3.27 | up   | 4.61  | 2.90  | lnc-CLEC2A NONCODE c lnc-CLEC2A NONHSAT0: chr12     | 9856901  | 9869386 -   |
| TC1200001887.oe.1 | 2.93  | 1.55  | 2.93 | up   | 9.40  | 7.85  | lnc-STYK1-1 LNCipedia lnc-STYK1-1 NONHSAT0: chr12   | 10699317 | 10704438 -  |
| TC1200001892.oe.1 | 2.21  | 1.15  | 2.21 | up   | 5.08  | 3.93  | lnc-TAS2R4f LNCipedia lnc-TAS2R4f NONHSAT0: chr12   | 11048332 | 11049256 -  |
| TC1200001905.oe.1 | 2.02  | 1.02  | 2.02 | up   | 9.48  | 8.47  | lnc-AC00762 NONCODE c lnc-AC00762 NONHSAT0: chr12   | 12477886 | 12506187 -  |
| TC1200002098.oe.1 | 2.01  | 1.01  | 2.01 | up   | 9.88  | 8.87  | lnc-ABCD2- NONCODE c lnc-ABCD2- NONHSAT0: chr12     | 39333037 | 39337541 -  |
| TC1200002130.oe.1 | -2.25 | -1.17 | 2.25 | down | 2.97  | 4.14  | NONHSAGO NONCODE c lnc-NELL2-1 NONHSAT0: chr12      | 44244394 | 44263982 -  |
| TC1200002149.oe.1 | -2.08 | -1.06 | 2.08 | down | 13.57 | 14.63 | lnc-SLC38A1 LNCipedia lnc-SLC38A1 NONHSAT0: chr12   | 46187791 | 46188040 -  |
| TC1200002220.oe.1 | 2.31  | 1.21  | 2.31 | up   | 8.11  | 6.91  | lnc-LMBR1L LNCipedia lnc-LMBR1L NONHSAT0: chr12     | 49128981 | 49131395 -  |
| TC1200002263.oe.1 | -2.09 | -1.06 | 2.09 | down | 3.29  | 4.36  | NONHSAGO NONCODE c lnc-KRT80-6 NONHSAT0: chr12      | 51809705 | 51810600 -  |
| TC1200002339.oe.1 | 2.11  | 1.07  | 2.11 | up   | 8.78  | 7.70  | lnc-GTSF1-2 LNCipedia lnc-GTSF1-2 NONHSAT0: chr12   | 54464697 | 54473602 -  |
| TC1200002394.oe.1 | 2.22  | 1.15  | 2.22 | up   | 7.03  | 5.88  | lnc-MIP-3 LNCipedia lnc-MIP-3:1 NONHSAT0: chr12     | 56418290 | 56421090 -  |
| TC1200002413.oe.1 | -2.67 | -1.42 | 2.67 | down | 3.13  | 4.54  | lnc-TMEM15 LNCipedia lnc-TMEM15 NONHSAT0: chr12     | 57096243 | 57097290 -  |

|                   |       |       |      |      |       |       |                                                       |          |             |
|-------------------|-------|-------|------|------|-------|-------|-------------------------------------------------------|----------|-------------|
| TC1200002490.oe.1 | -2.29 | -1.20 | 2.29 | down | 9.83  | 11.03 | Inc-LLPH-3 NONCODE c Inc-LLPH-3: NONHSAT0: chr12      | 66137829 | 66138937 -  |
| TC1200002547.oe.1 | 2.23  | 1.16  | 2.23 | up   | 7.13  | 5.97  | Inc-TSPAN8 LNCipedia lc Inc-TSPAN8 NONHSAT0: chr12    | 71610110 | 71611286 -  |
| TC1200002586.oe.1 | -2.29 | -1.20 | 2.29 | down | 2.79  | 3.99  | Inc-OSBPL8 LNCipedia lc Inc-OSBPL8 NONHSAT0: chr12    | 76581285 | 76581949 -  |
| TC1200002714.oe.1 | 2.51  | 1.33  | 2.51 | up   | 5.24  | 3.92  | Inc-NTN4-2 LNCipedia lc Inc-NTN4-2 NONHSAT0: chr12    | 95524520 | 95529000 -  |
| TC1200002767.oe.1 | -2.28 | -1.19 | 2.28 | down | 3.48  | 4.67  | Inc-ANKS1B LNCipedia lc Inc-ANKS1B NONHSAT0: chr12    | 1E+08    | 100054526 - |
| TC1200002960.oe.1 | -2.12 | -1.08 | 2.12 | down | 7.42  | 8.51  | Inc-C12orf4: NONCODE c Inc-C12orf4: NONHSAT0: chr12   | 1.16E+08 | 115972465 - |
| TC1200002963.oe.1 | 2.07  | 1.05  | 2.07 | up   | 4.42  | 3.37  | OTTHUMG0 LNCipedia lc Inc-C12orf4: NONHSAT0: chr12    | 1.16E+08 | 116181295 - |
| TC1200003017.oe.1 | 2.50  | 1.32  | 2.50 | up   | 7.59  | 6.27  | Inc-RAB35-: LNCipedia lc Inc-RAB35-: NONHSAT0: chr12  | 1.2E+08  | 119711011 - |
| TC1200003066.oe.1 | -2.19 | -1.13 | 2.19 | down | 8.75  | 9.88  | Inc-RSRC2-1 NONCODE c Inc-RSRC2-1 NONHSAT0: chr12     | 1.22E+08 | 122483690 - |
| TC12000540.hg.4   | 2.11  | 1.08  | 2.11 | up   | 5.07  | 3.99  | AGAP2-AS1 AGAP2 antis --- --- chr12                   | 57726240 | 57728356 +  |
| TC12001418.hg.4   | 2.41  | 1.27  | 2.41 | up   | 4.50  | 3.23  | RACGAP1P Rac GTPase --- --- chr12                     | 45062618 | 45065411 -  |
| TC1300000023.oe.1 | 2.65  | 1.41  | 2.65 | up   | 8.35  | 6.94  | Inc-MPHOS1 LNCipedia lc Inc-MPHOS1 NONHSAT0: chr13    | 19605592 | 19624904 +  |
| TC1300000168.oe.1 | -2.44 | -1.28 | 2.44 | down | 4.67  | 5.95  | Inc-MTUS2- LNCipedia lc Inc-MTUS2- --- chr13          | 29509415 | 29514078 +  |
| TC1300000198.oe.1 | 2.29  | 1.20  | 2.29 | up   | 8.10  | 6.90  | Inc-FRY-3 LNCipedia lc Inc-FRY-3:1 NONHSAT0: chr13    | 32396809 | 32398448 +  |
| TC1300000236.oe.1 | 2.07  | 1.05  | 2.07 | up   | 7.45  | 6.40  | Inc-EXOSC8 NONCODE c Inc-EXOSC8 NONHSAT0: chr13       | 37009511 | 37009732 +  |
| TC1300000266.oe.1 | -2.01 | -1.01 | 2.01 | down | 3.09  | 4.09  | Inc-SLC25A1 LNCipedia lc Inc-SLC25A1 NONHSAT0: chr13  | 40298223 | 40299505 +  |
| TC1300000501.oe.1 | -2.02 | -1.01 | 2.02 | down | 2.36  | 3.37  | LINC01052/ NONCODE c Inc-AL4459E NONHSAT0: chr13      | 65866063 | 65878219 +  |
| TC1300000672.oe.1 | 2.04  | 1.03  | 2.04 | up   | 3.91  | 2.88  | Inc-GPC6-3 LNCipedia lc Inc-GPC6-3: --- chr13         | 91854657 | 91855926 +  |
| TC1300000704.oe.1 | 2.02  | 1.01  | 2.02 | up   | 7.17  | 6.16  | RP11-128N1N/A --- --- chr13                           | 97435946 | 97436168 +  |
| TC1300000934.oe.1 | -2.25 | -1.17 | 2.25 | down | 3.28  | 4.45  | Inc-ZMYM5 LNCipedia lc Inc-ZMYM5 NONHSAT0: chr13      | 19899833 | 19919690 -  |
| TC1300000988.oe.1 | 2.26  | 1.18  | 2.26 | up   | 4.86  | 3.68  | Inc-FAM123 LNCipedia lc Inc-FAM123 NONHSAT0: chr13    | 24885290 | 24886079 -  |
| TC1300001028.oe.1 | -4.61 | -2.21 | 4.61 | down | 4.16  | 6.37  | Inc-SLC46A: LNCipedia lc Inc-SLC46A: NONHSAT0: chr13  | 28700064 | 28704557 -  |
| TC1300001125.oe.1 | 2.13  | 1.09  | 2.13 | up   | 14.08 | 12.99 | Inc-STOML3 NONCODE c Inc-STOML3 NONHSAT0: chr13       | 39029032 | 39037294 -  |
| TC1300001179.oe.1 | -2.03 | -1.02 | 2.03 | down | 14.27 | 15.30 | RP11-5G9.6 N/A --- --- chr13                          | 43894725 | 43895182 -  |
| TC1300001234.oe.1 | 2.85  | 1.51  | 2.85 | up   | 7.41  | 5.89  | Inc-RCBTB2 LNCipedia lc Inc-RCBTB2 NONHSAT0: chr13    | 48411741 | 48412489 -  |
| TC1300001249.oe.1 | 2.30  | 1.20  | 2.30 | up   | 5.37  | 4.17  | Inc-AL13621 LNCipedia lc Inc-AL13621 NONHSAT0: chr13  | 49418934 | 49425841 -  |
| TC1300001389.oe.1 | 2.10  | 1.07  | 2.10 | up   | 9.38  | 8.31  | Inc-DIS3-4 LNCipedia lc Inc-DIS3-4:1 NONHSAT0: chr13  | 73093626 | 73100948 -  |
| TC1300001580.oe.1 | -2.48 | -1.31 | 2.48 | down | 4.19  | 5.50  | Inc-C13orf2 LNCipedia lc Inc-C13orf2 NONHSAT0: chr13  | 1.03E+08 | 102793678 - |
| TC13000354.hg.4   | 2.39  | 1.26  | 2.39 | up   | 4.33  | 3.07  | FKSG29 FKSG29 --- --- chr13                           | 99351420 | 99352027 +  |
| TC13000675.hg.4   | 2.01  | 1.00  | 2.01 | up   | 4.51  | 3.51  | GUCY1B2 guanylate cy --- --- chr13                    | 50994511 | 51080862 -  |
| TC1400000032.oe.1 | 2.79  | 1.48  | 2.79 | up   | 8.61  | 7.13  | Inc-APEX1-: LNCipedia lc Inc-APEX1-: NONHSAT0: chr14  | 20476489 | 20477087 +  |
| TC1400000353.oe.1 | -3.12 | -1.64 | 3.12 | down | 8.01  | 9.65  | Inc-ARF6-3 LNCipedia lc Inc-ARF6-3: NONHSAT0: chr14   | 49894417 | 49897054 +  |
| TC1400000511.oe.1 | -2.36 | -1.24 | 2.36 | down | 7.10  | 8.34  | Inc-C14orf1 LNCipedia lc Inc-C14orf1: NONHSAT0: chr14 | 60296402 | 60299085 +  |
| TC1400000542.oe.1 | 2.03  | 1.02  | 2.03 | up   | 13.27 | 12.25 | Inc-SYNE2-: NONCODE c Inc-SYNE2-: NONHSAT0: chr14     | 63601509 | 63601814 +  |
| TC1400000600.oe.1 | -2.23 | -1.16 | 2.23 | down | 3.50  | 4.66  | RP11-817G1N/A --- --- chr14                           | 69154311 | 69154804 +  |
| TC1400000623.oe.1 | -2.19 | -1.13 | 2.19 | down | 4.51  | 5.64  | Inc-ADAM2 LNCipedia lc Inc-ADAM2: NONHSAT0: chr14     | 70366854 | 70373093 +  |
| TC1400000676.oe.1 | -2.03 | -1.02 | 2.03 | down | 3.57  | 4.59  | Inc-PTGR2-2 LNCipedia lc Inc-PTGR2-2: --- chr14       | 73904552 | 73904850 +  |
| TC1400000847.oe.1 | -2.14 | -1.10 | 2.14 | down | 2.81  | 3.91  | Inc-GOLGA5 LNCipedia lc Inc-GOLGA5 NONHSAT0: chr14    | 92926101 | 92927589 +  |
| TC1400000858.oe.1 | 2.44  | 1.29  | 2.44 | up   | 4.64  | 3.36  | Inc-IFI27-2 LNCipedia lc Inc-IFI27-2:1 --- chr14      | 94227390 | 94249686 +  |
| TC1400000888.oe.1 | 2.04  | 1.03  | 2.04 | up   | 9.10  | 8.07  | Inc-BDKRB1 NONCODE c Inc-BDKRB1 NONHSAT0: chr14       | 96223108 | 96223347 +  |
| TC1400001139.oe.1 | 2.16  | 1.11  | 2.16 | up   | 5.77  | 4.66  | NONHSAG0 LNCipedia lc Inc-SALL2-1 NONHSAT0: chr14     | 21507893 | 21511342 -  |
| TC1400001161.oe.1 | 2.02  | 1.01  | 2.02 | up   | 12.43 | 11.42 | Inc-RBM23 NONCODE c Inc-RBM23 NONHSAT0: chr14         | 22926481 | 22929394 -  |
| TC1400001337.oe.1 | 2.28  | 1.19  | 2.28 | up   | 4.03  | 2.84  | Inc-CLEC14 LNCipedia lc Inc-CLEC14: --- chr14         | 37907394 | 37960543 -  |
| TC1400001404.oe.1 | -2.15 | -1.10 | 2.15 | down | 4.06  | 5.17  | Inc-NEMF-1 gene_id XLC Inc-NEMF-1 NONHSAT0: chr14     | 49861876 | 49864465 -  |
| TC1400001716.oe.1 | -2.69 | -1.43 | 2.69 | down | 9.72  | 11.15 | Inc-FAM161 LNCipedia lc Inc-FAM161 NONHSAT0: chr14    | 73963230 | 73965055 -  |
| TC1400002034.oe.1 | 2.72  | 1.44  | 2.72 | up   | 15.85 | 14.41 | Inc-MOK-7 NONCODE c Inc-MOK-7: NONHSAT0: chr14        | 1.02E+08 | 102084798 - |
| TC1400002035.oe.1 | 2.28  | 1.19  | 2.28 | up   | 4.86  | 3.67  | Inc-MOK-6 LNCipedia lc Inc-MOK-6: NONHSAT0: chr14     | 1.02E+08 | 102085707 - |
| TC1500000004.oe.1 | 2.08  | 1.05  | 2.08 | up   | 6.36  | 5.30  | Inc-OR4M2 NONCODE c Inc-OR4M2 NONHSAT0: chr15         | 20282741 | 20291586 +  |
| TC1500000071.oe.1 | -2.46 | -1.30 | 2.46 | down | 9.44  | 10.74 | Inc-SNRPN NONCODE c Inc-SNRPN NONHSAT0: chr15         | 24991486 | 24991753 +  |

|                   |       |       |      |      |       |       |                                                     |          |            |
|-------------------|-------|-------|------|------|-------|-------|-----------------------------------------------------|----------|------------|
| TC1500000072.oe.1 | -2.35 | -1.23 | 2.35 | down | 7.29  | 8.52  | Inc-SNRPN- NONCODE c Inc-SNRPN- NONHSAT0 chr15      | 24993775 | 24994849 + |
| TC1500000233.oe.1 | 2.05  | 1.04  | 2.05 | up   | 3.79  | 2.75  | Inc-C15orf5 NONCODE c Inc-C15orf5 NONHSAT0 chr15    | 39588848 | 39589843 + |
| TC1500000235.oe.1 | 2.48  | 1.31  | 2.48 | up   | 8.24  | 6.93  | Inc-EIF2AK4 LNCipedia lc Inc-EIF2AK4 NONHSAT0 chr15 | 39594068 | 39595551 + |
| TC1500000247.oe.1 | 2.18  | 1.12  | 2.18 | up   | 11.78 | 10.65 | Inc-PAK6-2 NONCODE c Inc-PAK6-2 NONHSAT0 chr15      | 40200038 | 40206274 + |
| TC1500000261.oe.1 | 2.48  | 1.31  | 2.48 | up   | 10.77 | 9.46  | Inc-IVD-2 LNCipedia lc Inc-IVD-2:1 NONHSAT0 chr15   | 40389808 | 40392000 + |
| TC1500000341.oe.1 | -2.06 | -1.04 | 2.06 | down | 8.75  | 9.79  | Inc-CTDSP1 NONCODE c Inc-CTDSP1 NONHSAT0 chr15      | 44380864 | 44382229 + |
| TC1500000367.oe.1 | 2.57  | 1.36  | 2.57 | up   | 4.69  | 3.32  | Inc-C15orf4 LNCipedia lc Inc-C15orf4 NONHSAT0 chr15 | 45507404 | 45508017 + |
| TC1500000464.oe.1 | 2.19  | 1.13  | 2.19 | up   | 5.44  | 4.31  | Inc-UNC13C LNCipedia lc Inc-UNC13C --- chr15        | 54920619 | 54920916 + |
| TC1500000514.oe.1 | -2.18 | -1.13 | 2.18 | down | 7.36  | 8.49  | Inc-RNF111 LNCipedia lc Inc-RNF111 NONHSAT0 chr15   | 58855827 | 58857551 + |
| TC1500000611.oe.1 | 2.57  | 1.36  | 2.57 | up   | 11.51 | 10.14 | Inc-MAP2K1 LNCipedia lc Inc-MAP2K1 NONHSAT0 chr15   | 66523511 | 66528909 + |
| TC1500000623.oe.1 | 2.10  | 1.07  | 2.10 | up   | 4.21  | 3.13  | Inc-SMAD3 LNCipedia lc Inc-SMAD3 NONHSAT0 chr15     | 67255037 | 67279451 + |
| TC1500000841.oe.1 | 2.97  | 1.57  | 2.97 | up   | 6.41  | 4.84  | Inc-MESDC1 LNCipedia lc Inc-MESDC1 NONHSAT0 chr15   | 80946944 | 80949162 + |
| TC1500000999.oe.1 | 2.35  | 1.24  | 2.35 | up   | 8.98  | 7.75  | Inc-CRTC3-1 NONCODE c Inc-CRTC3-1 NONHSAT0 chr15    | 90747390 | 90749960 + |
| TC1500001114.oe.1 | 2.09  | 1.06  | 2.09 | up   | 5.06  | 4.00  | RP11-3501 N/A --- chr15                             | 98660210 | 98660668 + |
| TC1500001274.oe.1 | 2.38  | 1.25  | 2.38 | up   | 6.17  | 4.92  | NONHSAG0 NONCODE c Inc-RP11-3E NONHSAT0 chr15       | 30564940 | 30625773 - |
| TC15000013.hg.4   | -2.12 | -1.08 | 2.12 | down | 3.47  | 4.55  | LINC01193 long interge --- chr15                    | 20940438 | 20993304 + |
| TC1500001384.oe.1 | 2.45  | 1.29  | 2.45 | up   | 5.12  | 3.83  | Inc-FAM82A LNCipedia lc Inc-FAM82A NONHSAT0 chr15   | 40547432 | 40548964 - |
| TC1500001563.oe.1 | 2.35  | 1.23  | 2.35 | up   | 5.57  | 4.34  | CTD-2650P2 N/A --- chr15                            | 52017167 | 52018032 - |
| TC1500001611.oe.1 | 2.44  | 1.29  | 2.44 | up   | 7.40  | 6.11  | Inc-MNS1-4 LNCipedia lc Inc-MNS1-4 NONHSAT0 chr15   | 56421544 | 56434207 - |
| TC1500001783.oe.1 | 2.14  | 1.10  | 2.14 | up   | 6.33  | 5.23  | NONHSAG0 NONCODE c Inc-AAGAB- NONHSAT0 chr15        | 67540787 | 67542604 - |
| TC1500001825.oe.1 | 2.86  | 1.52  | 2.86 | up   | 6.80  | 5.28  | RP11-138H N/A --- chr15                             | 70758269 | 70758856 - |
| TC1500001943.oe.1 | 2.08  | 1.05  | 2.08 | up   | 5.49  | 4.44  | Inc-PEAK1.1 LNCipedia lc Inc-PEAK1.1 NONHSAT0 chr15 | 77069867 | 77071092 - |
| TC1500002126.oe.1 | -2.36 | -1.24 | 2.36 | down | 4.77  | 6.00  | OTTHUMG0 LNCipedia lc Inc-IDH2-1: NONHSAT0 chr15    | 90074512 | 90082207 - |
| TC1500002142.oe.1 | 2.08  | 1.05  | 2.08 | up   | 11.23 | 10.18 | Inc-VPS33B LNCipedia lc Inc-VPS33B NONHSAT0 chr15   | 90981510 | 90994510 - |
| TC15000030.hg.4   | 2.72  | 1.44  | 2.72 | up   | 5.63  | 4.19  | GOLGA8I golgin A8 fa --- chr15                      | 22604272 | 22617853 - |
| TC15000393.hg.4   | 3.19  | 1.67  | 3.19 | up   | 8.41  | 6.74  | GABPB1-AS: GABPB1 anti --- chr15                    | 50354174 | 50367439 + |
| TC1600000003.oe.1 | 2.07  | 1.05  | 2.07 | up   | 7.58  | 6.53  | Inc-MPG-3 NONCODE c Inc-MPG-3: NONHSAT0 chr16       | 53899    | 57453 +    |
| TC1600000122.oe.1 | -2.09 | -1.06 | 2.09 | down | 9.20  | 10.26 | Inc-AMDHD LNCipedia lc Inc-AMDHD NONHSAT1 chr16     | 2565553  | 2571341 +  |
| TC1600000237.oe.1 | -2.76 | -1.47 | 2.76 | down | 6.99  | 8.45  | Inc-PMM2-5 N/A//LNCip lc Inc-PMM2-5 NONHSAT1 chr16  | 9104848  | 9113181 +  |
| TC1600000419.oe.1 | 2.05  | 1.04  | 2.05 | up   | 6.31  | 5.27  | Inc-C16orf5 NONCODE c Inc-C16orf5 NONHSAT1 chr16    | 22008135 | 22087534 + |
| TC1600000447.oe.1 | 2.49  | 1.32  | 2.49 | up   | 6.82  | 5.50  | Inc-DCTN5 LNCipedia lc Inc-DCTN5 NONHSAT1 chr16     | 23687137 | 23688732 + |
| TC1600000889.oe.1 | 2.19  | 1.13  | 2.19 | up   | 6.68  | 5.55  | Inc-CETP-1/ NONCODE c Inc-CETP-1: NONHSAT1 chr16    | 56940278 | 56941726 + |
| TC1600001069.oe.1 | -2.24 | -1.16 | 2.24 | down | 11.86 | 13.03 | Inc-WWP2-1 LNCipedia lc Inc-WWP2-1 NONHSAT1 chr16   | 69703065 | 69704652 + |
| TC1600001498.oe.1 | 2.51  | 1.33  | 2.51 | up   | 5.55  | 4.23  | Inc-C16orf4 LNCipedia lc Inc-C16orf4 NONHSAT0 chr16 | 1364174  | 1366148 -  |
| TC1600001664.oe.1 | -2.81 | -1.49 | 2.81 | down | 3.66  | 5.15  | NONHSAG0 LNCipedia lc Inc-USP7-1: NONHSAT1 chr16    | 9105834  | 9107174 -  |
| TC1600001816.oe.1 | 4.91  | 2.30  | 4.91 | up   | 5.65  | 3.36  | Inc-C16orf8 LNCipedia lc Inc-C16orf8 NONHSAT1 chr16 | 19858971 | 19862340 - |
| TC1600001856.oe.1 | -2.06 | -1.04 | 2.06 | down | 4.50  | 5.54  | Inc-COG7-2 NONCODE c Inc-COG7-2 NONHSAT1 chr16      | 23061406 | 23064173 - |
| TC1600002366.oe.1 | 2.22  | 1.15  | 2.22 | up   | 5.44  | 4.29  | NONHSAG0 LNCipedia lc Inc-ESRP2-3 NONHSAT1 chr16    | 68290087 | 68292790 - |
| TC1600002447.oe.1 | 2.20  | 1.14  | 2.20 | up   | 4.92  | 3.78  | AC009120.1 N/A --- chr16                            | 74289593 | 74291052 - |
| TC1600002455.oe.1 | 2.44  | 1.29  | 2.44 | up   | 9.20  | 7.92  | Inc-MLKL-4 NONCODE c Inc-MLKL-4: NONHSAT1 chr16     | 74643979 | 74644637 - |
| TC1600002457.oe.1 | 2.03  | 1.02  | 2.03 | up   | 6.56  | 5.54  | Inc-MLKL-1 LNCipedia lc Inc-MLKL-1: NONHSAT1 chr16  | 74671857 | 74678413 - |
| TC1600002492.oe.1 | -2.58 | -1.37 | 2.58 | down | 3.23  | 4.60  | RP11-264M: N/A//NONC Inc-ADAMT1 NONHSAT1 chr16      | 77741468 | 77763555 - |
| TC1600002518.oe.1 | -2.06 | -1.04 | 2.06 | down | 3.06  | 4.10  | NONHSAG0 NONCODE c Inc-C16orf6 NONHSAT1 chr16       | 80627551 | 80628379 - |
| TC1700000096.oe.1 | -2.06 | -1.04 | 2.06 | down | 10.74 | 11.78 | Inc-TM4SF5 NONCODE c Inc-TM4SF5 NONHSAT1 chr17      | 4771884  | 4783211 +  |
| TC1700000422.oe.1 | -2.40 | -1.27 | 2.40 | down | 3.39  | 4.65  | Inc-DHRS7B LNCipedia lc Inc-DHRS7B --- chr17        | 20878705 | 20880110 + |
| TC1700000443.oe.1 | 2.20  | 1.14  | 2.20 | up   | 7.98  | 6.84  | Inc-FAM27L LNCipedia lc Inc-FAM27L NONHSAT0 chr17   | 22331597 | 22332410 + |
| TC1700000755.oe.1 | 2.24  | 1.16  | 2.24 | up   | 10.74 | 9.58  | Inc-WIPF2-1 LNCipedia lc Inc-WIPF2-1 NONHSAT0 chr17 | 40291467 | 40295506 + |
| TC1700000826.oe.1 | -2.64 | -1.40 | 2.64 | down | 4.10  | 5.50  | Inc-G6PC-1 LNCipedia lc Inc-G6PC-1: NONHSAT0 chr17  | 42914523 | 42915335 + |
| TC1700000847.oe.1 | 2.39  | 1.26  | 2.39 | up   | 5.28  | 4.02  | Inc-C17orf1 LNCipedia lc Inc-C17orf1 NONHSAT0 chr17 | 43680273 | 43705884 + |

|                   |       |       |      |      |       |       |                           |                           |       |          |          |   |
|-------------------|-------|-------|------|------|-------|-------|---------------------------|---------------------------|-------|----------|----------|---|
| TC1700000979.oe.1 | 2.01  | 1.01  | 2.01 | up   | 4.65  | 3.64  | Inc-UBE2Z-2 LNCipedia     | lc Inc-UBE2Z-2 NONHSAT0!  | chr17 | 48944950 | 48945606 | + |
| TC1700001006.oe.1 | 2.33  | 1.22  | 2.33 | up   | 5.14  | 3.92  | Inc-PDK2-1 LNCipedia      | lc Inc-PDK2-1: NONHSAT0!  | chr17 | 50086329 | 50090481 | + |
| TC1700001037.oe.1 | 2.18  | 1.12  | 2.18 | up   | 10.61 | 9.49  | Inc-ABCC3-1 LNCipedia     | lc Inc-ABCC3-1: NONHSAT0! | chr17 | 50751051 | 50752550 | + |
| TC1700001070.oe.1 | 2.13  | 1.09  | 2.13 | up   | 6.37  | 5.27  | Inc-TOM1L1 LNCipedia      | lc Inc-TOM1L1 ---         | chr17 | 55035765 | 55036638 | + |
| TC1700001073.oe.1 | -2.33 | -1.22 | 2.33 | down | 6.90  | 8.12  | Inc-STXBP4- LNCipedia     | lc Inc-STXBP4- NONHSAT0!  | chr17 | 55161693 | 55164296 | + |
| TC1700001074.oe.1 | -2.22 | -1.15 | 2.22 | down | 4.51  | 5.66  | Inc-STXBP4- N/A//NONC     | Inc-STXBP4- NONHSAT0!     | chr17 | 55167759 | 55173723 | + |
| TC1700001123.oe.1 | 2.30  | 1.20  | 2.30 | up   | 10.95 | 9.74  | Inc-RAD51C NONCODE        | lc Inc-RAD51C NONHSAT0!   | chr17 | 58709639 | 58734342 | + |
| TC1700001174.oe.1 | -2.25 | -1.17 | 2.25 | down | 3.46  | 4.63  | Inc-TBX4-2 LNCipedia      | lc Inc-TBX4-2: ---        | chr17 | 61761588 | 61761801 | + |
| TC1700001284.oe.1 | -2.94 | -1.56 | 2.94 | down | 10.80 | 12.36 | Inc-PRKAR1 LNCipedia      | lc Inc-PRKAR1 NONHSAT0!   | chr17 | 68532540 | 68532769 | + |
| TC1700001295.oe.1 | 2.00  | 1.00  | 2.00 | up   | 6.32  | 5.32  | Inc-KCNJ16- LNCipedia     | lc Inc-KCNJ16- NONHSAT0!  | chr17 | 69536066 | 69542011 | + |
| TC1700001381.oe.1 | -2.13 | -1.09 | 2.13 | down | 4.69  | 5.78  | Inc-C17orf1 LNCipedia     | lc Inc-C17orf1: ---       | chr17 | 75646566 | 75647975 | + |
| TC1700001437.oe.1 | 2.41  | 1.27  | 2.41 | up   | 7.07  | 5.80  | Inc-AFMID-: NONCODE       | lc Inc-AFMID-: NONHSAT0!  | chr17 | 78214365 | 78223856 | + |
| TC1700001746.oe.1 | 2.01  | 1.01  | 2.01 | up   | 8.71  | 7.70  | Inc-KIAA075 NONCODE       | lc Inc-KIAA075 NONHSAT1   | chr17 | 6649889  | 6651575  | - |
| TC1700001804.oe.1 | 2.29  | 1.19  | 2.29 | up   | 11.29 | 10.09 | Inc-C17orf5 LNCipedia     | lc Inc-C17orf5: NONHSAT1  | chr17 | 8206493  | 8208225  | - |
| TC1700001988.oe.1 | -2.14 | -1.10 | 2.14 | down | 5.13  | 6.23  | RP11-81519: NONCODE       | lc Inc-TBC1D2: NONHSAT1   | chr17 | 18667629 | 18669461 | - |
| TC1700002069.oe.1 | 2.04  | 1.03  | 2.04 | up   | 7.34  | 6.31  | Inc-NOS2-1 NONCODE        | lc Inc-NOS2-1 NONHSAT0!   | chr17 | 27350232 | 27353832 | - |
| TC1700002471.oe.1 | 2.14  | 1.10  | 2.14 | up   | 5.40  | 4.30  | Inc-CCDC43 LNCipedia      | lc Inc-CCDC43 NONHSAT0!   | chr17 | 44673688 | 44676257 | - |
| TC1700002622.oe.1 | -3.62 | -1.85 | 3.62 | down | 6.13  | 7.98  | Inc-TOB1-4 LNCipedia      | lc Inc-TOB1-4: NONHSAT0!  | chr17 | 50964149 | 50965494 | - |
| TC1700002679.oe.1 | 2.31  | 1.21  | 2.31 | up   | 6.14  | 4.93  | RP11-159D1 gene_id        | XLC Inc-VEZF1-1 NONHSAT0! | chr17 | 57989039 | 57994850 | - |
| TC1700002693.oe.1 | 2.03  | 1.02  | 2.03 | up   | 8.60  | 7.57  | Inc-RNF43-1 LNCipedia     | lc Inc-RNF43-: NONHSAT0!  | chr17 | 58417013 | 58417595 | - |
| TC1700002777.oe.1 | -2.37 | -1.24 | 2.37 | down | 6.39  | 7.63  | Inc-ERN1-1 NONCODE        | lc Inc-ERN1-1: NONHSAT0!  | chr17 | 64039150 | 64041843 | - |
| TC1700002778.oe.1 | -2.05 | -1.04 | 2.05 | down | 5.78  | 6.81  | Inc-ICAM2-: LNCipedia     | lc Inc-ICAM2-: NONHSAT0!  | chr17 | 64053967 | 64054767 | - |
| TC1700002812.oe.1 | -2.39 | -1.26 | 2.39 | down | 7.25  | 8.51  | Inc-HELZ-4 LNCipedia      | lc Inc-HELZ-4: NONHSAT0!  | chr17 | 67070438 | 67077374 | - |
| TC1700002911.oe.1 | 2.06  | 1.05  | 2.06 | up   | 12.22 | 11.17 | Inc-HN1-3 LNCipedia       | lc Inc-HN1-3:1 NONHSAT0!  | chr17 | 75147538 | 75168261 | - |
| TC1700002941.oe.1 | -2.26 | -1.18 | 2.26 | down | 9.03  | 10.20 | Inc-FBF1-3 LNCipedia      | lc Inc-FBF1-3:1 NONHSAT0! | chr17 | 75942879 | 75943576 | - |
| TC17000352.hg.4   | -2.04 | -1.03 | 2.04 | down | 9.87  | 10.90 | AC005562.1 leucine rich   | --- ---                   | chr17 | 30576465 | 30665698 | + |
| TC1800000040.oe.1 | 2.89  | 1.53  | 2.89 | up   | 11.82 | 10.29 | Inc-EMILIN2 LNCipedia     | lc Inc-EMILIN2 NONHSAT0!  | chr18 | 2728414  | 2739465  | + |
| TC1800000061.oe.1 | 2.13  | 1.09  | 2.13 | up   | 7.41  | 6.31  | Inc-AP00247 LNCipedia     | lc Inc-AP00247 NONHSAT0!  | chr18 | 3653410  | 3656282  | + |
| TC1800000259.oe.1 | -2.40 | -1.26 | 2.40 | down | 4.26  | 5.52  | NONHSAGO NONCODE          | lc Inc-CABYR-: NONHSAT0!  | chr18 | 24114340 | 24115032 | + |
| TC1800000348.oe.1 | 2.26  | 1.18  | 2.26 | up   | 4.92  | 3.74  | Inc-ZNF397 LNCipedia      | lc Inc-ZNF397- NONHSAT0!  | chr18 | 35322431 | 35326981 | + |
| TC1800000495.oe.1 | 2.67  | 1.42  | 2.67 | up   | 8.91  | 7.50  | Inc-C18orf2 LNCipedia     | lc Inc-C18orf2: NONHSAT0! | chr18 | 54828481 | 54888113 | + |
| TC1800000627.oe.1 | -2.39 | -1.25 | 2.39 | down | 8.11  | 9.36  | Inc-DOK6-3 LNCipedia      | lc Inc-DOK6-3 NONHSAT0!   | chr18 | 70327517 | 70330195 | + |
| TC1800000672.oe.1 | 2.18  | 1.12  | 2.18 | up   | 3.75  | 2.63  | Inc-CNDP1- LNCipedia      | lc Inc-CNDP1- ---         | chr18 | 74694422 | 74739974 | + |
| TC1800000907.oe.1 | -2.12 | -1.08 | 2.12 | down | 4.37  | 5.45  | Inc-POTEC-: coxsackie vir | Inc-POTEC-: ---           | chr18 | 14477955 | 14499278 | - |
| TC1800000969.oe.1 | -3.22 | -1.69 | 3.22 | down | 3.71  | 5.39  | RP11-799B1 N/A            | --- ---                   | chr18 | 24135468 | 24135829 | - |
| TC1800000994.oe.1 | -2.03 | -1.02 | 2.03 | down | 4.25  | 5.27  | RP11-9E17.1 N/A           | --- ---                   | chr18 | 26542971 | 26545791 | - |
| TC1800001013.oe.1 | 3.77  | 1.91  | 3.77 | up   | 9.29  | 7.38  | Inc-DSC3-2 NONCODE        | lc Inc-DSC3-2: NONHSAT0!  | chr18 | 30157571 | 30175990 | - |
| TC1800001034.oe.1 | 2.29  | 1.20  | 2.29 | up   | 4.36  | 3.17  | Inc-C18orf3 LNCipedia     | lc Inc-C18orf3- ---       | chr18 | 33516789 | 33517037 | - |
| TC1800001106.oe.1 | 2.41  | 1.27  | 2.41 | up   | 8.08  | 6.82  | Inc-SYT4-7 LNCipedia      | lc Inc-SYT4-7: NONHSAT0!  | chr18 | 44320551 | 44321406 | - |
| TC1800001246.oe.1 | -2.55 | -1.35 | 2.55 | down | 5.66  | 7.01  | Inc-PIGN-6 LNCipedia      | lc Inc-PIGN-6: NONHSAT0!  | chr18 | 61808067 | 61809720 | - |
| TC1800001264.oe.1 | -2.64 | -1.40 | 2.64 | down | 7.65  | 9.06  | Inc-KDSR-1 LNCipedia      | lc Inc-KDSR-1: NONHSAT0!  | chr18 | 63327738 | 63328319 | - |
| TC1800001294.oe.1 | 2.32  | 1.21  | 2.32 | up   | 4.75  | 3.54  | Inc-CD226- LNCipedia      | lc Inc-CD226- NONHSAT0!   | chr18 | 68697376 | 68700423 | - |
| TC1800001368.oe.1 | -2.08 | -1.06 | 2.08 | down | 10.07 | 11.13 | Inc-MBP-12 LNCipedia      | lc Inc-MBP-12 NONHSAT0!   | chr18 | 76360586 | 76360989 | - |
| TC18000077.hg.4   | 2.32  | 1.22  | 2.32 | up   | 6.37  | 5.15  | ANKRD20A5 ankyrin repe    | --- ---                   | chr18 | 14179097 | 14227050 | + |
| TC1900000209.oe.1 | 4.00  | 2.00  | 4.00 | up   | 10.06 | 8.06  | Inc-TRIP10- LNCipedia     | lc Inc-TRIP10- NONHSAT0!  | chr19 | 6680178  | 6720562  | + |
| TC1900000272.oe.1 | 2.17  | 1.12  | 2.17 | up   | 5.93  | 4.81  | NONHSAGO NONCODE          | lc Inc-ZNF559- NONHSAT0!  | chr19 | 9344784  | 9345898  | + |
| TC1900000568.oe.1 | 2.33  | 1.22  | 2.33 | up   | 5.78  | 4.57  | Inc-ZNF85- LNCipedia      | lc Inc-ZNF85- ( NONHSAT0! | chr19 | 20964835 | 20965194 | + |
| TC1900000581.oe.1 | 2.03  | 1.02  | 2.03 | up   | 6.31  | 5.29  | Inc-ZNF738- LNCipedia     | lc Inc-ZNF738- NONHSAT0!  | chr19 | 21411940 | 21414599 | + |
| TC1900000642.oe.1 | 3.05  | 1.61  | 3.05 | up   | 6.46  | 4.85  | Inc-ZNF726- NONCODE       | lc Inc-ZNF726- NONHSAT0!  | chr19 | 24104186 | 24107352 | + |

|                   |       |       |      |      |       |       |                        |                        |       |          |            |
|-------------------|-------|-------|------|------|-------|-------|------------------------|------------------------|-------|----------|------------|
| TC1900000742.oe.1 | 2.11  | 1.08  | 2.11 | up   | 4.19  | 3.11  | lnc-ZNF30-4 LNCipedia  | lnc-ZNF30-4 ---        | chr19 | 34948790 | 34949061 + |
| TC1900000760.oe.1 | -2.00 | -1.00 | 2.00 | down | 2.93  | 3.93  | lnc-MAG-1 LNCipedia    | lnc-MAG-1: NONHSAT0f   | chr19 | 35329187 | 35329928 + |
| TC1900000817.oe.1 | 2.02  | 1.02  | 2.02 | up   | 6.79  | 5.78  | lnc-ZNF382 LNCipedia   | lnc-ZNF382: ---        | chr19 | 36580255 | 36583605 + |
| TC1900000844.oe.1 | 2.14  | 1.10  | 2.14 | up   | 6.56  | 5.47  | lnc-ZNF570 LNCipedia   | lnc-ZNF570: NONHSAT0f  | chr19 | 37508265 | 37543296 + |
| TC1900001026.oe.1 | -2.37 | -1.25 | 2.37 | down | 8.47  | 9.72  | lnc-APOC4- NONCODE     | lnc-APOC4- NONHSAT0f   | chr19 | 44942238 | 44949565 + |
| TC1900001146.oe.1 | 2.20  | 1.14  | 2.20 | up   | 9.62  | 8.48  | lnc-LIN7B-2 LNCipedia  | lnc-LIN7B-2 NONHSAT0f  | chr19 | 49085433 | 49086443 + |
| TC1900001604.oe.1 | 2.14  | 1.10  | 2.14 | up   | 7.10  | 6.01  | NONHSAGO NONCODE       | lnc-C19orf1f NONHSAT0f | chr19 | 4654964  | 4655524 -  |
| TC1900001653.oe.1 | 8.20  | 3.04  | 8.20 | up   | 10.51 | 7.47  | CTD-3128G: N/A         | ---                    | chr19 | 6716386  | 6717742 -  |
| TC1900001739.oe.1 | 2.33  | 1.22  | 2.33 | up   | 9.76  | 8.54  | lnc-ANGPTL LNCipedia   | lnc-ANGPTL NONHSAT0f   | chr19 | 10116901 | 10117590 - |
| TC1900001958.oe.1 | 2.01  | 1.01  | 2.01 | up   | 6.46  | 5.45  | lnc-HOMER: NONCODE     | lnc-HOMER: NONHSAT0f   | chr19 | 18990893 | 18993713 - |
| TC1900002024.oe.1 | 2.28  | 1.19  | 2.28 | up   | 7.32  | 6.13  | lnc-ZNF43-1 NONCODE    | lnc-ZNF43-1: NONHSAT0f | chr19 | 21843320 | 21852030 - |
| TC1900002040.oe.1 | 2.02  | 1.02  | 2.02 | up   | 5.93  | 4.91  | lnc-ZNF98-7 NONCODE    | lnc-ZNF98-7: NONHSAT0f | chr19 | 22501699 | 22501948 - |
| TC1900002124.oe.1 | -2.02 | -1.01 | 2.02 | down | 7.89  | 8.91  | lnc-CEP89-4 LNCipedia  | lnc-CEP89-4 NONHSAT0f  | chr19 | 32994022 | 32996461 - |
| TC1900002225.oe.1 | 2.82  | 1.49  | 2.82 | up   | 7.75  | 6.25  | lnc-ZNF790 NONCODE     | lnc-ZNF790 NONHSAT0f   | chr19 | 36761495 | 36762617 - |
| TC1900002398.oe.1 | 2.00  | 1.00  | 2.00 | up   | 4.81  | 3.81  | lnc-ZNF235 NONCODE     | lnc-ZNF235: NONHSAT0f  | chr19 | 44140601 | 44141494 - |
| TC1900002411.oe.1 | -3.36 | -1.75 | 3.36 | down | 8.89  | 10.64 | lnc-ZNF296 LNCipedia   | lnc-ZNF296: NONHSAT0f  | chr19 | 44907907 | 44909013 - |
| TC1900002628.oe.1 | -2.24 | -1.16 | 2.24 | down | 3.52  | 4.68  | NONHSAGO LNCipedia     | lnc-ZNF841: NONHSAT0f  | chr19 | 52058490 | 52063703 - |
| TC19000167.hg.4   | -2.95 | -1.56 | 2.95 | down | 3.54  | 5.10  | C3P1 complement        | ---                    | chr19 | 10041356 | 10074137 + |
| TC19001172.hg.4   | 2.15  | 1.10  | 2.15 | up   | 6.84  | 5.73  | ILF3-AS1 ILF3 antisens | ---                    | chr19 | 10651862 | 10653872 - |
| TC19001374.hg.4   | -2.14 | -1.10 | 2.14 | down | 8.33  | 9.43  | HAVCR1P1 hepatitis A v | ---                    | chr19 | 24162193 | 24163447 - |
| TC2000000172.oe.1 | 2.30  | 1.20  | 2.30 | up   | 4.46  | 3.26  | lnc-ZNF133 LNCipedia   | lnc-ZNF133: ---        | chr20 | 18326151 | 18329543 + |
| TC2000000188.oe.1 | -2.49 | -1.32 | 2.49 | down | 4.40  | 5.72  | lnc-NAA20- LNCipedia   | lnc-NAA20- NONHSAT0f   | chr20 | 19889410 | 19935550 + |
| TC2000000205.oe.1 | 2.30  | 1.20  | 2.30 | up   | 6.33  | 5.13  | RP11-227D2 N/A//NONC   | lnc-XRN2-1: NONHSAT0f  | chr20 | 21397818 | 21400391 + |
| TC2000000263.oe.1 | -2.01 | -1.01 | 2.01 | down | 3.60  | 4.61  | lnc-GINS1-3 LNCipedia  | lnc-GINS1-3 NONHSAT0f  | chr20 | 25443024 | 25452628 + |
| TC2000000268.oe.1 | 2.07  | 1.05  | 2.07 | up   | 6.49  | 5.44  | lnc-GINS1-6 LNCipedia  | lnc-GINS1-6 ---        | chr20 | 25699218 | 25700761 + |
| TC2000000316.oe.1 | 2.09  | 1.06  | 2.09 | up   | 8.25  | 7.18  | lnc-DNMT3f LNCipedia   | lnc-DNMT3f NONHSAT0f   | chr20 | 32809039 | 32809357 + |
| TC2000000633.oe.1 | -3.34 | -1.74 | 3.34 | down | 5.57  | 7.31  | lnc-RAB22A LNCipedia   | lnc-RAB22A NONHSAT0f   | chr20 | 58447405 | 58451094 + |
| TC2000001022.oe.1 | 2.18  | 1.12  | 2.18 | up   | 7.24  | 6.12  | lnc-ZNF337 NONCODE     | lnc-ZNF337: NONHSAT0f  | chr20 | 25835985 | 25836832 - |
| TC2000001109.oe.1 | 2.66  | 1.41  | 2.66 | up   | 9.03  | 7.62  | lnc-FAM83C LNCipedia   | lnc-FAM83C NONHSAT0f   | chr20 | 35345716 | 35347189 - |
| TC2000001173.oe.1 | -2.03 | -1.02 | 2.03 | down | 3.20  | 4.22  | lnc-MAFB-7 LNCipedia   | lnc-MAFB-7 NONHSAT0f   | chr20 | 39932922 | 39933239 - |
| TC2000001331.oe.1 | 2.32  | 1.22  | 2.32 | up   | 8.61  | 7.39  | lnc-BCAS1-4 LNCipedia  | lnc-BCAS1-4 NONHSAT0f  | chr20 | 54162580 | 54164548 - |
| TC20000747.hg.4   | -2.06 | -1.04 | 2.06 | down | 4.02  | 5.06  | MLLT10P1 myeloid/lym   | ---                    | chr20 | 30402908 | 30403462 - |
| TC2100000015.oe.1 | 3.84  | 1.94  | 3.84 | up   | 10.40 | 8.46  | CH507-513f N/A         | ---                    | chr21 | 8197620  | 8227646 +  |
| TC2100000016.oe.1 | 2.05  | 1.04  | 2.05 | up   | 9.43  | 8.39  | CH507-528f N/A         | ---                    | chr21 | 8383777  | 8410645 +  |
| TC2100000032.oe.1 | 2.87  | 1.52  | 2.87 | up   | 4.66  | 3.13  | lnc-POTED- LNCipedia   | lnc-POTED- NONHSAT1f   | chr21 | 13065573 | 13066975 + |
| TC2100000153.oe.1 | -2.15 | -1.10 | 2.15 | down | 2.58  | 3.69  | lnc-GABPA- LNCipedia   | lnc-GABPA- ---         | chr21 | 26935234 | 26945104 + |
| TC2100000303.oe.1 | -2.07 | -1.05 | 2.07 | down | 5.62  | 6.67  | lnc-DSCR8-: NONCODE    | lnc-DSCR8-: NONHSAT0f  | chr21 | 38121451 | 38188016 + |
| TC2100000383.oe.1 | 2.14  | 1.10  | 2.14 | up   | 4.21  | 3.11  | lnc-CRYAA- NONCODE     | lnc-CRYAA- NONHSAT0f   | chr21 | 43111995 | 43112200 + |
| TC2100000465.oe.1 | 2.46  | 1.30  | 2.46 | up   | 9.12  | 7.82  | lnc-PCBP3-5 LNCipedia  | lnc-PCBP3-5 NONHSAT0f  | chr21 | 45483805 | 45484746 + |
| TC2100000490.oe.1 | 2.38  | 1.25  | 2.38 | up   | 6.38  | 5.13  | lnc-PCNT-2 NONCODE     | lnc-PCNT-2: NONHSAT0f  | chr21 | 46292765 | 46294797 + |
| TC2100000566.oe.1 | 2.27  | 1.18  | 2.27 | up   | 4.95  | 3.77  | lnc-AF16513 LNCipedia  | lnc-AF16513: NONHSAT0f | chr21 | 14979232 | 14990989 - |
| TC2100000588.oe.1 | 2.19  | 1.13  | 2.19 | up   | 4.52  | 3.39  | lnc-BTG3-6 LNCipedia   | lnc-BTG3-6: NONHSAT0f  | chr21 | 17500477 | 17512529 - |
| TC2100000815.oe.1 | 2.23  | 1.16  | 2.23 | up   | 4.17  | 3.01  | lnc-KCNJ6-2 LNCipedia  | lnc-KCNJ6-2 ---        | chr21 | 37928141 | 37932822 - |
| TC21000116.hg.4   | 3.42  | 1.77  | 3.42 | up   | 5.76  | 3.98  | C21orf119 chromosome   | ---                    | chr21 | 32393130 | 32393960 + |
| TC2200000359.oe.1 | 2.49  | 1.31  | 2.49 | up   | 13.97 | 12.66 | lnc-AC0050f LNCipedia  | lnc-AC0050f NONHSAT0f  | chr22 | 31399633 | 31411060 + |
| TC2200000420.oe.1 | 2.81  | 1.49  | 2.81 | up   | 7.15  | 5.65  | lnc-MCM5-2 LNCipedia   | lnc-MCM5-2: NONHSAT0f  | chr22 | 35381143 | 35386850 + |
| TC2200000424.oe.1 | 2.29  | 1.19  | 2.29 | up   | 5.87  | 4.68  | lnc-APOL6-: LNCipedia  | lnc-APOL6-: NONHSAT0f  | chr22 | 35666257 | 35668386 + |
| TC2200000580.oe.1 | 3.01  | 1.59  | 3.01 | up   | 8.94  | 7.35  | lnc-SERHL2 NONCODE     | lnc-SERHL2: NONHSAT0f  | chr22 | 42614914 | 42616588 + |
| TC2200000645.oe.1 | -2.46 | -1.30 | 2.46 | down | 7.20  | 8.50  | lnc-PPARA- LNCipedia   | lnc-PPARA- NONHSAT0f   | chr22 | 46242515 | 46243756 + |

|                   |       |       |      |      |      |      |                                           |       |          |          |   |
|-------------------|-------|-------|------|------|------|------|-------------------------------------------|-------|----------|----------|---|
| TC2200000772.oe.1 | -3.28 | -1.71 | 3.28 | down | 4.17 | 5.88 | lnc-AC0081(LNCipedia lnc-AC0081(---       | chr22 | 18729353 | 18733601 | - |
| TC2200000958.oe.1 | 2.09  | 1.06  | 2.09 | up   | 5.61 | 4.54 | lnc-TTC28-1LNCipedia lnc-TTC28-1NONHSAT0{ | chr22 | 28687749 | 28689410 | - |
