# Supplementary material for: Differentially Expressed Long Noncoding RNAs Involved in FUBP1 Promoting Hepatocellular Carcinoma Cells Proliferation
Source: Hindawi journal article supplement (doi:10.1155/2021/6664519), 2021-01-01
Supplement: f4 [file 6664519.f4.pdf]

| Pvalue | correlation | Probe Set ID    | p    | FC (abs) | Regulation | p    | FC (abs) | Regulation | GeneSymbol | Probe Set ID | p    | FC (abs) | Regulation | p    | FC (abs) | Regulation |
|--------|-------------|-----------------|------|----------|------------|------|----------|------------|------------|--------------|------|----------|------------|------|----------|------------|
| 0.05   | 0.82        | TC01002803.hg.4 | 0.01 | 8.12     | up         | 0.01 | 8.12     | up         | FUBP1      | TC01000042   | 0.01 | 2.25     | up         | 0.01 | 2.25     | up         |
| 0.02   | -0.89       | TC01002803.hg.4 | 0.01 | 8.12     | up         | 0.01 | 8.12     | up         | FUBP1      | TC02000044   | 0.03 | 2.06     | down       | 0.03 | 2.06     | down       |
| 0.04   | -0.84       | TC01002803.hg.4 | 0.01 | 8.12     | up         | 0.01 | 8.12     | up         | FUBP1      | TC0X000002   | 0.01 | 2.11     | down       | 0.01 | 2.11     | down       |
| 0.00   | 0.96        | TC01002803.hg.4 | 0.01 | 8.12     | up         | 0.01 | 8.12     | up         | FUBP1      | TC12000009   | 0.01 | 2.22     | up         | 0.01 | 2.22     | up         |
| 0.04   | -0.83       | TC01002803.hg.4 | 0.01 | 8.12     | up         | 0.01 | 8.12     | up         | FUBP1      | TC14000005   | 0.03 | 2.34     | down       | 0.03 | 2.34     | down       |
| 0.03   | -0.86       | TC02000705.hg.4 | 0.03 | 2.07     | down       | 0.03 | 2.07     | down       | ZC3H6//AC  | TC01000042   | 0.01 | 2.25     | up         | 0.01 | 2.25     | up         |
| 0.02   | 0.87        | TC02000705.hg.4 | 0.03 | 2.07     | down       | 0.03 | 2.07     | down       | ZC3H6//AC  | TC02000044   | 0.03 | 2.06     | down       | 0.03 | 2.06     | down       |
| 0.04   | 0.82        | TC02000705.hg.4 | 0.03 | 2.07     | down       | 0.03 | 2.07     | down       | ZC3H6//AC  | TC14000003   | 0.02 | 2.51     | down       | 0.02 | 2.51     | down       |
| 0.00   | -0.96       | TC03000434.hg.4 | 0.03 | 2.21     | down       | 0.03 | 2.21     | down       | LOC101927  | TC01000042   | 0.01 | 2.25     | up         | 0.01 | 2.25     | up         |
| 0.01   | 0.91        | TC04000437.hg.4 | 0.00 | 2.70     | up         | 0.00 | 2.70     | up         | ANXA3      | TC01000042   | 0.01 | 2.25     | up         | 0.01 | 2.25     | up         |
| 0.01   | -0.94       | TC04000516.hg.4 | 0.02 | 2.42     | down       | 0.02 | 2.42     | down       | MTTP       | TC10000015   | 0.02 | 2.00     | down       | 0.02 | 2.00     | down       |
| 0.03   | 0.87        | TC04000859.hg.4 | 0.04 | 2.01     | down       | 0.04 | 2.01     | down       | CEP44      | TC02000044   | 0.03 | 2.06     | down       | 0.03 | 2.06     | down       |
| 0.03   | 0.85        | TC04000859.hg.4 | 0.04 | 2.01     | down       | 0.04 | 2.01     | down       | CEP44      | TC05000013   | 0.03 | 2.08     | down       | 0.03 | 2.08     | down       |
| 0.00   | 0.97        | TC04000859.hg.4 | 0.04 | 2.01     | down       | 0.04 | 2.01     | down       | CEP44      | TC0X000002   | 0.01 | 2.11     | down       | 0.01 | 2.11     | down       |
| 0.02   | 0.88        | TC04000859.hg.4 | 0.04 | 2.01     | down       | 0.04 | 2.01     | down       | CEP44      | TC11000028   | 0.04 | 2.11     | down       | 0.04 | 2.11     | down       |
| 0.04   | 0.83        | TC04000859.hg.4 | 0.04 | 2.01     | down       | 0.04 | 2.01     | down       | CEP44      | TC14000003   | 0.02 | 2.51     | down       | 0.02 | 2.51     | down       |
| 0.00   | 0.95        | TC04000859.hg.4 | 0.04 | 2.01     | down       | 0.04 | 2.01     | down       | CEP44      | TC14000005   | 0.03 | 2.34     | down       | 0.03 | 2.34     | down       |
| 0.01   | 0.91        | TC05001596.hg.4 | 0.00 | 2.13     | down       | 0.00 | 2.13     | down       | NR2F1-AS1  | TC10000015   | 0.02 | 2.00     | down       | 0.02 | 2.00     | down       |
| 0.00   | 0.97        | TC05001596.hg.4 | 0.00 | 2.13     | down       | 0.00 | 2.13     | down       | NR2F1-AS1  | TC14000003   | 0.02 | 2.51     | down       | 0.02 | 2.51     | down       |
| 0.01   | 0.93        | TC05001973.hg.4 | 0.01 | 2.50     | down       | 0.01 | 2.50     | down       | FAXDC2     | TC01000021   | 0.01 | 2.13     | down       | 0.01 | 2.13     | down       |
| 0.02   | 0.88        | TC05001973.hg.4 | 0.01 | 2.50     | down       | 0.01 | 2.50     | down       | FAXDC2     | TC0X000001   | 0.04 | 2.01     | down       | 0.04 | 2.01     | down       |
| 0.05   | -0.81       | TC05001973.hg.4 | 0.01 | 2.50     | down       | 0.01 | 2.50     | down       | FAXDC2     | TC12000009   | 0.01 | 2.22     | up         | 0.01 | 2.22     | up         |
| 0.04   | -0.84       | TC05001973.hg.4 | 0.01 | 2.50     | down       | 0.01 | 2.50     | down       | FAXDC2     | TC15000002   | 0.01 | 2.59     | up         | 0.01 | 2.59     | up         |
| 0.03   | -0.86       | TC07001758.hg.4 | 0.02 | 2.88     | down       | 0.02 | 2.88     | down       | IMMP2L     | TC01000042   | 0.01 | 2.25     | up         | 0.01 | 2.25     | up         |
| 0.00   | 0.95        | TC0X001416.hg.4 | 0.02 | 2.28     | down       | 0.02 | 2.28     | down       | ARHGEF6    | TC10000015   | 0.02 | 2.00     | down       | 0.02 | 2.00     | down       |
| 0.01   | 0.93        | TC0X001416.hg.4 | 0.02 | 2.28     | down       | 0.02 | 2.28     | down       | ARHGEF6    | TC14000003   | 0.02 | 2.51     | down       | 0.02 | 2.51     | down       |
| 0.02   | 0.88        | TC10000798.hg.4 | 0.00 | 2.03     | down       | 0.00 | 2.03     | down       | MXI1       | TC0X000001   | 0.04 | 2.01     | down       | 0.04 | 2.01     | down       |
| 0.02   | -0.87       | TC10000798.hg.4 | 0.00 | 2.03     | down       | 0.00 | 2.03     | down       | MXI1       | TC10000015   | 0.02 | 2.00     | down       | 0.02 | 2.00     | down       |
| 0.00   | -0.96       | TC10000798.hg.4 | 0.00 | 2.03     | down       | 0.00 | 2.03     | down       | MXI1       | TC15000002   | 0.01 | 2.59     | up         | 0.01 | 2.59     | up         |
| 0.00   | 0.94        | TC12000779.hg.4 | 0.03 | 2.20     | down       | 0.03 | 2.20     | down       | GAS2L3     | TC01000021   | 0.01 | 2.13     | down       | 0.01 | 2.13     | down       |
| 0.04   | 0.82        | TC12000779.hg.4 | 0.03 | 2.20     | down       | 0.03 | 2.20     | down       | GAS2L3     | TC05000013   | 0.03 | 2.08     | down       | 0.03 | 2.08     | down       |
| 0.00   | 0.98        | TC12000779.hg.4 | 0.03 | 2.20     | down       | 0.03 | 2.20     | down       | GAS2L3     | TC0X000001   | 0.04 | 2.01     | down       | 0.04 | 2.01     | down       |
| 0.00   | -0.96       | TC12000779.hg.4 | 0.03 | 2.20     | down       | 0.03 | 2.20     | down       | GAS2L3     | TC15000002   | 0.01 | 2.59     | up         | 0.01 | 2.59     | up         |
| 0.01   | 0.93        | TC14002295.hg.4 | 0.05 | 2.11     | down       | 0.05 | 2.11     | down       | MIA2       | TC01000021   | 0.01 | 2.13     | down       | 0.01 | 2.13     | down       |
| 0.05   | 0.81        | TC14002295.hg.4 | 0.05 | 2.11     | down       | 0.05 | 2.11     | down       | MIA2       | TC05000013   | 0.03 | 2.08     | down       | 0.03 | 2.08     | down       |
| 0.02   | -0.89       | TC14002295.hg.4 | 0.05 | 2.11     | down       | 0.05 | 2.11     | down       | MIA2       | TC12000009   | 0.01 | 2.22     | up         | 0.01 | 2.22     | up         |
| 0.05   | -0.82       | TC15000270.hg.4 | 0.04 | 2.33     | up         | 0.04 | 2.33     | up         | THBS1      | TC01000021   | 0.01 | 2.13     | down       | 0.01 | 2.13     | down       |
| 0.00   | -0.98       | TC15000270.hg.4 | 0.04 | 2.33     | up         | 0.04 | 2.33     | up         | THBS1      | TC0X000001   | 0.04 | 2.01     | down       | 0.04 | 2.01     | down       |
| 0.00   | 1.00        | TC15000270.hg.4 | 0.04 | 2.33     | up         | 0.04 | 2.33     | up         | THBS1      | TC15000002   | 0.01 | 2.59     | up         | 0.01 | 2.59     | up         |
| 0.00   | -0.95       | TC17001786.hg.4 | 0.03 | 2.11     | up         | 0.03 | 2.11     | up         | FTSJ3      | TC01000021   | 0.01 | 2.13     | down       | 0.01 | 2.13     | down       |
| 0.04   | -0.83       | TC17001786.hg.4 | 0.03 | 2.11     | up         | 0.03 | 2.11     | up         | FTSJ3      | TC02000044   | 0.03 | 2.06     | down       | 0.03 | 2.06     | down       |
| 0.01   | -0.93       | TC17001786.hg.4 | 0.03 | 2.11     | up         | 0.03 | 2.11     | up         | FTSJ3      | TC05000013   | 0.03 | 2.08     | down       | 0.03 | 2.08     | down       |
| 0.01   | -0.90       | TC17001786.hg.4 | 0.03 | 2.11     | up         | 0.03 | 2.11     | up         | FTSJ3      | TC0X000002   | 0.01 | 2.11     | down       | 0.01 | 2.11     | down       |
| 0.02   | -0.88       | TC17001786.hg.4 | 0.03 | 2.11     | up         | 0.03 | 2.11     | up         | FTSJ3      | TC11000028   | 0.04 | 2.11     | down       | 0.04 | 2.11     | down       |
| 0.01   | 0.92        | TC17001786.hg.4 | 0.03 | 2.11     | up         | 0.03 | 2.11     | up         | FTSJ3      | TC12000009   | 0.01 | 2.22     | up         | 0.01 | 2.22     | up         |
| 0.01   | -0.92       | TC17001786.hg.4 | 0.03 | 2.11     | up         | 0.03 | 2.11     | up         | FTSJ3      | TC14000005   | 0.03 | 2.34     | down       | 0.03 | 2.34     | down       |
